# Supplementary material for: Computational analysis of the amino acid interactions that promote or decrease protein solubility
Source: PubMed Central journal article supplement (PMC6168528; doi:10.1038/s41598-018-32988-w), 2018-10-02

## Supplementary Information

### Computational analysis of the amino acid interactions that promote or decrease protein solubility

Qingzhen Hou, Raphaël Bourgeas, Fabrizio Pucci\*, Marianne Rooman\*

Department of BioModeling BioInformatics & BioProcesses,  
Université Libre de Bruxelles, Brussels, Belgium

Emails: qinghou@ulb.ac.be, fapucci@ulb.ac.be, mrooman@ulb.ac.be

(\*) Co-last authors

**Table S1. Dataset.** List of proteins used in the derivation of the (solubility)-dependent statistical potentials and their characteristics.

**Table S2. Insolubilizing interactions.** List of insolubilizing amino acid interactions which satisfy the relaxed significance criteria.

**Table S3. Solubilizing interactions.** List of solubilizing amino acid interactions which are statistically significant.

**Figure S1. Solubility distribution.** Distribution of solubility values  $\mathcal{S}$  (in %) of the proteins from the  $\mathcal{D}^{\text{tot}}$  dataset.

**Figure S2. Amino acid frequencies in soluble and aggregation-prone proteins.** Ratio of the frequency of each amino acid in the set  $\mathcal{D}^{\text{insol}}$  over the frequency in the set  $\mathcal{D}^{\text{sol}}$ , minus 1.

**Figure S3. Distance potentials.** Distance potentials of all 210 residue-residue pairs derived from soluble or aggregation-prone protein sets.

**Figure S4. Distance group potentials.** Residue-residue group potentials derived from datasets of highly soluble proteins, soluble proteins, aggregation-prone proteins, and highly aggregation-prone proteins.

**Table S1. List of proteins from the  $D^{\text{sol}}$  set used for the derivation of solubility-dependent statistical potentials.** The PDB codes of the proteins from the  $D^{\text{sol}}$  subset are in blue and those from  $D^{\text{insol}}$  are in red. The values of  $\Delta W_{S,C}^{\text{sol}} - \Delta W_{S,C}^{\text{insol}}$  and  $\Delta W_{S,C}^{\text{all}}$  are in kcal/mol. pI means isoelectric point and AI aliphatic index.

| PDB Code | Chain | Bio Unit | Resolution (Å) | pI  | AI                | Length | Solubility (%) | $\Delta W^{\text{total}}$ (kcal/mol) | $\Delta W^{\text{insol}} - \Delta W^{\text{sol}}$ (kcal/mol) |
|----------|-------|----------|----------------|-----|-------------------|--------|----------------|--------------------------------------|--------------------------------------------------------------|
| 1dnp     | A     | Monomer  | 2.3            | 6.7 | 80.4              | 471    | 2              | -108.98                              | -88.23                                                       |
| 3qs3     | A     | Monomer  | 2.1            | 4.9 | 72                | 191    | 2              | -35.53                               | -12.13                                                       |
| 2bli     | A     | Homo2    | 2.3            | 5.8 | 92.9              | 345    | 3              | -92.61                               | -15.70                                                       |
| 1db3     | A     | Homo2    | 2.3            | 5.8 | 84.1              | 372    | 4              | -60.89                               | -0.56                                                        |
| 2jlc     | A     | Homo2    | 2.5            | 6.2 | 94.3              | 577    | 4              | -260.81                              | -44.95                                                       |
| 2wiu     | A     | Hetero4  | 2.35           | 8.3 | 93.6              | 446    | 4              | -74.41                               | -5.80                                                        |
| 5kvr     | A     | Homo2    | 1.36           | 9.7 | 98.8              | 77     | 4              | -19.54                               | -0.58                                                        |
| 2i06     | A     | Monomer  | 2.2            | 9.6 | 100.1             | 309    | 5              | -36.97                               | -17.61                                                       |
| 3n75     | A     | Homo10   | 2              | 5.9 | 83.5              | 715    | 5              | -205.94                              | -27.63                                                       |
| 2a9w     | A     | Homo2    | 1.65           | 5.6 | 84.2              | 264    | 6              | -77.98                               | -47.29                                                       |
| 3qxf     | A     | Monomer  | 1.85           | 7.9 | 64.9              | 355    | 6              | -46.54                               | -49.83                                                       |
| 2c4n     | A     | Homo4    | 1.8            | 5.2 | 92.5              | 250    | 7              | -148.72                              | 21.83                                                        |
| 5caj     | A     | Monomer  | 1.65           | 7.9 | 83.9              | 278    | 7              | -32.44                               | -4.88                                                        |
| 2cxa     | A     | Monomer  | 1.6            | 7.7 | 78.1              | 256    | 8              | -76.47                               | -49.94                                                       |
| 4i8o     | A     | Monomer  | 2.1            | 6.4 | 98                | 358    | 8              | -104.28                              | -3.58                                                        |
| 4muo     | A     | Homo2    | 1.94           | 6.8 | 89                | 328    | 8              | -145.23                              | 2.54                                                         |
| 4xb6     | D     | Hetero8  | 1.7            | 5.1 | 74.2              | 281    | 8              | -35.95                               | -2.90                                                        |
| 1r8g     | A     | Homo2    | 2.15           | 5.7 | 83.7              | 372    | 9              | -122.54                              | -42.09                                                       |
| 1u08     | A     | Homo2    | 2.35           | 5.8 | 92.6              | 386    | 9              | -177.25                              | -23.87                                                       |
| 3i8s     | A     | Monomer  | 1.8            | 5.3 | 109.3             | 274    | 9              | -117.93                              | 2.28                                                         |
| 3uqy     | L     | Hetero2  | 1.47           | 5.8 | 84.5              | 582    | 9              | -167.50                              | -88.76                                                       |
| 4lrz     | E     | Hetero4  | 2.32           | 5.5 | 99.2              | 318    | 9              | -141.16                              | -24.33                                                       |
| 1udc     | A     | Homo2    | 1.65           | 5.9 | 84.5              | 338    | 10             | -124.12                              | -26.09                                                       |
| 4bfa     | A     | Monomer  | 1.65           | 6.7 | 96.3              | 338    | 10             | -124.38                              | -4.54                                                        |
| 4lw2     | A     | Homo2    | 1.8            | 5.4 | 92.8              | 404    | 10             | -190.40                              | -17.72                                                       |
| 1i2k     | A     | Homo2    | 1.79           | 6.1 | 95.7              | 269    | 11             | -88.85                               | -44.31                                                       |
| 1lqa     | A     | Monomer  | 1.6            | 6.3 | 88.3              | 346    | 11             | -110.38                              | -22.29                                                       |
| 1qsa     | A     | Monomer  | 1.65           | 8.5 | 73.4              | 618    | 11             | -147.27                              | -108.58                                                      |
| 1v9y     | A     | Homo2    | 1.32           | 6.5 | 77.7              | 167    | 11             | -9.76                                | 3.61                                                         |
| 1z9t     | A     | Monomer  | 1.54           | 6.6 | 76.6              | 255    | 11             | -75.00                               | -35.32                                                       |
| 4bh5     | A     | Monomer  | 1.57           | 9.7 | 83                | 142    | 11             | -42.05                               | -2.29                                                        |
| 4jrp     | A     | Monomer  | 1.95           | 5.5 | 83.3              | 478    | 11             | -114.94                              | -47.51                                                       |
| 1bl0     | A     | Monomer  | 2.3            | 9.4 | 64.3              | 129    | 12             | -1.48                                | -2.97                                                        |
| 1sur     | A     | Homo2    | 2              | 5.5 | 102.1             | 215    | 12             | -52.08                               | -9.30                                                        |
| 1j3e     | A     | Monomer  | 2.5            | 7.3 | 82.4              | 115    | 13             | -57.83                               | -2.67                                                        |
| 1j54     | A     | Monomer  | 1.7            | 5.3 | 91.8              | 186    | 13             | -48.19                               | 15.43                                                        |
| 1zzm     | A     | Monomer  | 1.8            | 6.1 | 94.6              | 259    | 13             | -118.94                              | 8.41                                                         |
| 3abq     | A     | Hetero12 | 2.05           | 4.8 | 91.1              | 453    | 13             | -88.54                               | 12.55                                                        |
| 4blu     | A     | Monomer  | 1.85           | 8.9 | 93.5              | 289    | 13             | -72.84                               | -15.21                                                       |
| 1gvf     | A     | Homo4    | 1.45           | 5.4 | 93.8              | 286    | 14             | -149.66                              | 19.28                                                        |
| 1uug     | A     | Hetero2  | 2.4            | 6.7 | 86.9              | 229    | 14             | -83.21                               | -22.57                                                       |
| 1ec7     | A     | Homo4    | 1.9            | 5.7 | 81.8              | 446    | 15             | -153.06                              | -6.23                                                        |
| 1k77     | A     | Monomer  | 1.63           | 5.1 | 86                | 260    | 15             | -96.76                               | -30.61                                                       |
| 2dtk     | A     | Homo6    | 1.9            | 5.3 | 79.5              | 452    | 15             | -112.39                              | -53.29                                                       |
| 2f1f     | A     | Homo2    | 1.75           | 8   | 111.7             | 164    | 15             | -42.74                               | 19.03                                                        |
| 3asu     | A     | Homo4    | 1.9            | 5.7 | 90                | 248    | 15             | -99.96                               | 8.91                                                         |
| 3lbf     | A     | Monomer  | 1.8            | 6.5 | 104.5             | 210    | 15             | -67.89                               | 0.26                                                         |
| 3vus     | A     | Monomer  | 1.65           | 5.8 | 81.5              | 268    | 15             | -99.01                               | -19.95                                                       |
| 5dcf     | A     | Monomer  | 2.3            | 6.7 | 93.2              | 275    | 15             | -83.58                               | -14.11                                                       |
| 5g5g     | B     | Hetero3  | 1.7            | 9   | 96.8              | 318    | 15             | -130.89                              | 4.68                                                         |
| 1ecf     | A     | Homo4    | 2              | 5.3 | 92                | 504    | 16             | -165.18                              | 30.39                                                        |
| 1ej0     | A     | Monomer  | 1.5            | 8.6 | 92.5              | 180    | 16             | -72.93                               | 5.96                                                         |
| 2iea     | A     | Homo2    | 1.85           | 5.5 | 80.7 <sup>2</sup> | 886    | 16             | -199.27                              | -14.33                                                       |
| 2p0b     | A     | Monomer  | 1.74           | 6.6 | 54.4              | 163    | 16             | -10.95                               | -21.51                                                       |

| PDB Code | Chain | Bio Unit | Resolution (Å) | pI  | AI    | Length | Solubility (%) | $\Delta W^{\text{total}}$ (kcal/mol) | $\Delta W^{\text{insol}} - \Delta W^{\text{sol}}$ (kcal/mol) |
|----------|-------|----------|----------------|-----|-------|--------|----------------|--------------------------------------|--------------------------------------------------------------|
| 2y8p     | A     | Monomer  | 2              | 8   | 82.1  | 194    | 16             | -71.93                               | -13.82                                                       |
| 2zpm     | A     | Monomer  | 0.98           | 6.4 | 108.1 | 91     | 16             | -31.60                               | 6.67                                                         |
| 3d1g     | A     | Homo2    | 1.64           | 5.3 | 94    | 366    | 16             | -98.98                               | 2.97                                                         |
| 3lbn     | A     | Homo4    | 1.48           | 6.7 | 93.5  | 319    | 16             | -147.42                              | -0.10                                                        |
| 4dzd     | A     | Monomer  | 2              | 9.7 | 94.8  | 218    | 16             | -62.93                               | -7.53                                                        |
| 1ns5     | A     | Homo2    | 1.68           | 8.7 | 92.6  | 155    | 17             | -71.98                               | -4.24                                                        |
| 3abq     | B     | Hetero12 | 2.05           | 6.5 | 90.2  | 306    | 17             | -149.84                              | 16.77                                                        |
| 3tlq     | A     | Monomer  | 1.91           | 5.6 | 106.8 | 242    | 17             | -120.90                              | -19.39                                                       |
| 4isa     | A     | Monomer  | 1.8            | 5.5 | 91.4  | 300    | 17             | -80.69                               | 12.38                                                        |
| 1d2f     | A     | Homo2    | 2.5            | 5.3 | 88.4  | 390    | 18             | -172.24                              | -35.22                                                       |
| 2rgk     | A     | Homo6    | 2.5            | 5.9 | 76.5  | 421    | 18             | -144.93                              | -66.03                                                       |
| 3i3q     | A     | Monomer  | 1.4            | 8.9 | 79.2  | 211    | 18             | -70.21                               | -30.86                                                       |
| 4mn4     | A     | Hetero4  | 2.3            | 8.6 | 86.8  | 259    | 18             | -56.34                               | 21.10                                                        |
| 1brm     | A     | Homo2    | 2.5            | 5.4 | 95.1  | 367    | 19             | -173.67                              | 2.73                                                         |
| 1cyw     | A     | Homo2    | 2.5            | 5.3 | 60.1  | 205    | 19             | -39.93                               | -5.58                                                        |
| 1k92     | A     | Homo4    | 1.6            | 5.5 | 81.7  | 455    | 19             | -103.06                              | -20.52                                                       |
| 1sdi     | A     | Monomer  | 1.65           | 9.3 | 112.7 | 213    | 19             | -150.56                              | -11.03                                                       |
| 3d2y     | A     | Monomer  | 1.75           | 6.4 | 83.5  | 261    | 19             | -45.40                               | -35.64                                                       |
| 1id0     | A     | Monomer  | 1.6            | 4.8 | 95.5  | 152    | 20             | -54.50                               | 7.14                                                         |
| 1l2p     | A     | Monomer  | 1.55           | 9.2 | 80.3  | 61     | 20             | -23.56                               | 7.64                                                         |
| 2icu     | A     | Monomer  | 1.6            | 5.2 | 73.8  | 229    | 20             | -69.70                               | -23.99                                                       |
| 2wsk     | A     | Monomer  | 2.25           | 5.7 | 83.7  | 657    | 20             | -147.99                              | -140.37                                                      |
| 3b8o     | A     | Homo8    | 2.4            | 5.2 | 76.7  | 265    | 20             | -4.08                                | -25.00                                                       |
| 3gfh     | A     | Homo3    | 2.2            | 5.5 | 91.7  | 225    | 20             | -120.33                              | 13.76                                                        |
| 4dap     | A     | Monomer  | 2.2            | 6.5 | 81.4  | 234    | 20             | -49.73                               | -10.58                                                       |
| 4lov     | A     | Monomer  | 1.5            | 5.6 | 88.7  | 158    | 20             | -70.15                               | -6.12                                                        |
| 2o99     | A     | Homo2    | 1.7            | 6.4 | 93.4  | 182    | 21             | -59.72                               | 1.07                                                         |
| 4cvq     | A     | Homo2    | 2.1            | 5.9 | 93.3  | 431    | 21             | -136.14                              | -1.60                                                        |
| 4zvf     | A     | Monomer  | 1.15           | 8   | 93.6  | 172    | 21             | -72.62                               | 2.70                                                         |
| 2qja     | A     | Homo3    | 1.74           | 6.6 | 93.8  | 262    | 22             | -155.59                              | 33.64                                                        |
| 4bht     | A     | Homo6    | 2.5            | 6   | 79.9  | 447    | 22             | -182.56                              | 17.32                                                        |
| 4bjq     | A     | Homo2    | 2.1            | 9.5 | 102.7 | 78     | 22             | -28.32                               | 0.75                                                         |
| 1mug     | A     | Monomer  | 1.8            | 9.2 | 91.1  | 168    | 23             | -66.36                               | 1.97                                                         |
| 1owg     | B     | Homo2    | 2.1            | 9.3 | 69.6  | 94     | 23             | -14.04                               | 5.72                                                         |
| 1tke     | A     | Monomer  | 1.46           | 5.7 | 83.2  | 224    | 23             | -52.82                               | -4.90                                                        |
| 2r19     | A     | Homo4    | 2.16           | 7.1 | 72.8  | 159    | 23             | 3.66                                 | 7.81                                                         |
| 3dhx     | A     | Homo2    | 2.1            | 5.4 | 84.6  | 106    | 23             | -35.91                               | 4.35                                                         |
| 3foz     | A     | Homo2    | 2.5            | 5.7 | 96.5  | 316    | 23             | -125.86                              | -12.54                                                       |
| 4xpu     | A     | Monomer  | 2.4            | 7.9 | 93.6  | 217    | 23             | -78.91                               | -7.60                                                        |
| 1aj2     | A     | Monomer  | 2              | 5.7 | 97.6  | 282    | 24             | -139.13                              | 13.25                                                        |
| 1ako     | A     | Monomer  | 1.7            | 5.8 | 77.5  | 268    | 24             | -39.08                               | -2.40                                                        |
| 1txk     | A     | Monomer  | 2.5            | 6.4 | 69.7  | 498    | 24             | 13.94                                | -40.23                                                       |
| 3brq     | A     | Homo2    | 2              | 6.1 | 99.3  | 296    | 24             | -108.80                              | -10.97                                                       |
| 3ca8     | A     | Monomer  | 1.8            | 5.5 | 92.1  | 266    | 24             | -124.57                              | -35.10                                                       |
| 2rdz     | A     | Homo2    | 1.74           | 6.3 | 65.8  | 452    | 25             | -19.60                               | -37.74                                                       |
| 1eq2     | A     | Homo5    | 2              | 4.8 | 78.4  | 310    | 26             | -73.26                               | 19.69                                                        |
| 1zp3     | A     | Homo2    | 1.85           | 6.2 | 84.1  | 304    | 26             | -118.19                              | -20.42                                                       |
| 2hds     | A     | Monomer  | 1.16           | 8.8 | 85.9  | 358    | 26             | -105.76                              | -28.32                                                       |
| 4h8a     | A     | Homo2    | 1.64           | 5.8 | 86.1  | 339    | 26             | -137.25                              | -9.62                                                        |
| 4iff     | A     | Homo2    | 2.3            | 4.4 | 81.7  | 86     | 26             | -11.62                               | -1.68                                                        |
| 4kie     | A     | Monomer  | 1.7            | 5.9 | 99.3  | 279    | 26             | -115.49                              | 8.64                                                         |
| 1a3a     | A     | Homo2    | 1.8            | 4.9 | 100.8 | 148    | 27             | -83.16                               | 25.51                                                        |
| 4xb6     | A     | Hetero6  | 1.7            | 6.5 | 82.2  | 150    | 27             | -44.07                               | -15.97                                                       |
| 1b12     | A     | Monomer  | 1.95           | 5.5 | 74.6  | 248    | 28             | 7.62                                 | 0.55                                                         |
| 1cl1     | A     | Homo4    | 1.83           | 6   | 95.4  | 395    | 28             | -193.71                              | -21.02                                                       |

| PDB Code | Chain | Bio Unit | Resolution (Å) | pI  | AI    | Length | Solubility (%) | $\Delta W^{\text{total}}$ (kcal/mol) | $\Delta W^{\text{insol}} - \Delta W^{\text{sol}}$ (kcal/mol) |
|----------|-------|----------|----------------|-----|-------|--------|----------------|--------------------------------------|--------------------------------------------------------------|
| 2dbi     | A     | Monomer  | 2.05           | 5.7 | 76.5  | 461    | 28             | -105.22                              | -53.22                                                       |
| 1nnx     | A     | Monomer  | 1.45           | 4.7 | 74    | 109    | 29             | -6.56                                | 14.52                                                        |
| 1d9e     | A     | Homo4    | 2.4            | 6.3 | 91.3  | 284    | 30             | -89.91                               | 25.01                                                        |
| 1qtq     | A     | Monomer  | 2.25           | 5.9 | 78.3  | 553    | 30             | -50.81                               | -69.77                                                       |
| 2iw1     | A     | Monomer  | 1.5            | 7.2 | 82.5  | 374    | 30             | -136.87                              | -14.86                                                       |
| 3zdb     | A     | Homo2    | 1.47           | 6.2 | 90.2  | 251    | 30             | -95.98                               | -27.80                                                       |
| 1iye     | A     | Homo6    | 1.82           | 5.5 | 84.3  | 309    | 31             | -90.20                               | -17.47                                                       |
| 1ks9     | A     | Monomer  | 1.7            | 5.5 | 104.6 | 291    | 31             | -140.65                              | -13.11                                                       |
| 3htv     | A     | Homo2    | 1.95           | 6.6 | 87.6  | 310    | 31             | -114.58                              | -15.42                                                       |
| 1hzt     | A     | Monomer  | 1.7            | 6.2 | 79.1  | 190    | 32             | -21.06                               | -24.89                                                       |
| 1kg2     | A     | Monomer  | 1.2            | 9.4 | 82.8  | 225    | 32             | -113.86                              | -30.56                                                       |
| 2hqs     | A     | Hetero2  | 1.5            | 6.8 | 74.5  | 415    | 32             | -12.62                               | -30.03                                                       |
| 2pqx     | A     | Monomer  | 1.42           | 8.6 | 64.3  | 245    | 32             | -60.69                               | -19.72                                                       |
| 2qdf     | A     | Monomer  | 2.2            | 5.7 | 89.8  | 335    | 32             | -63.89                               | 26.37                                                        |
| 2x5j     | O     | Homo4    | 2.3            | 6.3 | 98.1  | 339    | 32             | -142.23                              | -5.74                                                        |
| 3edc     | A     | Homo4    | 2.1            | 6.4 | 103.5 | 360    | 32             | -153.09                              | -9.77                                                        |
| 3n37     | A     | Homo2    | 1.65           | 4.7 | 87.2  | 319    | 32             | -65.04                               | -19.37                                                       |
| 3sxu     | B     | Hetero2  | 1.85           | 5.5 | 98.3  | 138    | 32             | -54.67                               | -13.90                                                       |
| 4bin     | A     | Monomer  | 2.49           | 9.4 | 86.4  | 403    | 33             | -60.64                               | 17.98                                                        |
| 1bf6     | A     | Monomer  | 1.7            | 5.3 | 86.8  | 291    | 34             | -85.61                               | 10.12                                                        |
| 2y4d     | A     | Homo2    | 2              | 6.1 | 82.6  | 403    | 34             | -44.25                               | -32.20                                                       |
| 3glc     | A     | Homo10   | 2.5            | 6.1 | 87    | 295    | 34             | -129.28                              | 21.62                                                        |
| 3l9w     | A     | Homo2    | 1.75           | 6.1 | 84.4  | 413    | 34             | -119.11                              | -25.66                                                       |
| 3by8     | A     | Monomer  | 1.45           | 8.3 | 96.9  | 142    | 35             | -63.60                               | 5.49                                                         |
| 1nxu     | A     | Homo2    | 1.8            | 5.2 | 87.4  | 333    | 37             | -83.15                               | -20.96                                                       |
| 1vh4     | A     | Homo2    | 1.75           | 6.4 | 89.8  | 435    | 37             | -52.52                               | -43.28                                                       |
| 2bjw     | A     | Monomer  | 1.75           | 5.1 | 96.8  | 265    | 37             | -85.69                               | -13.35                                                       |
| 2dg5     | B     | Hetero2  | 1.6            | 5.1 | 85.1  | 190    | 37             | -36.05                               | 13.11                                                        |
| 3a7r     | A     | Monomer  | 2.05           | 5.7 | 82.3  | 337    | 37             | -78.15                               | -52.38                                                       |
| 3fwz     | A     | Homo2    | 1.79           | 4.9 | 115   | 140    | 37             | -92.82                               | 18.47                                                        |
| 4hl6     | A     | Homo2    | 2.12           | 6.1 | 84.4  | 401    | 37             | -117.68                              | -22.76                                                       |
| 1bia     | A     | Monomer  | 2.3            | 7.8 | 110   | 321    | 38             | -138.48                              | 1.28                                                         |
| 1j1v     | A     | Monomer  | 2.1            | 9.3 | 90.3  | 94     | 38             | -26.70                               | -7.70                                                        |
| 1jke     | A     | Homo2    | 1.55           | 4.8 | 86.7  | 145    | 38             | -60.78                               | 11.16                                                        |
| 1ydy     | A     | Homo2    | 1.7            | 5.4 | 75.6  | 356    | 39             | -15.01                               | 7.27                                                         |
| 3nre     | A     | Monomer  | 1.59           | 4.8 | 68.4  | 291    | 39             | -35.80                               | -61.69                                                       |
| 4auk     | A     | Monomer  | 1.9            | 7.6 | 79.8  | 375    | 39             | -120.90                              | -40.77                                                       |
| 4d02     | A     | Homo2    | 1.76           | 5   | 80    | 479    | 39             | -105.20                              | -10.72                                                       |
| 1sq5     | A     | Homo2    | 2.2            | 6.3 | 99.7  | 308    | 40             | -93.19                               | -8.13                                                        |
| 1fhu     | A     | Monomer  | 1.65           | 4.8 | 99.4  | 320    | 41             | -85.71                               | -17.48                                                       |
| 1gnk     | A     | Homo3    | 2              | 5.8 | 114   | 112    | 41             | -38.25                               | 33.52                                                        |
| 1ivn     | A     | Monomer  | 1.9            | 6.3 | 87.9  | 190    | 41             | -62.35                               | -20.17                                                       |
| 3ipo     | A     | Homo2    | 2.4            | 6   | 75.4  | 416    | 41             | -90.54                               | -68.45                                                       |
| 2i82     | A     | Monomer  | 2.05           | 7.8 | 83.6  | 217    | 44             | -7.43                                | 3.74                                                         |
| 2oug     | A     | Monomer  | 2.1            | 8.6 | 93.3  | 162    | 44             | -41.50                               | 0.41                                                         |
| 2yh9     | A     | Homo6    | 1.8            | 6.7 | 68.6  | 88     | 44             | -13.33                               | -6.64                                                        |
| 3atp     | A     | Homo2    | 2.5            | 5   | 76.5  | 170    | 44             | -18.19                               | -24.89                                                       |
| 3hwo     | A     | Monomer  | 2.3            | 5.6 | 83.9  | 394    | 44             | -125.06                              | -23.24                                                       |
| 3l6i     | A     | Monomer  | 2.01           | 6.5 | 85.1  | 181    | 45             | -13.56                               | 24.62                                                        |
| 1mxr     | A     | Homo2    | 1.42           | 4.7 | 92.8  | 375    | 46             | -62.68                               | -30.41                                                       |
| 3fmy     | A     | Homo2    | 1.4            | 9.5 | 90.8  | 73     | 46             | -22.88                               | 9.03                                                         |
| 3lpf     | A     | Homo4    | 2.26           | 5.3 | 77.5  | 605    | 46             | -30.32                               | -63.73                                                       |
| 4ou6     | A     | Homo5    | 1.96           | 6.9 | 83.5  | 76     | 46             | -19.11                               | -9.36                                                        |
| 1oyw     | A     | Monomer  | 1.8            | 6.9 | 92.9  | 523    | 47             | -179.83                              | -27.67                                                       |
| 1rg9     | A     | Homo4    | 2.5            | 5.1 | 86.9  | 383    | 48             | -59.48                               | 24.04                                                        |

| PDB Code | Chain | Bio Unit | Resolution (Å) | pI  | AI    | Length | Solubility (%) | $\Delta W^{\text{total}}$ (kcal/mol) | $\Delta W^{\text{insol}} - \Delta W^{\text{sol}}$ (kcal/mol) |
|----------|-------|----------|----------------|-----|-------|--------|----------------|--------------------------------------|--------------------------------------------------------------|
| 1f0k     | A     | Homo2    | 1.9            | 9.6 | 93.6  | 364    | 49             | -226.69                              | 13.46                                                        |
| 1qsg     | A     | Homo4    | 1.75           | 5.7 | 91.4  | 265    | 49             | -145.06                              | 5.12                                                         |
| 1u2m     | A     | Hetero3  | 2.3            | 9.5 | 76.4  | 143    | 49             | -35.90                               | 10.08                                                        |
| 2fsu     | A     | Monomer  | 1.7            | 6   | 100.4 | 210    | 49             | -75.56                               | -5.48                                                        |
| 4k22     | A     | Homo4    | 2              | 6.6 | 93.1  | 365    | 49             | -148.62                              | -33.52                                                       |
| 2gqr     | A     | Homo2    | 2              | 5.1 | 88    | 237    | 50             | 26.65                                | 11.47                                                        |
| 3a2z     | A     | Monomer  | 1.5            | 4.5 | 80.1  | 197    | 50             | -47.71                               | -15.56                                                       |
| 3h9c     | A     | Monomer  | 1.4            | 5.6 | 77.4  | 547    | 50             | -140.75                              | -42.24                                                       |
| 1dnl     | A     | Homo2    | 1.8            | 9.4 | 82.3  | 199    | 51             | -21.52                               | -18.13                                                       |
| 1v58     | A     | Homo2    | 1.7            | 7.4 | 80.2  | 241    | 51             | -71.49                               | 4.31                                                         |
| 3gwi     | A     | Monomer  | 1.6            | 6   | 96.9  | 170    | 51             | -32.23                               | -5.78                                                        |
| 3my2     | A     | Monomer  | 2.2            | 6.1 | 77.4  | 175    | 51             | -0.18                                | -7.32                                                        |
| 1dwk     | A     | Homo10   | 1.65           | 5   | 112   | 156    | 52             | -55.93                               | 3.77                                                         |
| 1k2x     | B     | Hetero4  | 1.65           | 4.4 | 86.8  | 143    | 52             | -80.57                               | 10.58                                                        |
| 1k7j     | A     | Monomer  | 1.4            | 6   | 90.8  | 206    | 52             | -66.54                               | 15.25                                                        |
| 1r9l     | A     | Monomer  | 1.59           | 5.7 | 73.7  | 309    | 52             | -96.33                               | -33.87                                                       |
| 2aco     | A     | Homo2    | 1.8            | 9   | 67.6  | 173    | 52             | -28.08                               | -13.23                                                       |
| 2o1c     | A     | Monomer  | 1.8            | 5.8 | 89.1  | 150    | 53             | -55.72                               | -3.30                                                        |
| 1fua     | A     | Homo4    | 1.92           | 6.1 | 101.7 | 215    | 54             | -111.79                              | -7.02                                                        |
| 1k6d     | A     | Homo2    | 1.9            | 5.1 | 108.1 | 220    | 54             | -95.19                               | 20.11                                                        |
| 1ef8     | A     | Homo3    | 1.85           | 5.7 | 98.2  | 261    | 56             | -109.98                              | 14.81                                                        |
| 1xnf     | A     | Homo2    | 1.98           | 4.5 | 94.1  | 275    | 56             | -41.90                               | -24.49                                                       |
| 2ab0     | A     | Homo2    | 1.1            | 5.8 | 107.5 | 205    | 56             | -123.66                              | 12.72                                                        |
| 1vhm     | A     | Homo2    | 2.1            | 5.2 | 102   | 195    | 57             | -74.90                               | -1.22                                                        |
| 1eq7     | A     | Homo3    | 1.9            | 6   | 71.6  | 56     | 58             | -16.65                               | -1.24                                                        |
| 2fsh     | A     | Homo2    | 2              | 5.3 | 87.8  | 853    | 58             | -107.63                              | 21.10                                                        |
| 2pjp     | A     | Monomer  | 2.3            | 5.5 | 79.9  | 121    | 58             | -27.88                               | -8.27                                                        |
| 1or7     | C     | Hetero2  | 2              | 4.7 | 73.8  | 90     | 59             | -15.52                               | -1.43                                                        |
| 2qzb     | A     | Monomer  | 2.1            | 4.9 | 69.3  | 166    | 59             | -40.35                               | -2.57                                                        |
| 3ffv     | A     | Monomer  | 2              | 4.9 | 89.5  | 181    | 59             | -44.07                               | -18.02                                                       |
| 1cs0     | B     | Hetero8  | 2              | 5.9 | 87.9  | 382    | 60             | -86.96                               | 3.56                                                         |
| 3f1l     | A     | Homo2    | 0.95           | 7.7 | 82.5  | 252    | 60             | -114.88                              | -19.50                                                       |
| 3rfa     | A     | Monomer  | 2.05           | 6.6 | 88.1  | 404    | 60             | -111.51                              | -0.41                                                        |
| 1hxq     | A     | Homo2    | 1.86           | 6   | 69.3  | 348    | 61             | -8.61                                | -51.11                                                       |
| 1k6k     | A     | Monomer  | 1.8            | 5.3 | 99.6  | 143    | 61             | -67.12                               | -5.29                                                        |
| 3ucs     | C     | Hetero4  | 1.87           | 6.1 | 58.1  | 74     | 61             | -12.96                               | -3.31                                                        |
| 1a99     | A     | Homo2    | 2.2            | 5.5 | 85.6  | 344    | 62             | -111.58                              | -4.41                                                        |
| 2gq1     | A     | Homo4    | 1.4            | 5.7 | 86.3  | 332    | 62             | -75.12                               | 6.01                                                         |
| 3u0o     | A     | Homo2    | 2.25           | 5.3 | 92    | 347    | 62             | -153.43                              | 45.39                                                        |
| 2xap     | A     | Homo6    | 2.1            | 5.8 | 87.1  | 761    | 63             | -204.00                              | -56.52                                                       |
| 2xuv     | A     | Homo2    | 1.5            | 4.9 | 65.4  | 79     | 63             | -25.19                               | -7.97                                                        |
| 3o1f     | A     | Monomer  | 1.4            | 5.2 | 93.8  | 81     | 63             | -44.62                               | -1.94                                                        |
| 1h5r     | A     | Homo4    | 1.9            | 5.4 | 92.9  | 293    | 64             | -108.27                              | -1.32                                                        |
| 2nul     | A     | Homo2    | 2.1            | 5.5 | 70.1  | 164    | 64             | -35.25                               | 8.89                                                         |
| 4a6v     | A     | Monomer  | 1.46           | 5.6 | 93.7  | 265    | 64             | -91.04                               | 26.05                                                        |
| 4aq4     | A     | Monomer  | 1.8            | 6.1 | 62.7  | 419    | 64             | -81.99                               | -24.75                                                       |
| 4jak     | A     | Homo2    | 2              | 6.6 | 84.2  | 167    | 64             | -61.46                               | -3.63                                                        |
| 2hur     | A     | Homo4    | 1.62           | 5.6 | 81.8  | 142    | 65             | -51.26                               | 5.77                                                         |
| 3f4l     | A     | Homo2    | 2              | 6.1 | 82.2  | 345    | 65             | -42.63                               | 1.81                                                         |
| 1q2l     | A     | Monomer  | 2.2            | 5.7 | 82.1  | 939    | 66             | -181.87                              | -57.33                                                       |
| 3a5y     | A     | Homo2    | 1.9            | 5.6 | 81.5  | 345    | 66             | -38.56                               | -24.19                                                       |
| 3qd7     | X     | Monomer  | 2.3            | 8.9 | 96.1  | 137    | 66             | -37.39                               | -18.16                                                       |
| 4keh     | A     | Hetero4  | 1.9            | 6.2 | 88.9  | 171    | 66             | -66.27                               | 11.02                                                        |
| 1i52     | A     | Monomer  | 1.5            | 6.2 | 93.9  | 236    | 67             | -111.69                              | -7.15                                                        |
| 1knw     | A     | Homo2    | 2.1            | 5.8 | 94.3  | 425    | 67             | -168.59                              | -13.65                                                       |

| PDB Code | Chain | Bio Unit | Resolution (Å) | pI   | AI    | Length | Solubility (%) | $\Delta W^{\text{total}}$ (kcal/mol) | $\Delta W^{\text{insol}} - \Delta W^{\text{sol}}$ (kcal/mol) |
|----------|-------|----------|----------------|------|-------|--------|----------------|--------------------------------------|--------------------------------------------------------------|
| 1q0n     | A     | Monomer  | 1.25           | 5.3  | 99.4  | 158    | 67             | -49.61                               | -9.10                                                        |
| 1xeo     | A     | Monomer  | 1.3            | 5.2  | 112.6 | 168    | 67             | -29.53                               | 11.30                                                        |
| 3qas     | A     | Homo2    | 1.7            | 6.5  | 83.8  | 253    | 67             | -97.43                               | -15.80                                                       |
| 1ni9     | A     | Monomer  | 2              | 5.4  | 102.2 | 338    | 69             | -170.22                              | 65.90                                                        |
| 2d3w     | A     | Homo4    | 2.5            | 4.9  | 97.8  | 248    | 69             | -70.84                               | 22.93                                                        |
| 4d79     | A     | Homo2    | 1.77           | 8.7  | 89.1  | 276    | 69             | -157.41                              | 17.53                                                        |
| 1gyn     | A     | Homo2    | 2              | 5.5  | 85.2  | 358    | 70             | -157.55                              | 13.00                                                        |
| 1hru     | A     | Homo2    | 2              | 4.9  | 93.9  | 188    | 70             | -100.57                              | -3.20                                                        |
| 1s5u     | A     | Homo4    | 1.7            | 7.2  | 85.4  | 138    | 70             | -25.28                               | 0.27                                                         |
| 1xvi     | A     | Homo2    | 2.26           | 5    | 90.5  | 275    | 70             | -94.19                               | -2.76                                                        |
| 2yva     | A     | Homo4    | 1.85           | 5.3  | 101.2 | 196    | 70             | -111.15                              | -3.17                                                        |
| 1iwl     | A     | Monomer  | 1.65           | 5.6  | 61.1  | 182    | 71             | 26.82                                | -20.29                                                       |
| 1q08     | A     | Homo2    | 1.9            | 6.4  | 93.6  | 99     | 71             | -29.48                               | -7.28                                                        |
| 3grh     | A     | Monomer  | 1.7            | 5.9  | 72.6  | 422    | 71             | -76.95                               | -28.09                                                       |
| 3r2q     | A     | Homo2    | 1.05           | 5.1  | 104.3 | 202    | 71             | -77.17                               | -1.39                                                        |
| 1fvk     | A     | Homo2    | 1.7            | 5.4  | 76.3  | 189    | 72             | -59.62                               | 15.62                                                        |
| 1oro     | A     | Homo2    | 2.4            | 5.3  | 96.7  | 213    | 72             | -99.46                               | 20.94                                                        |
| 1woc     | A     | Homo4    | 2              | 8.5  | 90.8  | 103    | 72             | -19.99                               | -7.85                                                        |
| 4wep     | A     | Monomer  | 1.5            | 8    | 86.2  | 297    | 72             | -101.27                              | 13.39                                                        |
| 1t3d     | A     | Homo6    | 2.2            | 6.5  | 92.9  | 289    | 73             | -114.76                              | 6.88                                                         |
| 2rn2     | A     | Monomer  | 1.48           | 8.4  | 73.7  | 155    | 73             | -37.97                               | -14.32                                                       |
| 3o52     | A     | Homo2    | 2.5            | 4.9  | 97.4  | 191    | 73             | -20.34                               | 12.80                                                        |
| 4dy3     | A     | Monomer  | 1.8            | 9    | 62.3  | 111    | 73             | 7.79                                 | 2.60                                                         |
| 3hi2     | B     | Hetero2  | 2              | 8.8  | 93.5  | 101    | 74             | -28.89                               | 4.52                                                         |
| 3tch     | A     | Monomer  | 1.98           | 6.1  | 78.5  | 524    | 74             | -49.21                               | -25.34                                                       |
| 1eum     | A     | Homo24   | 2.05           | 4.8  | 75.8  | 165    | 75             | 1.64                                 | -22.83                                                       |
| 1pyu     | A     | Hetero8  | 1.9            | 10.9 | 71.2  | 41     | 75             | 1.67                                 | 1.12                                                         |
| 1wl9     | A     | Homo4    | 1.9            | 5.3  | 89.8  | 440    | 75             | -113.68                              | 6.27                                                         |
| 1q8r     | A     | Homo2    | 1.9            | 9.6  | 79.7  | 120    | 76             | -36.72                               | 3.15                                                         |
| 1qu9     | A     | Homo3    | 1.2            | 5.4  | 96.8  | 128    | 76             | -32.84                               | 28.93                                                        |
| 1rya     | A     | Homo2    | 1.3            | 5.1  | 79.8  | 160    | 76             | -44.32                               | -20.39                                                       |
| 2cx6     | A     | Monomer  | 2.43           | 4.5  | 93.1  | 90     | 76             | -37.26                               | -1.54                                                        |
| 2uvk     | A     | Homo2    | 1.5            | 6.7  | 68.1  | 357    | 76             | -78.04                               | -4.56                                                        |
| 2x26     | A     | Monomer  | 1.75           | 8.6  | 92.9  | 308    | 76             | -112.49                              | -3.33                                                        |
| 3ctl     | A     | Homo6    | 2.2            | 5.3  | 90.9  | 231    | 76             | -89.17                               | 16.27                                                        |
| 3rer     | A     | Homo6    | 1.7            | 9.7  | 112.3 | 65     | 76             | -19.22                               | 2.43                                                         |
| 1gsa     | A     | Homo4    | 2              | 5.1  | 93.5  | 316    | 77             | -73.19                               | 29.26                                                        |
| 1hpu     | A     | Monomer  | 1.85           | 5.4  | 78    | 525    | 77             | -68.89                               | 26.59                                                        |
| 1psu     | A     | Homo2    | 2.2            | 6.3  | 76.1  | 140    | 77             | -66.93                               | -3.35                                                        |
| 1rrm     | A     | Homo2    | 1.6            | 5    | 95.1  | 386    | 77             | -215.44                              | 51.75                                                        |
| 1s16     | A     | Monomer  | 2.1            | 5.8  | 88.2  | 390    | 77             | -113.06                              | 3.10                                                         |
| 1sff     | A     | Homo4    | 1.9            | 5.8  | 95.8  | 426    | 77             | -201.67                              | 51.46                                                        |
| 3qmq     | A     | Homo2    | 2.2            | 5.7  | 76.7  | 99     | 77             | 1.77                                 | -3.07                                                        |
| 1eua     | A     | Homo3    | 1.95           | 5.6  | 106.8 | 213    | 78             | -173.74                              | 32.57                                                        |
| 1zgz     | A     | Homo2    | 1.8            | 5    | 118.1 | 122    | 78             | -53.36                               | 5.14                                                         |
| 2g2n     | A     | Homo4    | 1.65           | 8.2  | 77.8  | 114    | 78             | -13.15                               | -6.99                                                        |
| 2oml     | A     | Monomer  | 1.2            | 9.6  | 85.1  | 189    | 78             | -40.84                               | -11.28                                                       |
| 4k49     | A     | Homo2    | 1.89           | 7    | 96    | 136    | 78             | -57.08                               | -6.72                                                        |
| 1n57     | A     | Homo2    | 1.6            | 5.9  | 80.2  | 291    | 79             | -85.67                               | 7.02                                                         |
| 1ujc     | A     | Monomer  | 1.9            | 4.5  | 99.3  | 161    | 79             | -76.19                               | -1.52                                                        |
| 1yrr     | A     | Homo4    | 2              | 5.7  | 100.4 | 382    | 79             | -179.25                              | 29.32                                                        |
| 3csu     | A     | Homo3    | 1.88           | 6.1  | 98.2  | 310    | 79             | -94.49                               | -8.53                                                        |
| 4cnd     | A     | Homo2    | 1.5            | 6.4  | 93.9  | 267    | 79             | -123.13                              | 18.32                                                        |
| 4kdc     | A     | Monomer  | 2.09           | 6.4  | 85.2  | 246    | 79             | -97.00                               | 6.69                                                         |
| 4qak     | A     | Monomer  | 2.03           | 10.5 | 85    | 177    | 79             | -54.14                               | -23.94                                                       |

| PDB Code | Chain | Bio Unit | Resolution (Å) | pI  | AI    | Length | Solubility (%) | $\Delta W^{\text{total}}$ (kcal/mol) | $\Delta W^{\text{insol}} - \Delta W^{\text{sol}}$ (kcal/mol) |
|----------|-------|----------|----------------|-----|-------|--------|----------------|--------------------------------------|--------------------------------------------------------------|
| 1ixh     | A     | Monomer  | 0.98           | 6.9 | 80.6  | 321    | 80             | -136.43                              | 12.17                                                        |
| 1q5y     | A     | Homo4    | 1.4            | 5.9 | 92.8  | 85     | 80             | -8.35                                | -9.10                                                        |
| 4qus     | A     | Homo2    | 1.28           | 4.8 | 90.9  | 149    | 80             | -29.96                               | 3.42                                                         |
| 1b79     | A     | Homo4    | 2.3            | 4.8 | 86.1  | 119    | 81             | -47.57                               | -8.11                                                        |
| 1jgs     | A     | Homo2    | 2.3            | 8.6 | 122.2 | 138    | 81             | -65.73                               | -1.56                                                        |
| 1qvc     | A     | Homo4    | 2.2            | 9.1 | 64.5  | 145    | 81             | -14.46                               | 9.22                                                         |
| 1rxy     | A     | Homo6    | 1.7            | 5.8 | 89.5  | 253    | 81             | -124.80                              | 16.91                                                        |
| 1yoe     | A     | Homo4    | 1.78           | 5.3 | 98.7  | 322    | 81             | -155.17                              | 19.51                                                        |
| 2eby     | A     | Homo2    | 2.25           | 5.7 | 99.3  | 113    | 81             | -50.06                               | 2.60                                                         |
| 2hqs     | C     | Hetero2  | 1.5            | 6.8 | 77.7  | 118    | 81             | -68.01                               | -1.89                                                        |
| 4ej1     | A     | Hetero2  | 1.75           | 4.8 | 84.7  | 159    | 81             | -47.48                               | -8.55                                                        |
| 5isv     | A     | Monomer  | 1.35           | 5.5 | 85.9  | 165    | 81             | -32.84                               | -2.30                                                        |
| 1c0a     | A     | Monomer  | 2.4            | 5.5 | 87.4  | 585    | 82             | -131.60                              | 23.93                                                        |
| 1eej     | A     | Homo2    | 1.9            | 5.9 | 84.5  | 216    | 82             | -74.21                               | 11.98                                                        |
| 1i7h     | A     | Homo4    | 1.7            | 4.5 | 87    | 111    | 82             | -43.76                               | -2.99                                                        |
| 1k0e     | A     | Monomer  | 2              | 5.1 | 87.7  | 453    | 82             | -102.96                              | -32.12                                                       |
| 1qy9     | A     | Homo2    | 2.05           | 5.8 | 92.3  | 297    | 82             | -118.59                              | 4.41                                                         |
| 1spv     | A     | Monomer  | 2              | 5.9 | 93.9  | 184    | 82             | -128.29                              | 1.45                                                         |
| 2ane     | A     | Homo8    | 2.03           | 6.1 | 99.8  | 125    | 82             | -37.02                               | 16.68                                                        |
| 1a6j     | A     | Homo4    | 2.35           | 5.6 | 103.6 | 163    | 83             | -74.46                               | 3.71                                                         |
| 2h28     | A     | Monomer  | 2.1            | 6.1 | 78.1  | 130    | 83             | -38.10                               | -15.24                                                       |
| 4eac     | A     | Monomer  | 2.3            | 5.8 | 81.3  | 414    | 83             | -63.95                               | -3.31                                                        |
| 4q2u     | A     | Hetero4  | 1.8            | 5.2 | 107.9 | 86     | 83             | -18.38                               | 9.35                                                         |
| 1fm0     | E     | Hetero2  | 1.45           | 5.3 | 73.5  | 150    | 84             | -49.67                               | 5.70                                                         |
| 1npd     | A     | Homo2    | 2.3            | 5   | 88.5  | 288    | 84             | -115.09                              | 14.43                                                        |
| 1u2k     | A     | Monomer  | 2              | 4.8 | 93.1  | 309    | 84             | -119.94                              | 9.46                                                         |
| 2a6q     | A     | Hetero3  | 2.05           | 5.3 | 84.1  | 86     | 84             | -26.82                               | 3.26                                                         |
| 3cqf     | A     | Homo4    | 1.98           | 5.3 | 99.8  | 309    | 84             | -191.22                              | 41.28                                                        |
| 4jhc     | A     | Homo2    | 1.85           | 6.3 | 85.8  | 215    | 84             | -29.78                               | 0.44                                                         |
| 1n8o     | E     | Hetero6  | 2              | 5.9 | 85.7  | 142    | 85             | -7.04                                | 15.16                                                        |
| 1onr     | A     | Monomer  | 1.87           | 5.1 | 99.8  | 316    | 85             | -117.48                              | 15.29                                                        |
| 1dfu     | P     | Monomer  | 1.8            | 9.6 | 86.2  | 94     | 86             | -18.06                               | 9.66                                                         |
| 2e3d     | A     | Homo4    | 1.95           | 5.1 | 102.6 | 302    | 86             | -93.09                               | 28.61                                                        |
| 2p2d     | A     | Homo4    | 1.89           | 6   | 87.2  | 358    | 86             | -134.06                              | 2.53                                                         |
| 2pv2     | A     | Homo2    | 1.3            | 5.8 | 97.7  | 103    | 86             | -54.22                               | 2.83                                                         |
| 1abe     | A     | Monomer  | 1.7            | 5.6 | 81.9  | 306    | 87             | -112.57                              | 37.67                                                        |
| 1gvh     | A     | Homo12   | 2.19           | 5.5 | 79.9  | 396    | 87             | -89.42                               | -22.76                                                       |
| 1opc     | A     | Monomer  | 1.95           | 7   | 78.9  | 110    | 87             | -27.18                               | -0.35                                                        |
| 2yh5     | A     | Monomer  | 1.25           | 5.7 | 76.8  | 127    | 87             | -44.80                               | -1.93                                                        |
| 1g8e     | A     | Homo2    | 1.8            | 6.5 | 107.7 | 116    | 88             | -43.87                               | -6.17                                                        |
| 1oms     | A     | Homo3    | 2.3            | 5.9 | 91.7  | 121    | 88             | -31.09                               | 10.80                                                        |
| 1poh     | A     | Monomer  | 2              | 5.6 | 84.9  | 85     | 88             | -37.24                               | 9.26                                                         |
| 1qfj     | A     | Monomer  | 2.2            | 5.3 | 93.8  | 232    | 88             | -107.66                              | 3.74                                                         |
| 1tq5     | A     | Monomer  | 1.76           | 5.7 | 78.6  | 242    | 88             | 27.42                                | -16.95                                                       |
| 1cmc     | A     | Homo2    | 1.8            | 5.4 | 78.9  | 104    | 89             | 10.46                                | -4.54                                                        |
| 1k4m     | A     | Homo3    | 1.9            | 5.5 | 92.1  | 213    | 89             | -71.95                               | -9.80                                                        |
| 1qyn     | A     | Homo4    | 2.35           | 4.3 | 78.4  | 153    | 89             | -58.05                               | -2.95                                                        |
| 1r62     | A     | Monomer  | 1.6            | 5.7 | 103   | 160    | 89             | -44.46                               | 9.24                                                         |
| 2dy0     | A     | Homo2    | 1.25           | 5.3 | 104.2 | 190    | 89             | -88.28                               | 31.35                                                        |
| 2trx     | A     | Monomer  | 1.68           | 4.7 | 104   | 108    | 89             | -44.65                               | 13.41                                                        |
| 4zck     | A     | Monomer  | 1.48           | 7.9 | 78.6  | 332    | 89             | -44.43                               | 7.68                                                         |
| 2vk2     | A     | Monomer  | 1.2            | 6.3 | 85.5  | 306    | 90             | -83.17                               | 48.52                                                        |
| 5i4c     | A     | Homo2    | 2              | 5.6 | 119.4 | 147    | 90             | -71.14                               | 24.84                                                        |
| 1i8d     | A     | Homo2    | 2              | 5.6 | 95.6  | 213    | 91             | -50.98                               | 30.53                                                        |
| 1kae     | A     | Homo2    | 1.7            | 5.1 | 93.4  | 434    | 91             | -214.48                              | 31.81                                                        |

| PDB Code | Chain | Bio Unit | Resolution (Å) | pI  | AI    | Length | Solubility (%) | $\Delta W^{\text{total}}$ (kcal/mol) | $\Delta W^{\text{insol}} - \Delta W^{\text{sol}}$ (kcal/mol) |
|----------|-------|----------|----------------|-----|-------|--------|----------------|--------------------------------------|--------------------------------------------------------------|
| 1moq     | A     | Homo2    | 1.57           | 5.3 | 105   | 368    | 91             | -143.61                              | 18.44                                                        |
| 1xs1     | A     | Homo3    | 1.8            | 5.6 | 97.1  | 193    | 91             | -33.67                               | 4.74                                                         |
| 1xxa     | A     | Homo6    | 2.2            | 4.1 | 123.9 | 78     | 91             | -41.14                               | 14.24                                                        |
| 2wci     | A     | Homo4    | 1.9            | 5.9 | 79.6  | 135    | 91             | -60.16                               | -14.82                                                       |
| 3qn0     | A     | Homo6    | 2.34           | 6.6 | 76    | 141    | 91             | -31.83                               | 4.07                                                         |
| 1ega     | A     | Homo2    | 2.4            | 6.7 | 100.1 | 301    | 92             | -86.38                               | 28.68                                                        |
| 1hnj     | A     | Homo2    | 1.46           | 5.1 | 96.1  | 317    | 92             | -191.90                              | 21.70                                                        |
| 2bh8     | A     | Homo4    | 1.9            | 6.6 | 70.5  | 101    | 92             | -11.97                               | 8.29                                                         |
| 3pvs     | A     | Homo4    | 2.5            | 6   | 83.3  | 447    | 92             | -156.02                              | -2.63                                                        |
| 1faj     | A     | Homo6    | 2.15           | 5   | 91.4  | 175    | 93             | -39.61                               | 23.01                                                        |
| 1gz0     | A     | Homo2    | 2.5            | 6.5 | 103   | 253    | 93             | -126.92                              | 5.42                                                         |
| 2gmw     | A     | Monomer  | 1.5            | 5.8 | 79.1  | 211    | 93             | -63.75                               | 2.27                                                         |
| 3i96     | A     | Homo6    | 1.65           | 5.9 | 105.8 | 119    | 93             | -85.68                               | 20.36                                                        |
| 4arc     | A     | Monomer  | 2              | 5.4 | 77.8  | 880    | 93             | -189.65                              | -17.45                                                       |
| 1d8l     | A     | Homo4    | 2.5            | 6.3 | 107.9 | 149    | 94             | -70.34                               | 11.36                                                        |
| 1o8b     | A     | Homo2    | 1.25           | 5.2 | 106.9 | 219    | 94             | -72.33                               | 38.75                                                        |
| 1pdo     | A     | Homo2    | 1.7            | 4.5 | 103.3 | 135    | 94             | -81.26                               | 22.38                                                        |
| 1qjc     | A     | Homo6    | 1.63           | 6.5 | 92.7  | 158    | 94             | -63.97                               | 4.11                                                         |
| 1x8d     | A     | Homo2    | 1.8            | 5.3 | 76    | 104    | 94             | -9.85                                | -18.10                                                       |
| 1bdo     | A     | Homo2    | 1.8            | 4.6 | 94.9  | 80     | 95             | -24.25                               | 17.62                                                        |
| 1hv9     | A     | Homo3    | 2.1            | 6.1 | 98.8  | 456    | 95             | -185.87                              | 69.13                                                        |
| 1k7k     | A     | Monomer  | 1.5            | 5.9 | 86.6  | 221    | 95             | -71.06                               | 7.89                                                         |
| 1kid     | A     | Monomer  | 1.7            | 5.7 | 100   | 203    | 95             | -93.59                               | 44.06                                                        |
| 1ptm     | A     | Homo2    | 1.96           | 5.9 | 108.5 | 329    | 95             | -167.73                              | 16.20                                                        |
| 3bmb     | A     | Monomer  | 1.91           | 4.5 | 105.4 | 136    | 95             | -62.25                               | 9.30                                                         |
| 3c8f     | A     | Monomer  | 2.25           | 6   | 79.8  | 245    | 95             | -75.39                               | -1.07                                                        |
| 1anf     | A     | Monomer  | 1.67           | 5.2 | 83.4  | 370    | 96             | -137.08                              | 24.33                                                        |
| 1xsq     | A     | Homo2    | 1.6            | 5.3 | 95.7  | 168    | 96             | -10.14                               | -7.48                                                        |
| 1y2g     | A     | Monomer  | 1.9            | 5.4 | 84.3  | 140    | 96             | -39.16                               | 5.92                                                         |
| 2y3q     | A     | Homo24   | 1.55           | 4.7 | 104.9 | 158    | 96             | 6.45                                 | -3.02                                                        |
| 1euw     | A     | Homo3    | 1.05           | 5   | 95.6  | 152    | 97             | -44.00                               | -1.91                                                        |
| 1iov     | A     | Monomer  | 2.2            | 4.8 | 98.5  | 306    | 97             | -143.07                              | 9.41                                                         |
| 3bb6     | A     | Homo4    | 2.3            | 6.3 | 72.2  | 127    | 97             | -6.19                                | -5.48                                                        |
| 3lvk     | B     | Hetero4  | 2.44           | 5.2 | 80.9  | 82     | 97             | -14.06                               | 8.55                                                         |
| 4mva     | A     | Homo2    | 1.43           | 5.9 | 90.4  | 279    | 97             | -131.36                              | 30.61                                                        |
| 1jxx     | A     | Homo2    | 1.6            | 5.5 | 94.9  | 212    | 98             | -101.63                              | 6.12                                                         |
| 1np6     | A     | Homo2    | 1.9            | 5.3 | 104.3 | 174    | 98             | -70.87                               | 22.15                                                        |
| 3g27     | A     | Homo2    | 2.1            | 8.3 | 87.5  | 96     | 98             | -30.43                               | -12.77                                                       |
| 4nfw     | A     | Monomer  | 2.3            | 5   | 86.7  | 153    | 98             | -41.01                               | -16.91                                                       |
| 4p1m     | A     | Homo4    | 1.95           | 6.3 | 78.6  | 123    | 98             | -34.29                               | 0.01                                                         |
| 1ag9     | A     | Homo2    | 1.8            | 4.2 | 87.6  | 175    | 99             | -72.42                               | 1.56                                                         |
| 1amf     | A     | Monomer  | 2.15           | 6.4 | 88.4  | 233    | 99             | -115.48                              | 19.60                                                        |
| 1ctf     | A     | Homo2    | 1.7            | 5   | 101.8 | 74     | 99             | -42.46                               | 22.96                                                        |
| 1u9l     | A     | Monomer  | 1.9            | 4.1 | 104.7 | 70     | 99             | -41.79                               | 9.38                                                         |
| 1f9z     | A     | Homo2    | 1.5            | 5   | 86.7  | 135    | 100            | -33.99                               | 12.94                                                        |
| 1gg1     | A     | Homo4    | 2              | 6.1 | 94.8  | 350    | 100            | -138.36                              | 11.46                                                        |
| 1zmr     | A     | Monomer  | 2.4            | 5.1 | 102.6 | 387    | 100            | -225.31                              | 58.25                                                        |
| 1vlo     | A     | Monomer  | 1.7            | 5.8 | 83.3  | 381    | 101            | -92.75                               | 19.80                                                        |
| 1x6i     | A     | Homo2    | 1.2            | 5.5 | 80.4  | 91     | 101            | -8.90                                | -8.34                                                        |
| 2h27     | A     | Monomer  | 2.3            | 5.8 | 108.2 | 73     | 101            | -35.40                               | 1.31                                                         |
| 3n3a     | C     | Hetero4  | 1.99           | 9.6 | 79    | 153    | 101            | -63.92                               | -6.33                                                        |
| 1h75     | A     | Monomer  | 1.7            | 7.9 | 74.8  | 81     | 103            | -40.44                               | -6.08                                                        |
| 2bz1     | A     | Homo2    | 1.54           | 5.6 | 99.5  | 196    | 103            | -52.82                               | 1.11                                                         |
| 1mzg     | A     | Homo2    | 2              | 6.7 | 100.3 | 146    | 104            | -47.85                               | -13.97                                                       |
| 2igi     | A     | Homo2    | 1.7            | 5   | 91.1  | 180    | 104            | -32.42                               | 3.26                                                         |



| PDB Code | Chain | Bio Unit | Resolution (Å) | pI  | AI    | Length | Solubility (%) | $\Delta W^{\text{total}}$ (kcal/mol) | $\Delta W^{\text{insol}} - \Delta W^{\text{sol}}$ (kcal/mol) |
|----------|-------|----------|----------------|-----|-------|--------|----------------|--------------------------------------|--------------------------------------------------------------|
| 4mte     | A     | Homo4    | 2.5            | 6   | 87.3  | 171    | 104            | -60.27                               | -3.39                                                        |
| 1ake     | A     | Monomer  | 2              | 5.6 | 89.3  | 214    | 105            | -52.20                               | 23.78                                                        |
| 1r2k     | A     | Homo2    | 2.1            | 5.7 | 86    | 169    | 105            | -63.68                               | -6.06                                                        |
| 2wcv     | A     | Homo10   | 1.9            | 5.6 | 110.9 | 140    | 105            | -62.06                               | 15.67                                                        |
| 3itf     | A     | Homo2    | 1.45           | 6.2 | 59.9  | 145    | 105            | -8.48                                | -7.53                                                        |
| 1nmn     | A     | Monomer  | 2.3            | 6.7 | 90.5  | 138    | 106            | -37.65                               | 11.57                                                        |
| 4ml2     | A     | Monomer  | 1.5            | 9.5 | 88.3  | 95     | 107            | 0.04                                 | 0.64                                                         |
| 1dj8     | A     | Homo2    | 2              | 4.7 | 67    | 89     | 108            | -28.59                               | 10.53                                                        |
| 1k4n     | A     | Monomer  | 1.6            | 5.4 | 92.5  | 192    | 108            | -60.55                               | -12.71                                                       |
| 3a6s     | A     | Monomer  | 1.8            | 5   | 83.2  | 129    | 108            | -23.47                               | 10.02                                                        |
| 1v4b     | A     | Homo2    | 1.8            | 5.1 | 101.5 | 200    | 109            | -86.79                               | 5.64                                                         |
| 2gq0     | A     | Monomer  | 1.9            | 5.6 | 81.2  | 303    | 109            | -40.53                               | -19.85                                                       |
| 3a5z     | B     | Hetero4  | 2.5            | 5   | 80.6  | 191    | 109            | -5.65                                | 1.22                                                         |
| 1fia     | A     | Homo2    | 2              | 9.3 | 86.4  | 98     | 110            | -18.49                               | 1.08                                                         |
| 2fu4     | A     | Homo2    | 1.8            | 5.5 | 101   | 83     | 110            | -35.88                               | 4.74                                                         |
| 4dt4     | A     | Monomer  | 1.35           | 4.9 | 82    | 169    | 110            | -51.25                               | 16.33                                                        |
| 1b93     | A     | Homo2    | 1.9            | 6.1 | 104.6 | 152    | 112            | -77.79                               | 1.41                                                         |
| 1fjj     | A     | Homo2    | 1.66           | 5.3 | 73.6  | 159    | 112            | -49.79                               | -25.98                                                       |
| 1cfz     | A     | Monomer  | 2.2            | 4.6 | 124   | 162    | 113            | -103.04                              | 33.99                                                        |
| 1ew4     | A     | Monomer  | 1.4            | 4.2 | 79.2  | 106    | 113            | -26.86                               | -19.92                                                       |
| 1f3z     | A     | Homo2    | 1.98           | 4.7 | 108.8 | 161    | 114            | -56.04                               | 42.44                                                        |
| 1s96     | A     | Homo2    | 2              | 6.4 | 83.3  | 219    | 115            | -46.71                               | -6.83                                                        |
| 3dpo     | A     | Homo2    | 2.1            | 5.1 | 87.9  | 219    | 116            | -15.00                               | 38.04                                                        |
| 2air     | B     | Hetero4  | 2              | 6.9 | 98.1  | 153    | 117            | -32.97                               | 1.20                                                         |
| 1tuv     | A     | Homo2    | 1.7            | 6.4 | 89.8  | 114    | 121            | -28.01                               | 4.28                                                         |
| 1scz     | A     | Homo24   | 2.2            | 8.7 | 97.4  | 233    | 122            | -65.86                               | 14.97                                                        |
| 4ynx     | A     | Homo2    | 1.5            | 9.8 | 81.4  | 66     | 130            | 2.91                                 | 8.34                                                         |
| 1jyh     | A     | Monomer  | 1.8            | 4.6 | 74.4  | 157    | 133            | -28.68                               | 6.06                                                         |

**Table S2. Insolubilizing residue-residue interactions**, defined by  $\mathcal{M} < 0$  and the relaxed significance criteria requiring the  $|\mathcal{M}|$  or  $\mathcal{V}$  values to be higher than 95% of the equivalent quantities computed from randomly shuffled datasets ( $\text{Sig}\mathcal{M}$  or  $\text{Sig}\mathcal{V} \geq 0.95$ ).

| Interactions        | Residue pairs | $\mathcal{M}$ | $\text{Sig}\mathcal{M}$ | $\mathcal{V}$ | $\text{Sig}\mathcal{V}$ |
|---------------------|---------------|---------------|-------------------------|---------------|-------------------------|
| $\pi$ - $\pi$       | TRP-PHE       | -0.207        | 1                       | 0.052         | 1                       |
|                     | TYR-TRP       | -0.177        | 1                       | 0.038         | 0.99                    |
|                     | TRP-TRP       | -0.412        | 0.99                    | 0.181         | 0.99                    |
|                     | TYR-PHE       | -0.124        | 0.97                    | 0.019         | 0.99                    |
| His- $\pi$          | HIS-TYR       | -0.155        | 1                       | 0.038         | 0.99                    |
|                     | HIS-TRP       | -0.191        | 0.99                    | 0.063         | 1                       |
|                     | HIS-PHE       | -0.122        | 0.96                    | 0.022         | 0.95                    |
| Cation- $\pi$       | ARG-TRP       | -0.238        | 1                       | 0.074         | 1                       |
|                     | ARG-PHE       | -0.120        | 0.99                    | 0.017         | 0.99                    |
|                     | ARG-TYR       | -0.101        | 0.98                    | 0.017         | 0.98                    |
|                     | LYS-TRP       | -0.162        | 0.97                    | 0.068         | 0.98                    |
| Amino- $\pi$        | GLN -TRP      | -0.359        | 1                       | 0.135         | 1                       |
|                     | GLN-PHE       | -0.128        | 1                       | 0.028         | 1                       |
|                     | ASN-PHE       | -0.140        | 1                       | 0.024         | 0.99                    |
|                     | ASN-TRP       | -0.183        | 1                       | 0.044         | 0.98                    |
|                     | GLN-TYR       | -0.141        | 0.99                    | 0.024         | 0.95                    |
| Anion- $\pi$        | ASP-TRP       | -0.211        | 1                       | 0.049         | 1                       |
|                     | ASP-TYR       | -0.103        | 0.96                    | 0.012         | 0.91                    |
| Aromatic-containing | TRP-SER       | -0.294        | 1                       | 0.104         | 1                       |
|                     | PHE-CYS       | -0.232        | 1                       | 0.062         | 1                       |
|                     | TRP-ALA       | -0.206        | 1                       | 0.048         | 1                       |
|                     | TRP-PRO       | -0.205        | 1                       | 0.045         | 1                       |
|                     | TYR-SER       | -0.129        | 1                       | 0.021         | 1                       |
|                     | TRP-LEU       | -0.192        | 1                       | 0.037         | 1                       |
|                     | TRP-GLY       | -0.153        | 0.99                    | 0.033         | 0.98                    |
|                     | TRP-CYS       | -0.267        | 0.99                    | 0.076         | 0.97                    |
|                     | TYR-GLY       | -0.109        | 0.98                    | 0.021         | 0.97                    |
|                     | TRP-ILE       | -0.114        | 0.97                    | 0.024         | 0.98                    |
|                     | TRP-VAL       | -0.131        | 0.97                    | 0.018         | 0.93                    |
|                     | TRP-MET       | -0.197        | 0.95                    | 0.048         | 0.94                    |
|                     | TYR-LEU       | -0.062        | 0.95                    | 0.005         | 0.86                    |
| TYR-ALA             | -0.024        | 0.52          | 0.015                   | 1             |                         |
| His-containing      | HIS-ALA       | -0.108        | 1                       | 0.016         | 0.98                    |
|                     | HIS-PRO       | -0.124        | 0.99                    | 0.021         | 0.97                    |
|                     | HIS-LEU       | -0.110        | 0.97                    | 0.027         | 0.99                    |
| Arg-containing      | ARG-SER       | -0.152        | 1                       | 0.025         | 1                       |
|                     | ARG-ARG       | -0.184        | 0.99                    | 0.036         | 0.99                    |
|                     | ARG-PRO       | -0.128        | 0.99                    | 0.030         | 0.99                    |
|                     | ARG-LEU       | -0.084        | 0.99                    | 0.008         | 0.96                    |
|                     | ARG-CYS       | -0.230        | 0.98                    | 0.062         | 0.98                    |
|                     | ARG-GLY       | -0.096        | 0.98                    | 0.011         | 0.93                    |
|                     | ARG-GLN       | -0.166        | 1                       | 0.033         | 1                       |
| Asn/Gln-containing  | ARG-ASN       | -0.120        | 0.99                    | 0.023         | 1                       |
|                     | ASN-GLN       | -0.158        | 0.99                    | 0.032         | 0.99                    |
|                     | GLN-CYS       | -0.152        | 0.95                    | 0.051         | 1                       |
|                     | ASN-CYS       | -0.167        | 0.95                    | 0.044         | 0.94                    |
|                     | GLN-ALA       | -0.085        | 0.95                    | 0.010         | 0.88                    |
|                     | ASN-SER       | -0.087        | 0.95                    | 0.009         | 0.8                     |
|                     | GLN-GLY       | -0.081        | 0.95                    | 0.010         | 0.8                     |
|                     | GLN-LEU       | -0.065        | 0.94                    | 0.010         | 0.98                    |
| ASN-LEU             | -0.009        | 0.17          | 0.010                   | 0.97          |                         |
| Miscellaneous       | LEU-CYS       | -0.195        | 1                       | 0.050         | 1                       |
|                     | LEU-SER       | -0.074        | 0.97                    | 0.010         | 0.97                    |
|                     | SER-SER       | -0.109        | 0.96                    | 0.019         | 0.95                    |
|                     | PRO-SER       | -0.080        | 0.96                    | 0.009         | 0.91                    |
|                     | CYS-PRO       | -0.134        | 0.95                    | 0.029         | 0.9                     |
|                     | ASP-LEU       | -0.033        | 0.77                    | 0.010         | 0.97                    |
| SER-GLY             | -0.004        | 0.11          | 0.010                   | 0.97          |                         |

**Table S3. Solubilizing residue-residue interactions**, defined by  $\mathcal{M} > 0$  and the relaxed significance criteria requiring the  $|\mathcal{M}|$  or  $\mathcal{V}$  values to be higher than 95% of the equivalent quantities computed from randomly shuffled datasets ( $\text{Sig}\mathcal{M} \geq 0.95$  or  $\text{Sig}\mathcal{V} \geq 0.95$ ).

| Interactions         | Residue pairs      | $\mathcal{M}$ | $\text{Sig}\mathcal{M}$ | $\mathcal{V}$ | $\text{Sig}\mathcal{V}$ |
|----------------------|--------------------|---------------|-------------------------|---------------|-------------------------|
| Lys-salt bridges     | GLU-LYS            | 0.115         | 1                       | 0.017         | 1                       |
|                      | LYS-ASP            | 0.105         | 0.97                    | 0.013         | 0.96                    |
| Aliphatic-aliphatic  | VAL-VAL            | 0.156         | 1                       | 0.025         | 1                       |
|                      | ILE-ILE            | 0.125         | 1                       | 0.018         | 1                       |
|                      | VAL-ILE            | 0.096         | 1                       | 0.010         | 1                       |
|                      | GLY-VAL            | 0.114         | 1                       | 0.015         | 1                       |
|                      | ILE-ALA            | 0.072         | 1                       | 0.006         | 0.97                    |
|                      | LEU-ILE            | 0.064         | 0.99                    | 0.007         | 1                       |
|                      | LEU-VAL            | 0.058         | 0.99                    | 0.004         | 0.96                    |
|                      | GLY-GLY            | 0.113         | 0.98                    | 0.014         | 0.96                    |
|                      | ALA-VAL            | 0.060         | 0.97                    | 0.004         | 0.94                    |
|                      | GLY-ALA            | 0.063         | 0.96                    | 0.005         | 0.93                    |
| Aliphatic-containing | ILE-LYS            | 0.134         | 1                       | 0.026         | 1                       |
|                      | VAL-GLU            | 0.120         | 1                       | 0.017         | 1                       |
|                      | VAL-THR            | 0.086         | 1                       | 0.010         | 0.99                    |
|                      | GLY-ASP            | 0.114         | 1                       | 0.017         | 0.99                    |
|                      | ILE-THR            | 0.080         | 1                       | 0.008         | 0.97                    |
|                      | GLY-THR            | 0.093         | 0.99                    | 0.015         | 0.99                    |
|                      | GLY-GLU            | 0.105         | 0.99                    | 0.012         | 0.96                    |
|                      | ILE-GLU            | 0.089         | 0.99                    | 0.011         | 0.95                    |
|                      | ALA-LYS            | 0.095         | 0.98                    | 0.013         | 0.97                    |
|                      | VAL-PRO            | 0.068         | 0.95                    | 0.008         | 0.98                    |
|                      | VAL-LYS            | 0.097         | 0.95                    | 0.014         | 0.98                    |
|                      | GLY-LYS            | 0.088         | 0.95                    | 0.012         | 0.91                    |
|                      | Asp/Glu containing | GLU-THR       | 0.153                   | 1             | 0.032                   |
| GLU-ASP              |                    | 0.112         | 1                       | 0.015         | 0.9                     |
| ASP-MET              |                    | 0.124         | 0.93                    | 0.039         | 1                       |

Figure S1. Distribution of solubility values  $S$  (in %) of the proteins from the  $\mathcal{D}^{\text{tot}}$  dataset. The vertical line at  $S = 64\%$  separates this set into the subset  $\mathcal{D}^{\text{sol}}$  of soluble proteins (right) and the set  $\mathcal{D}^{\text{insol}}$  of aggregation-prone proteins (left).

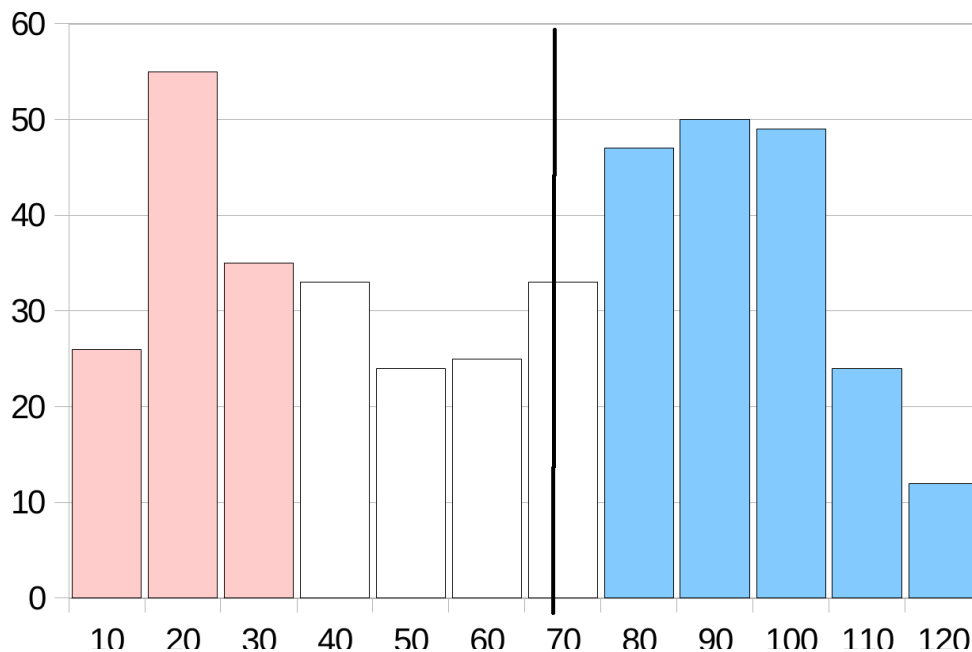

Figure S2. Ratio of the frequency of each amino acid in the set  $\mathcal{D}^{\text{insol}}$  over the frequency in the set  $\mathcal{D}^{\text{sol}}$ , minus 1.

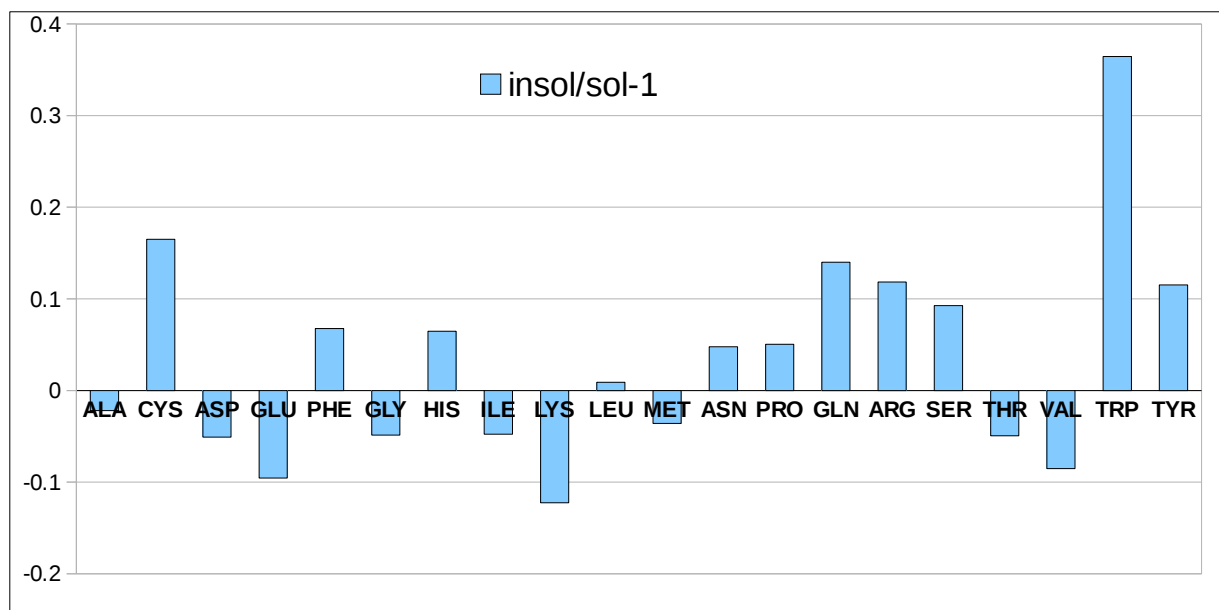

**Figure S3. Statistical distance potentials derived from soluble or aggregation-prone protein sets.** The energies are in kcal/mol, the distance  $d$  (in Å) is computed between residue side chain centroids, and the residues are separated by at least 8 residues along the chain. Distance bins containing ten occurrences or less are not drawn.

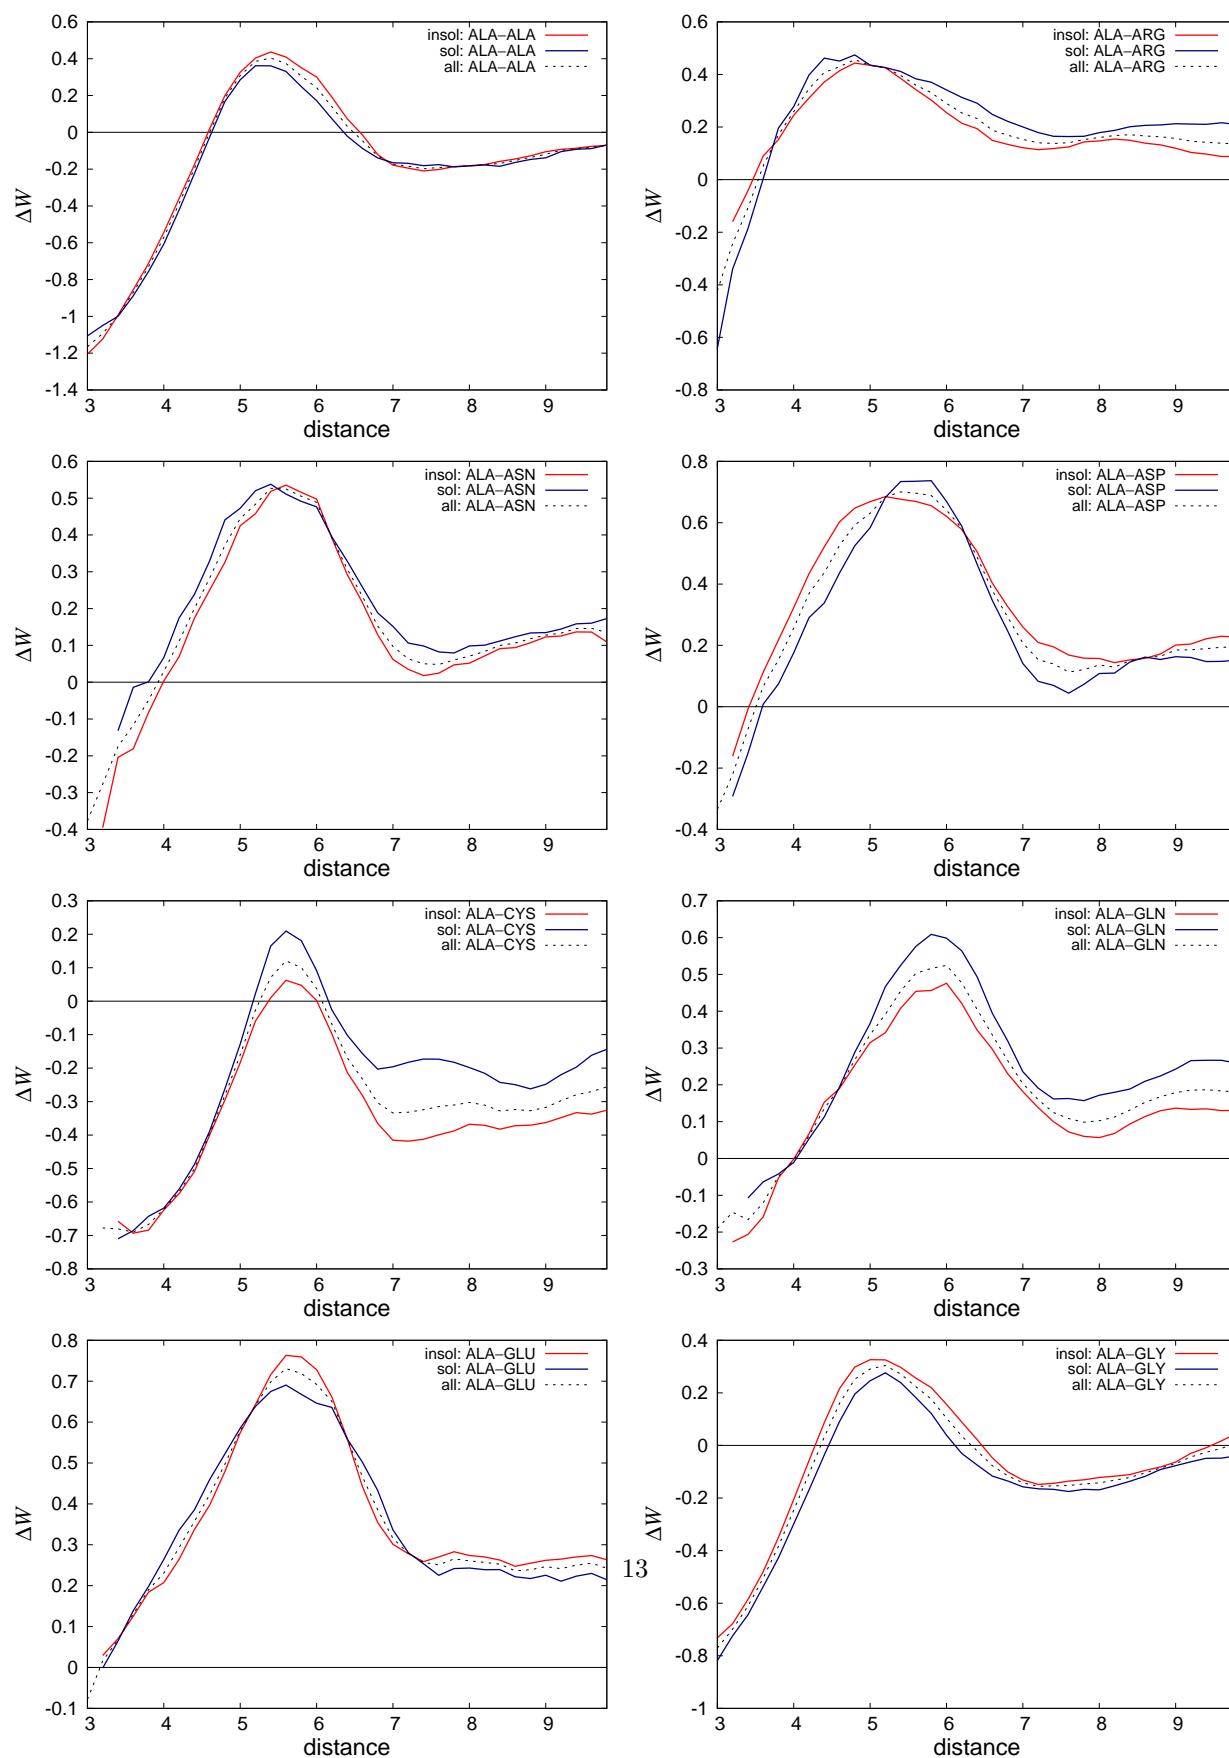

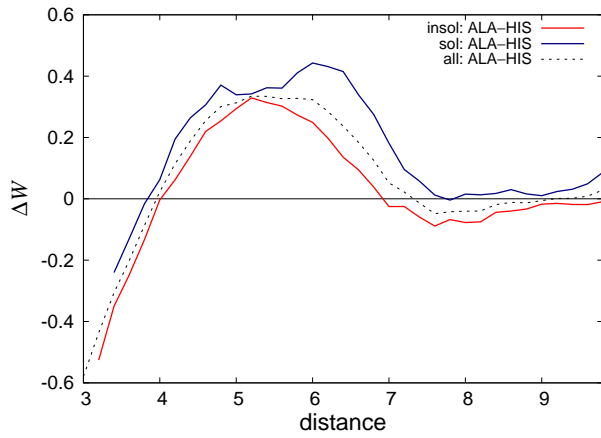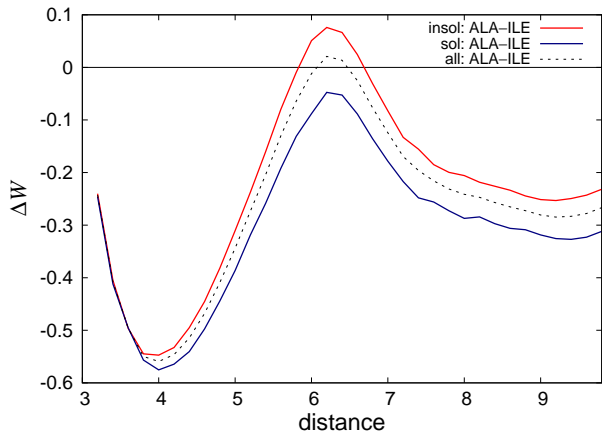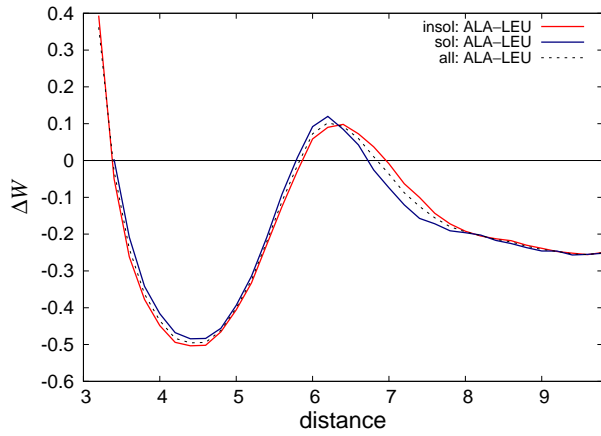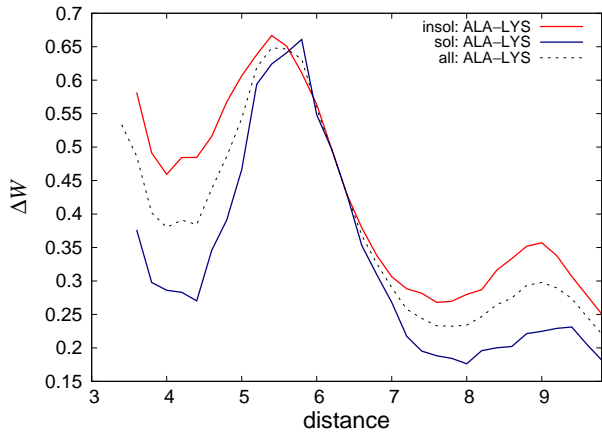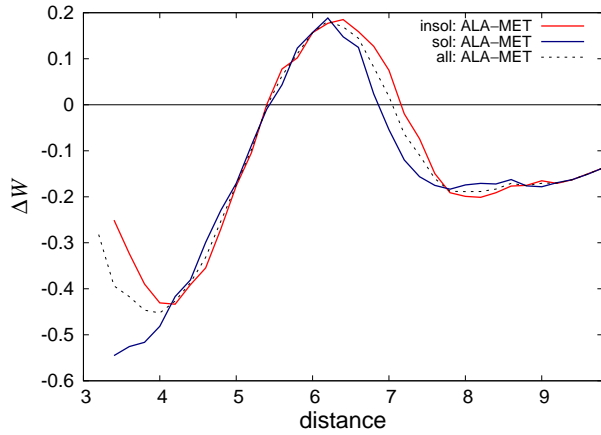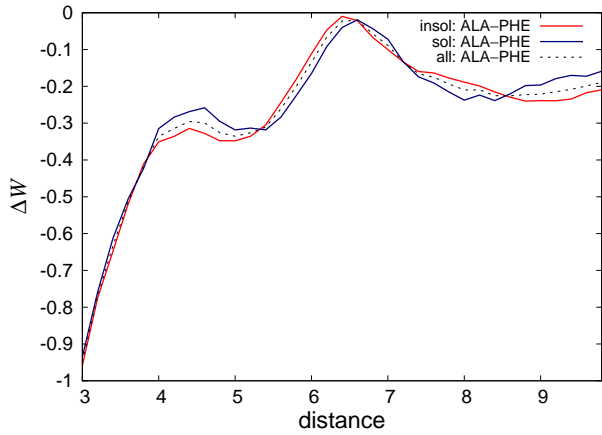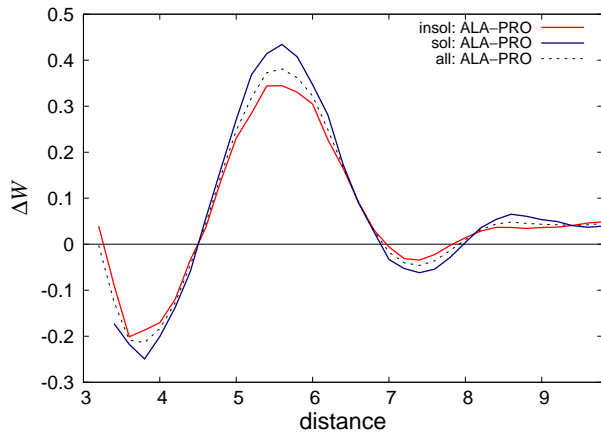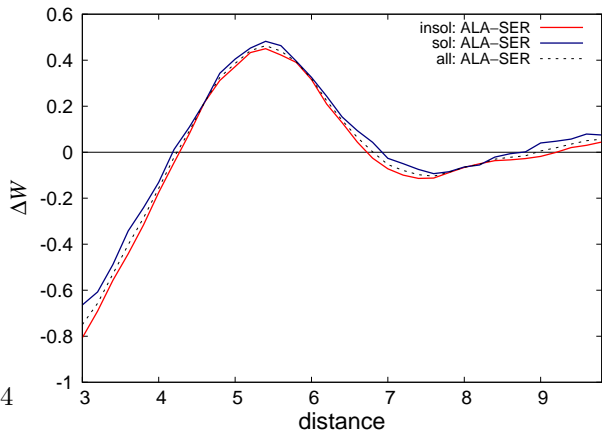

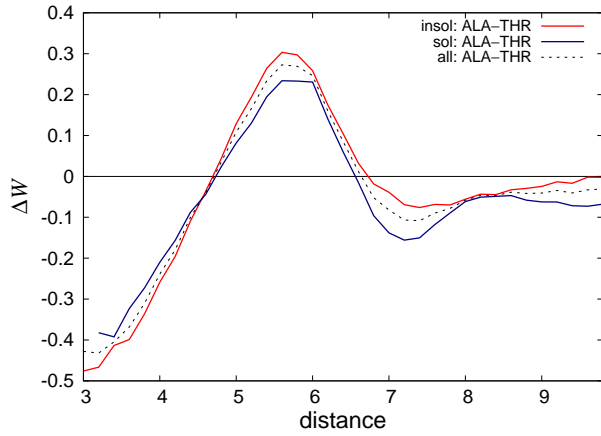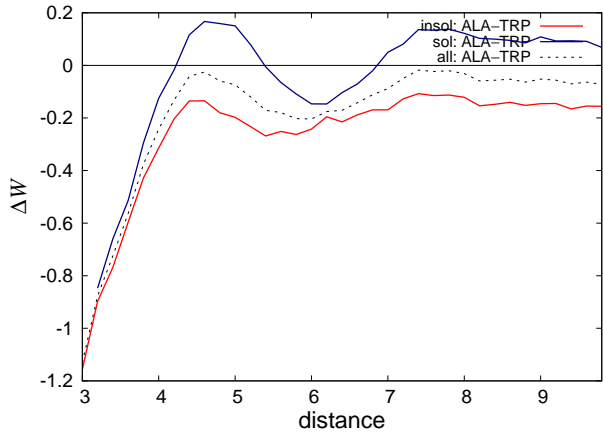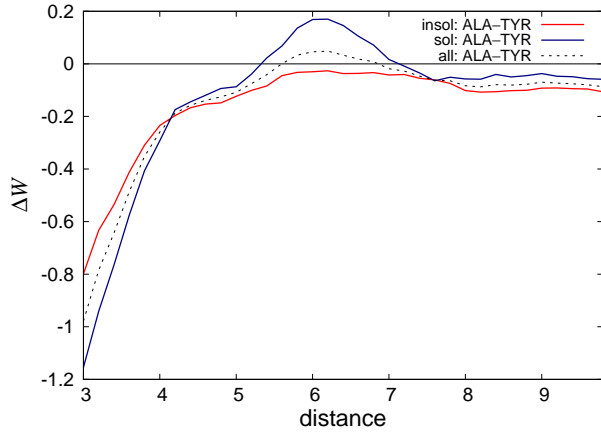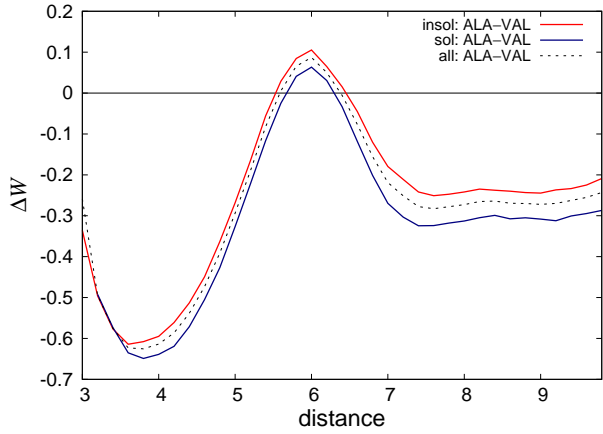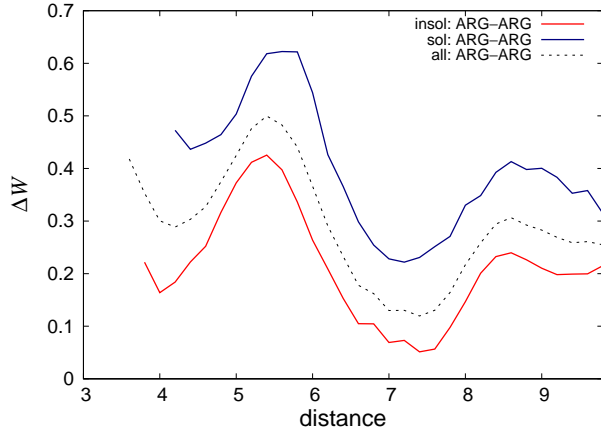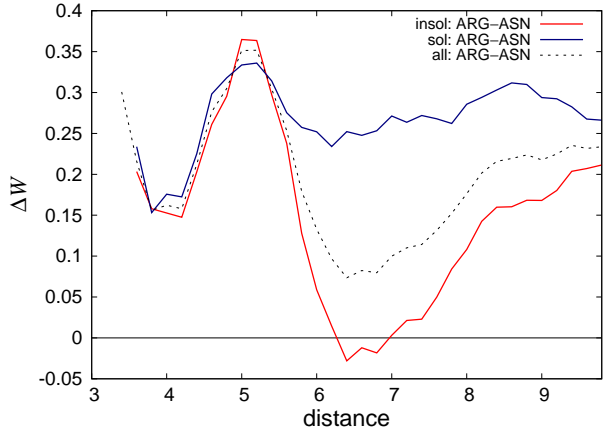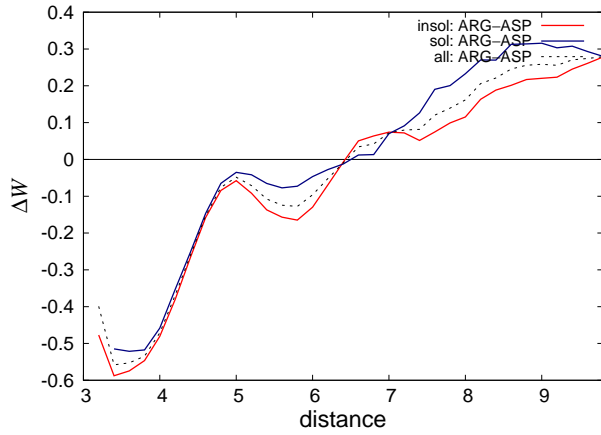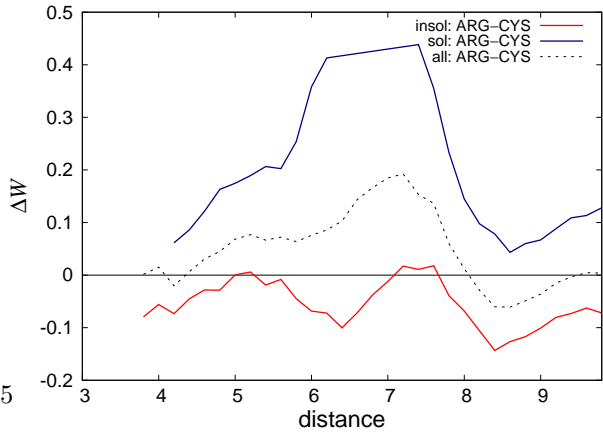

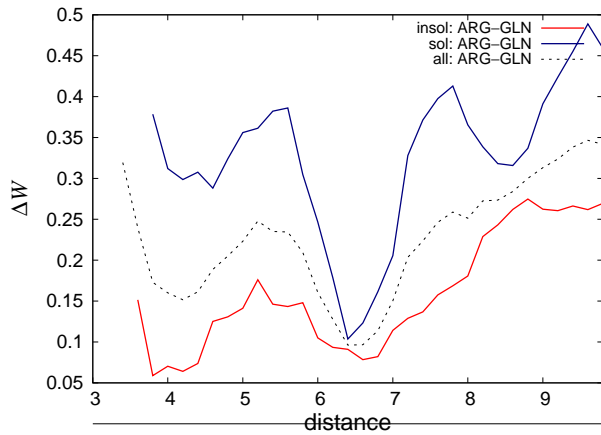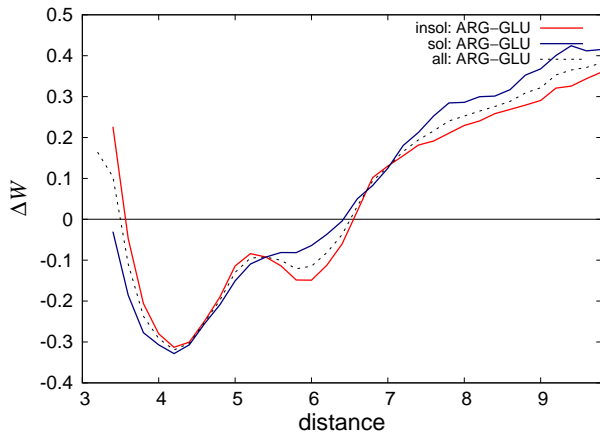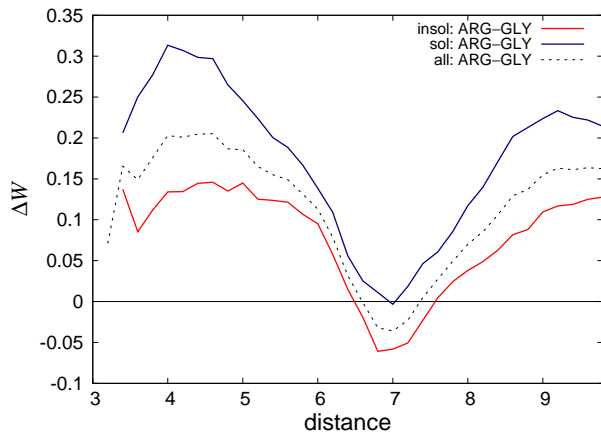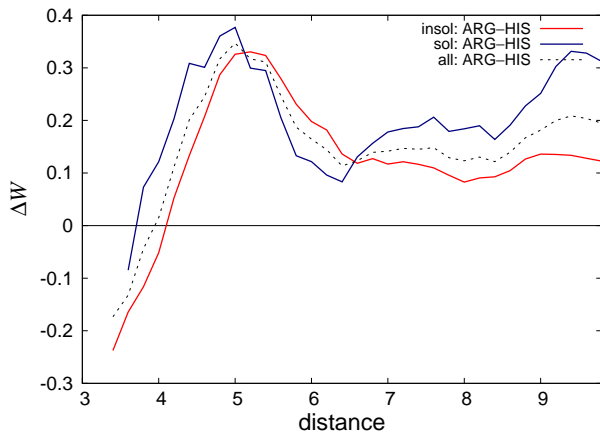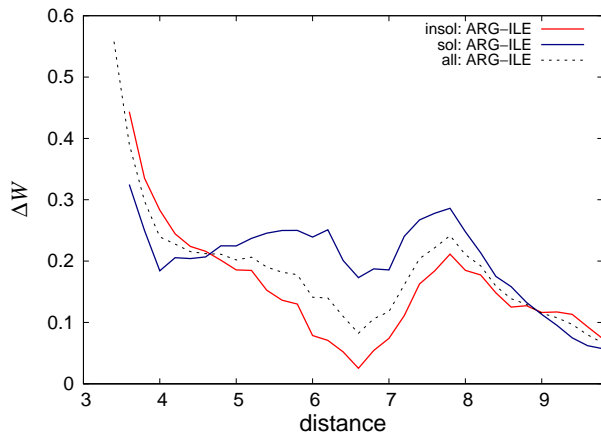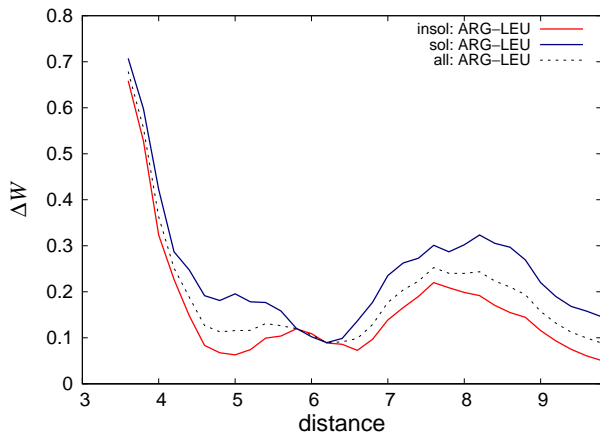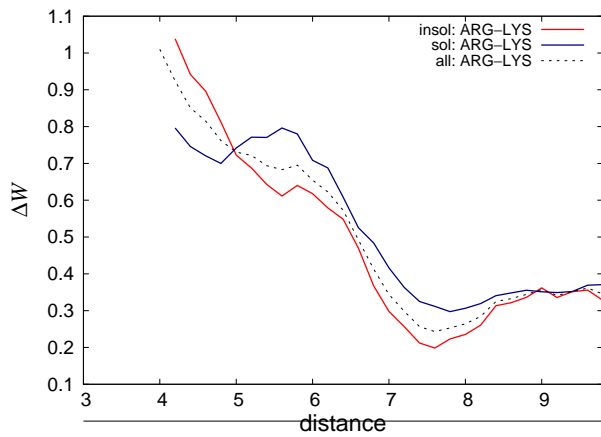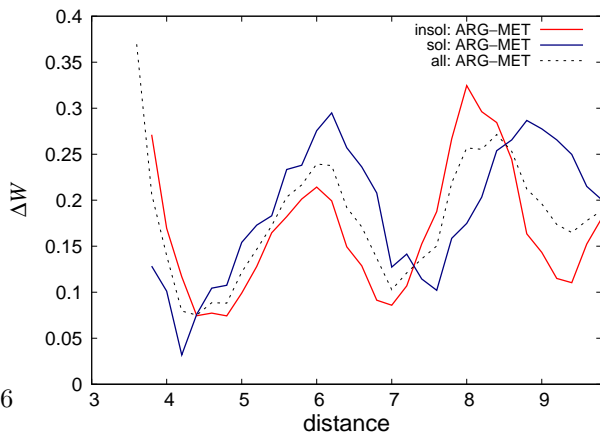



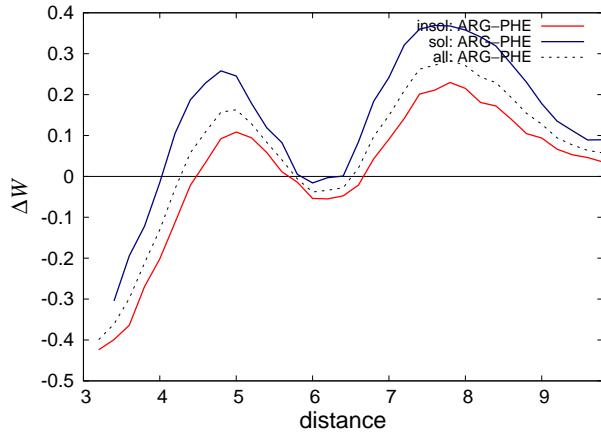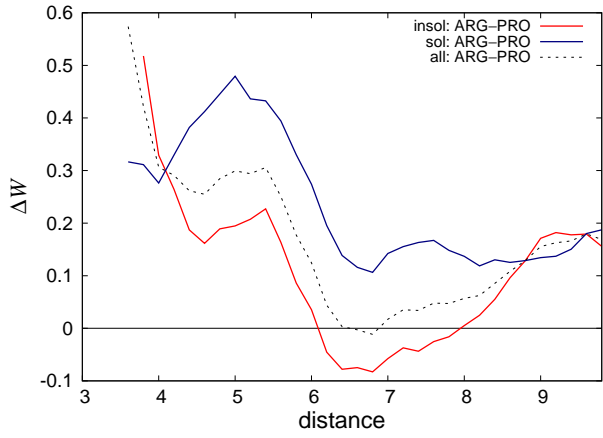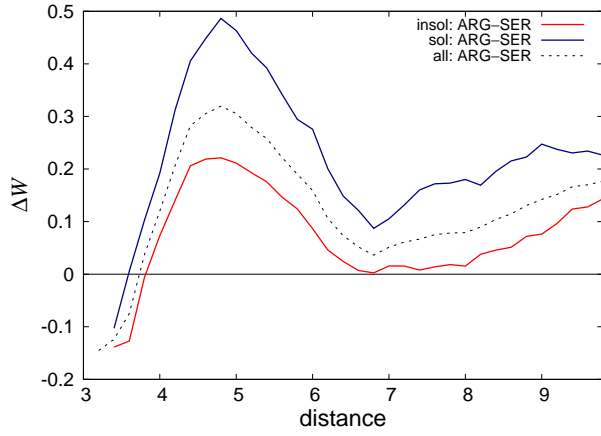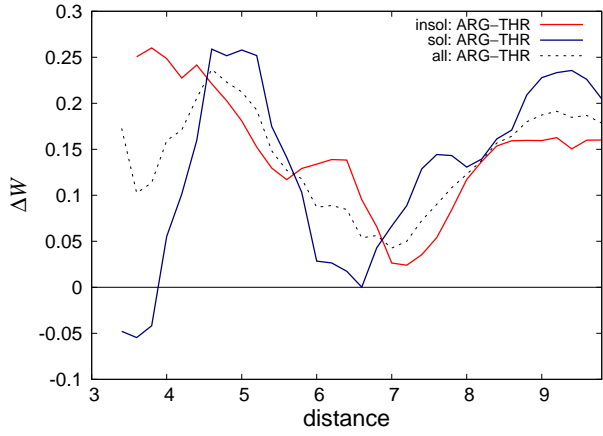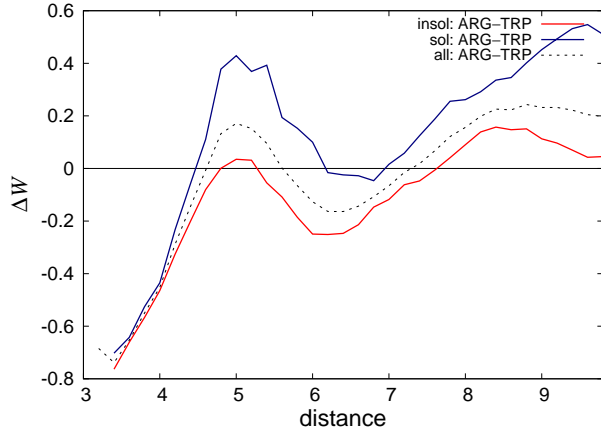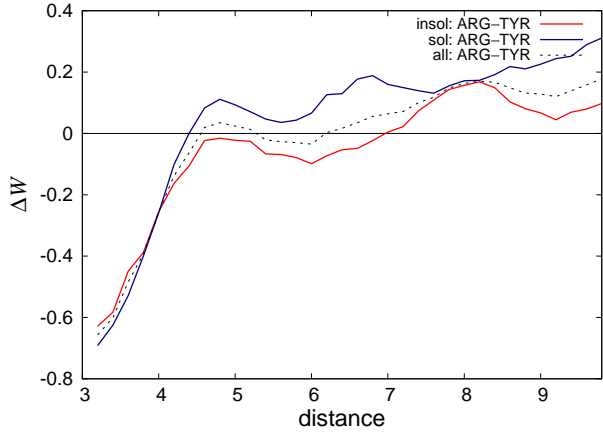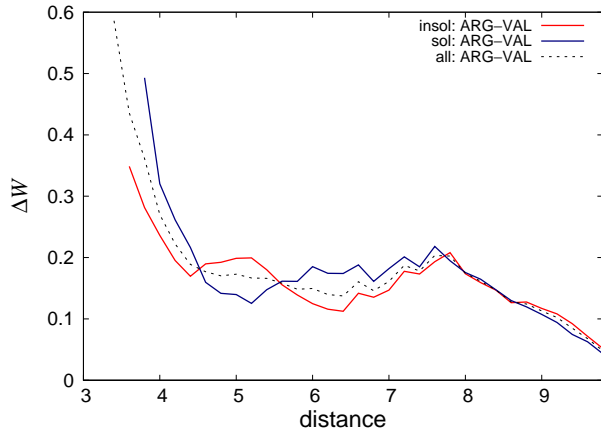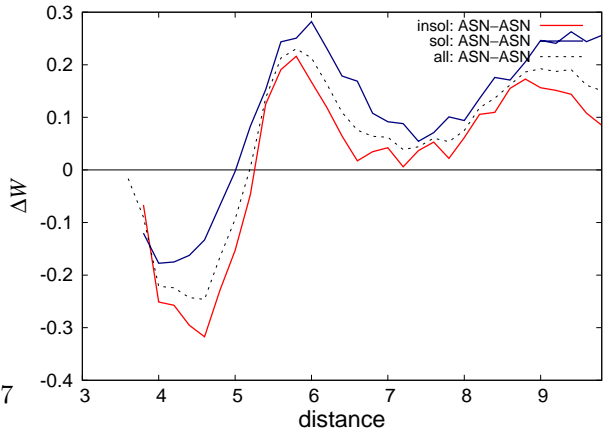

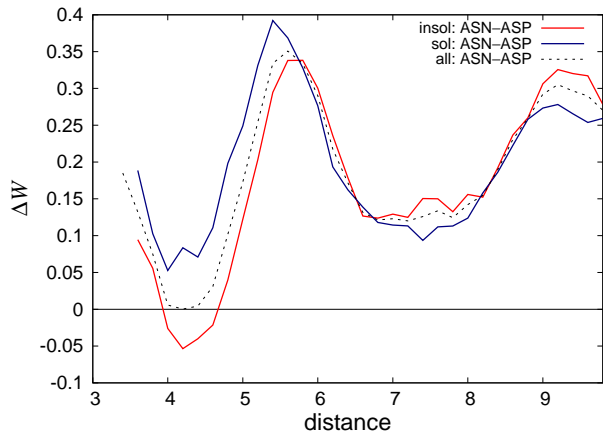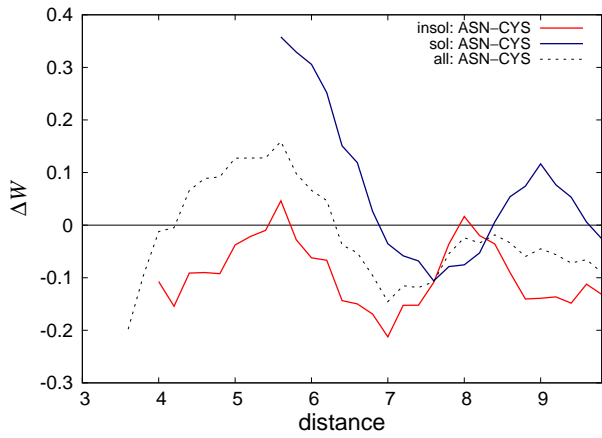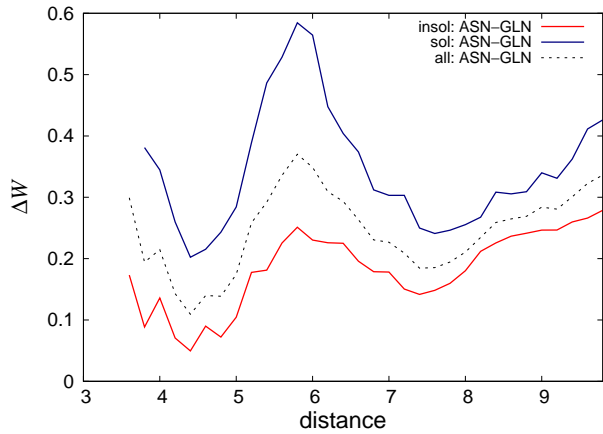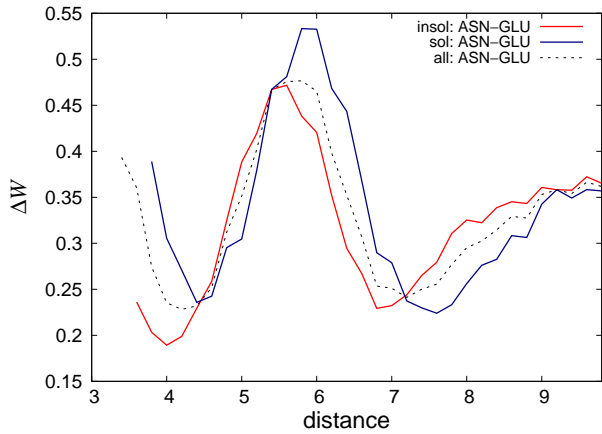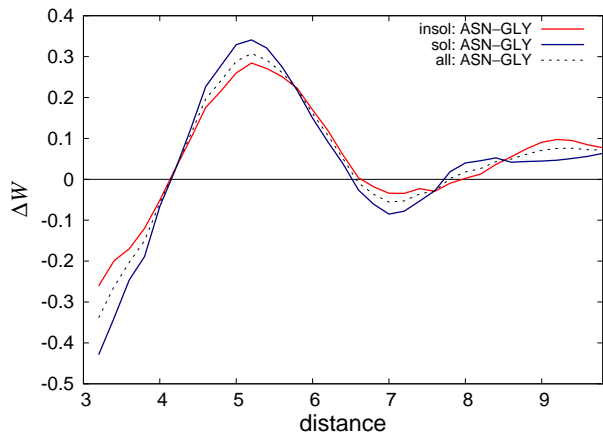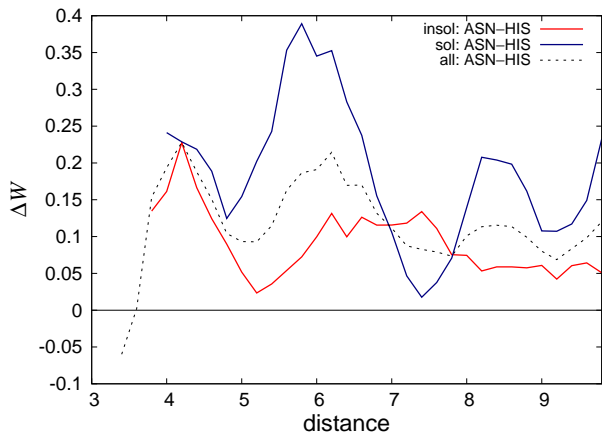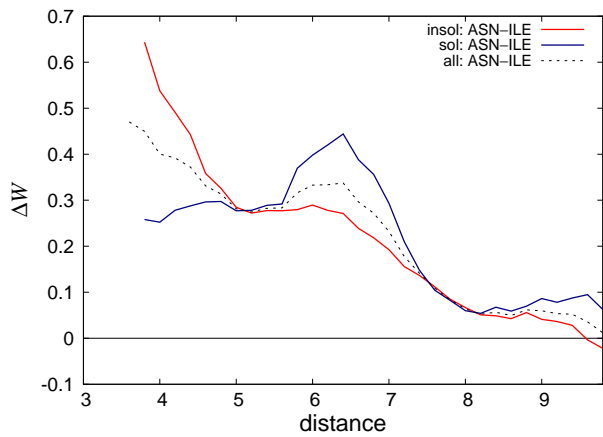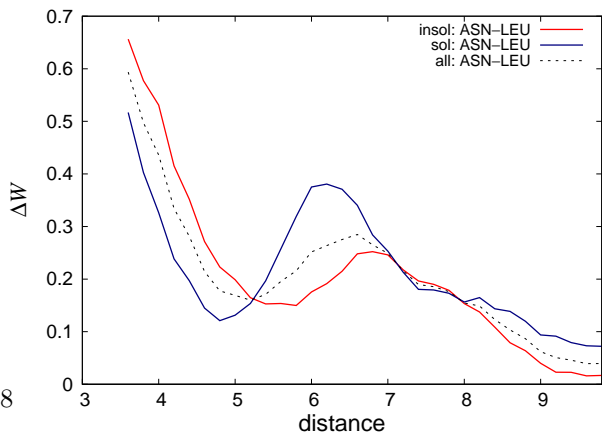

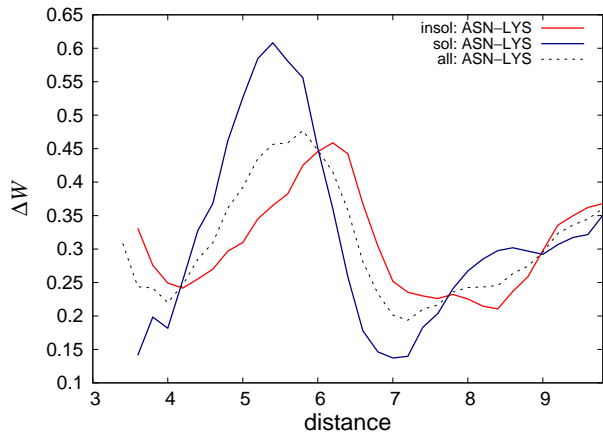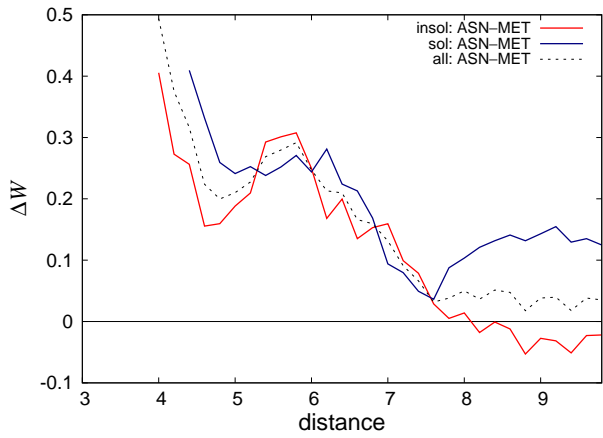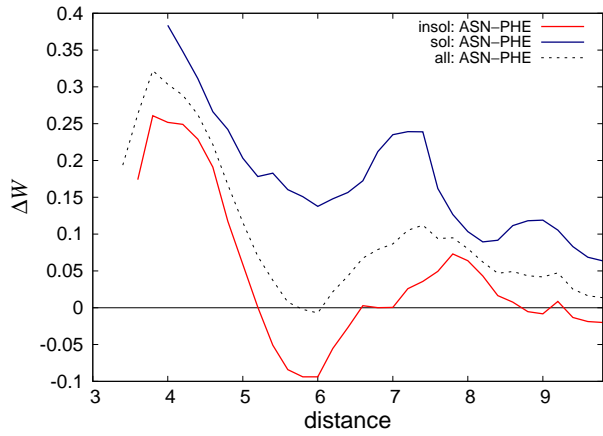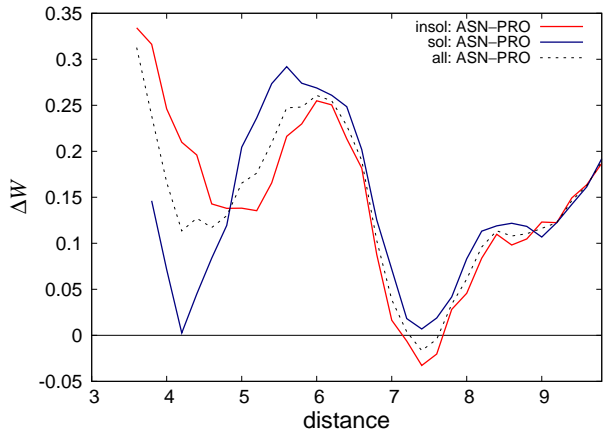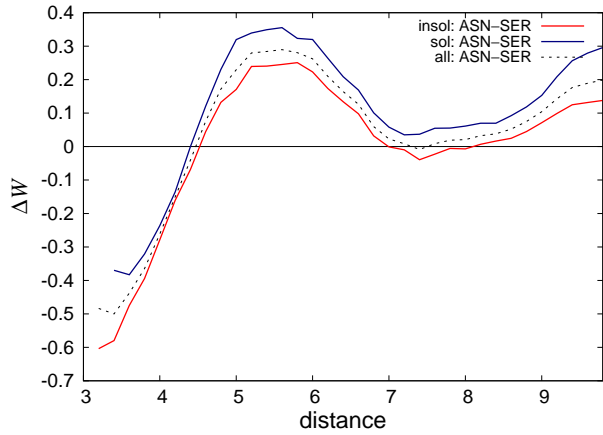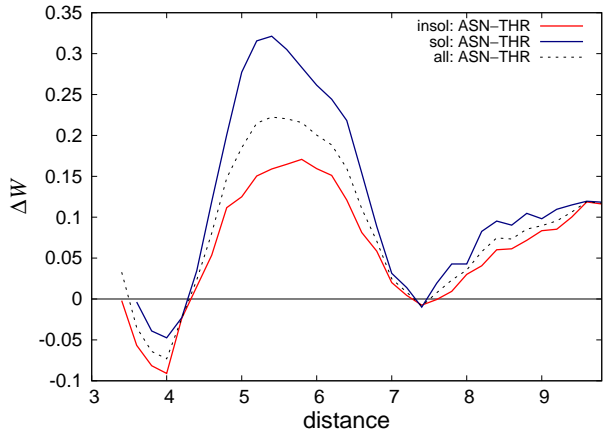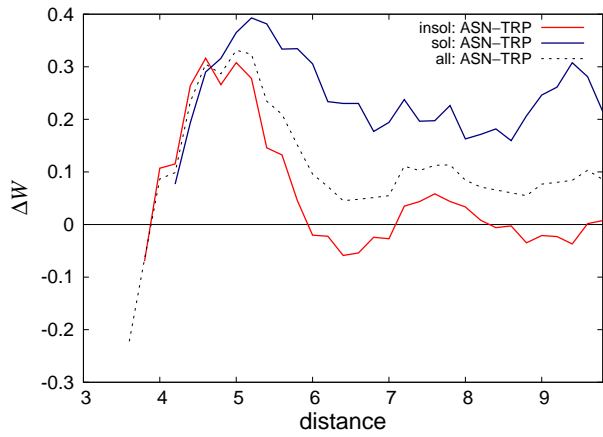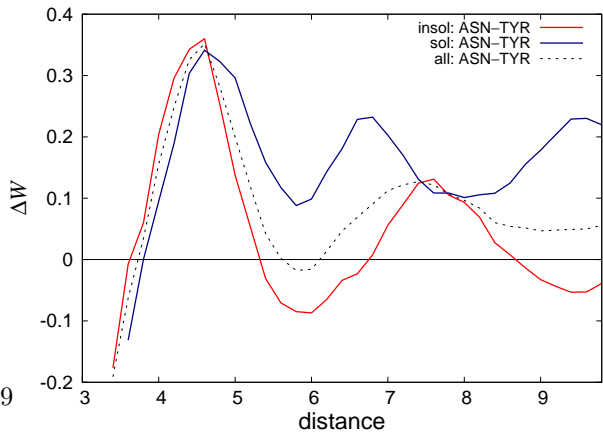

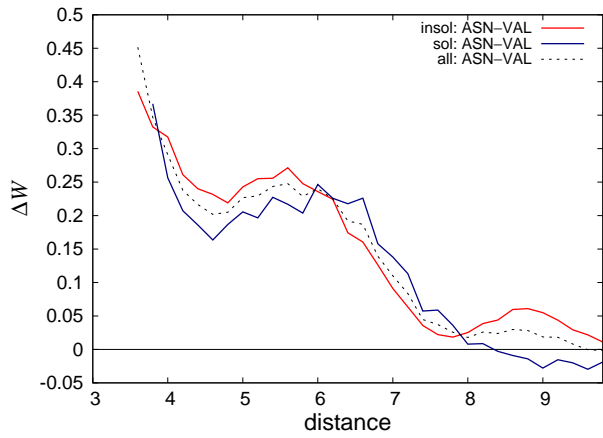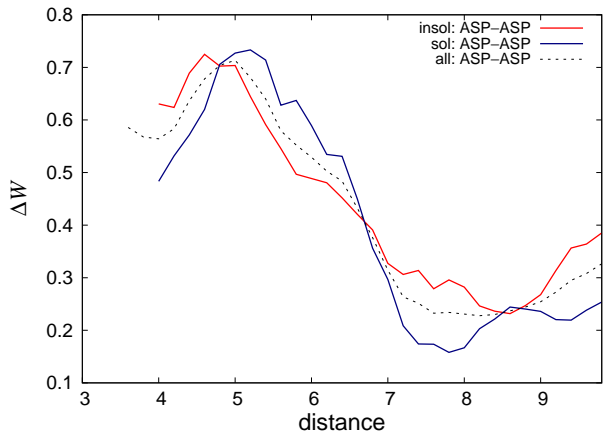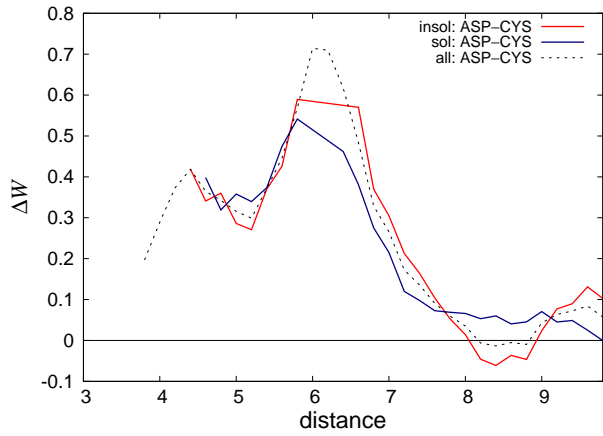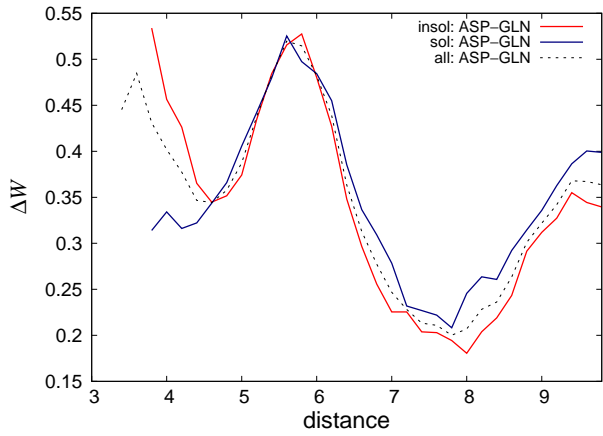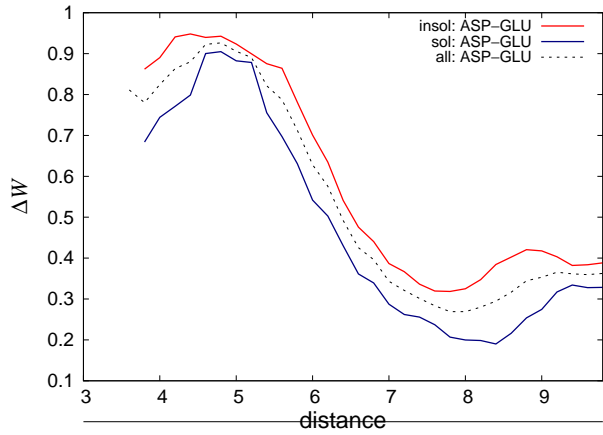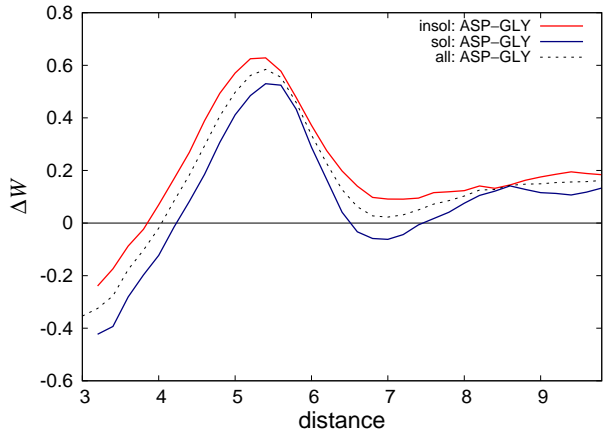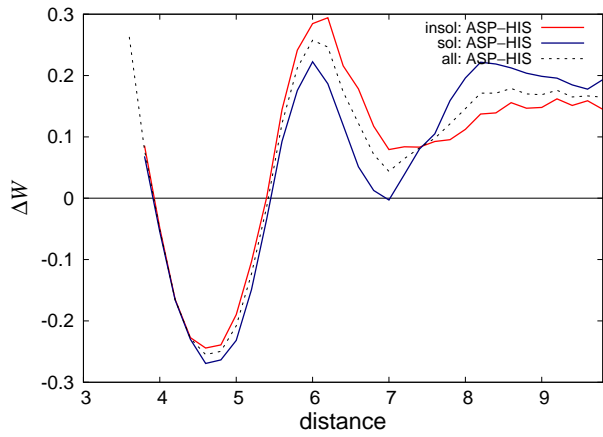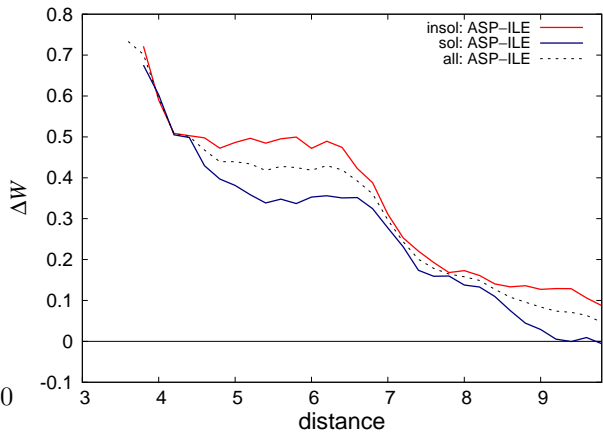

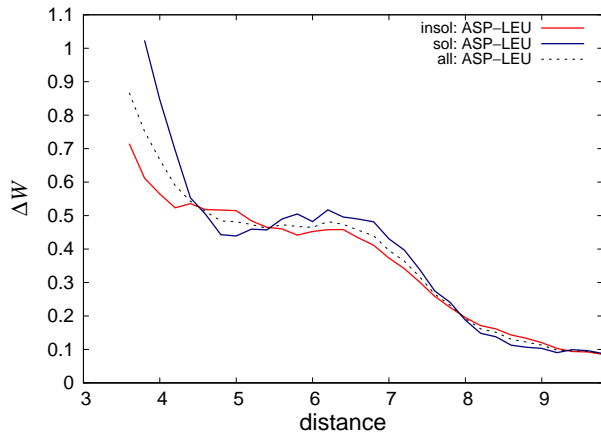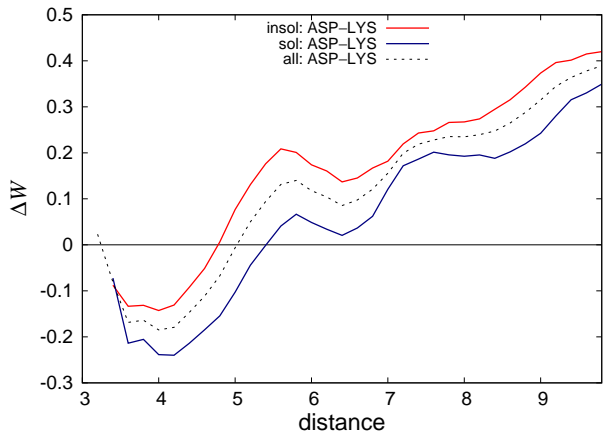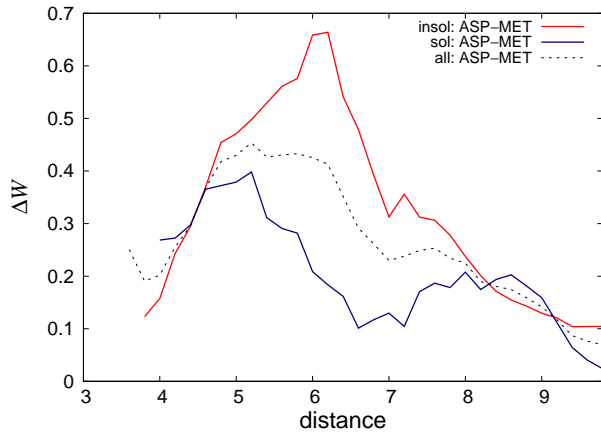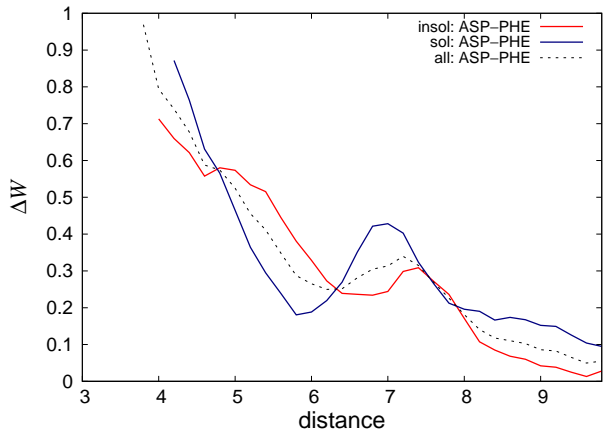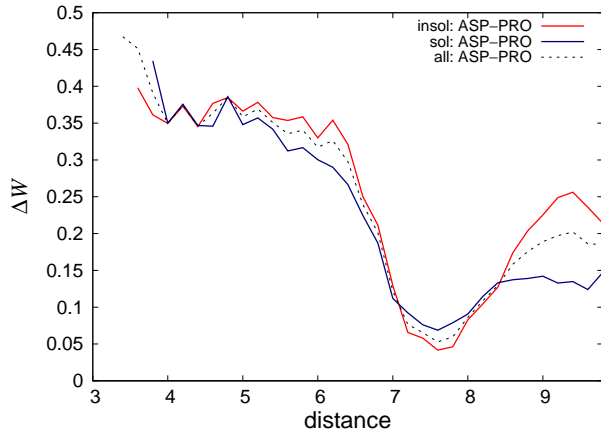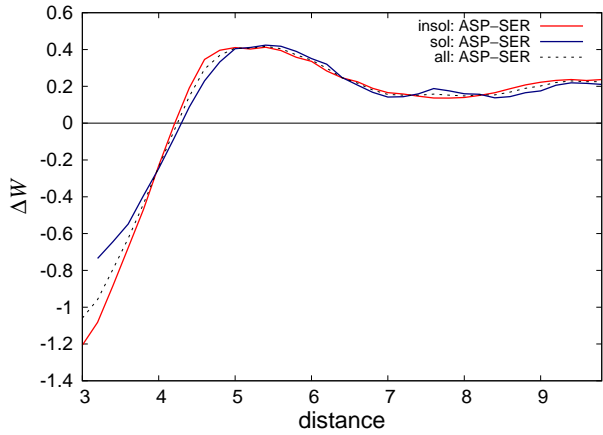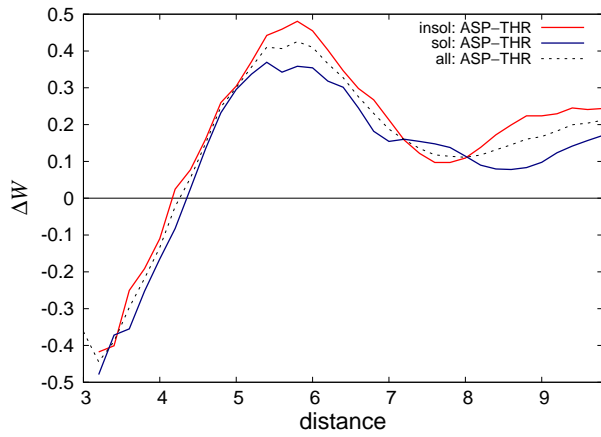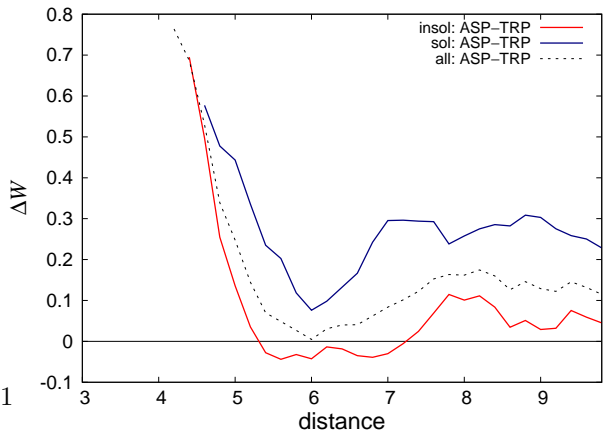

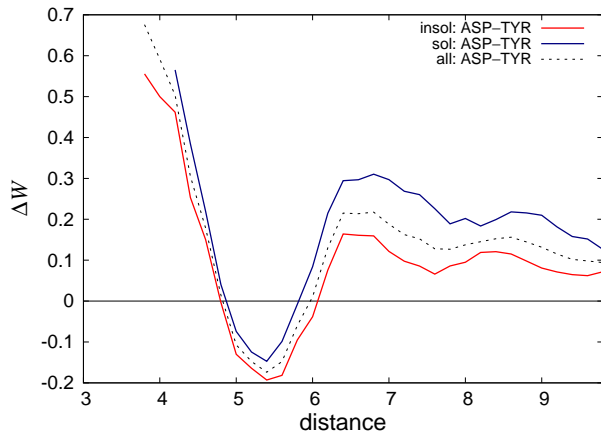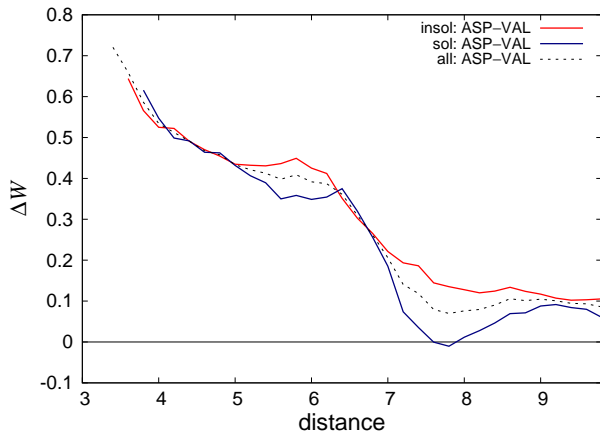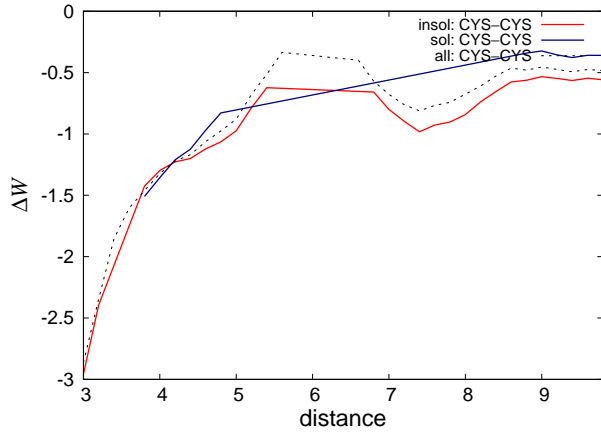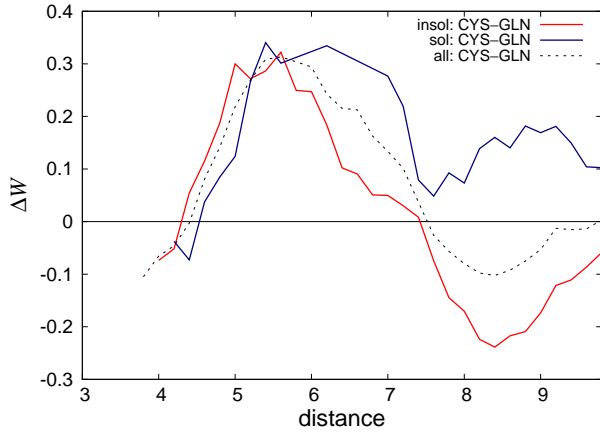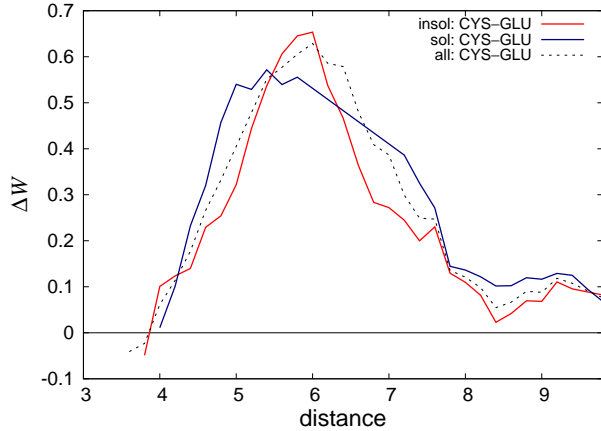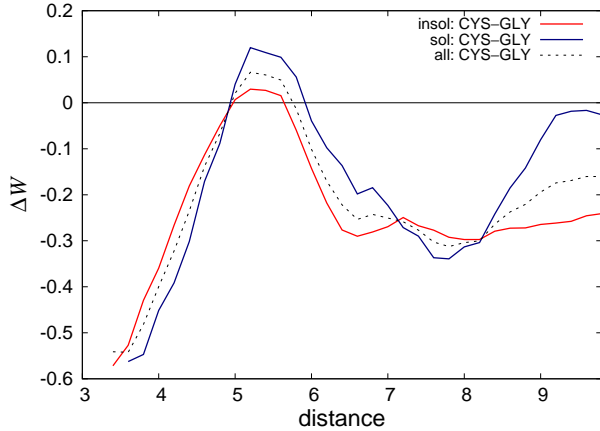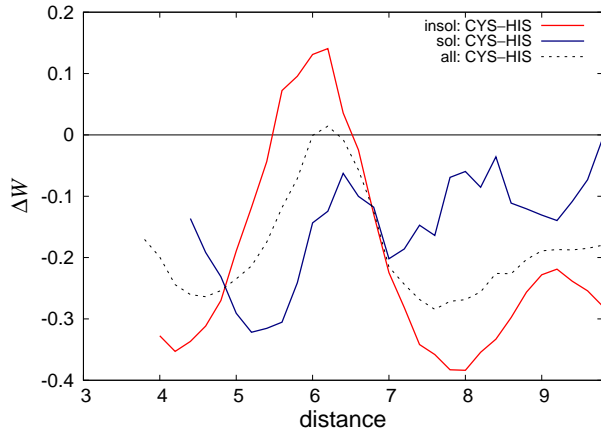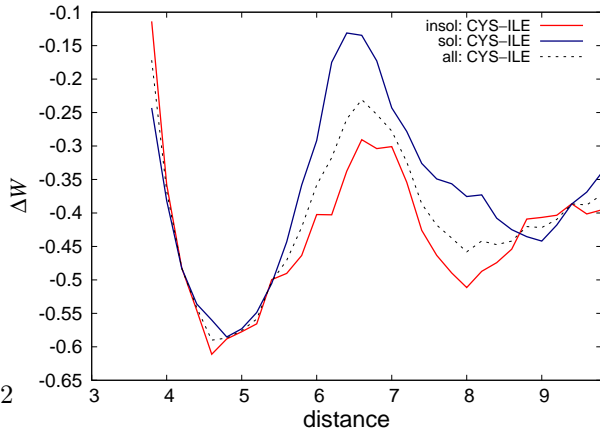

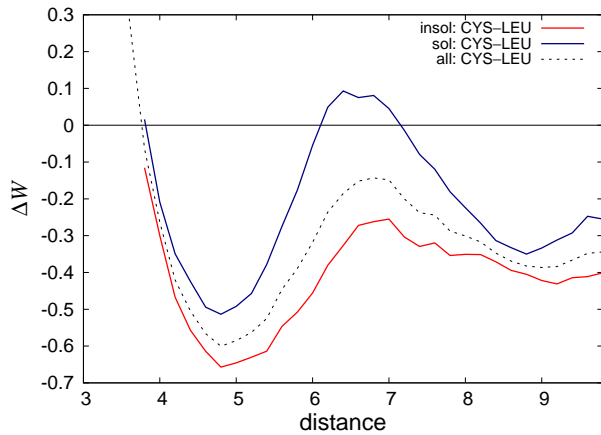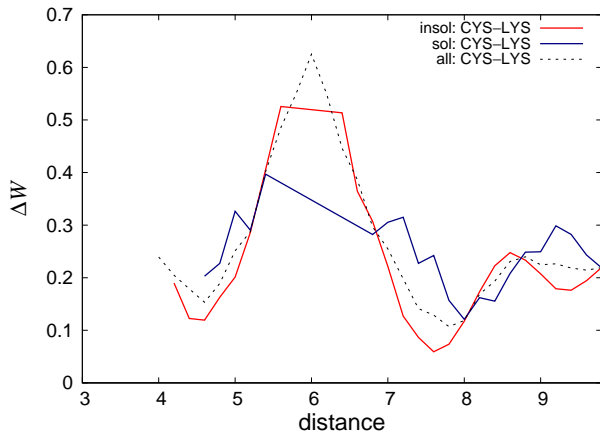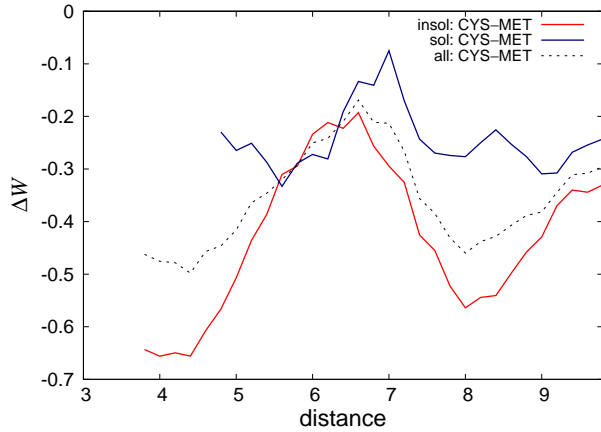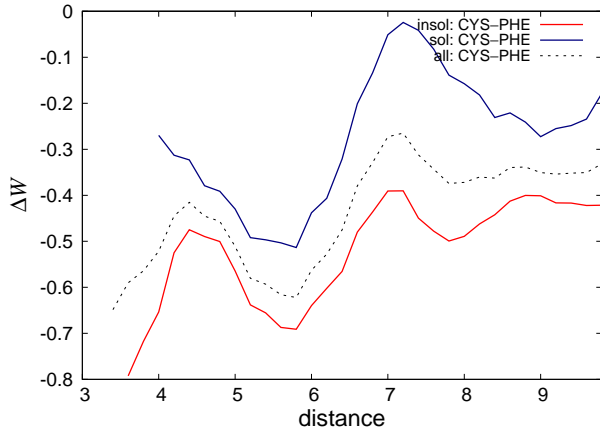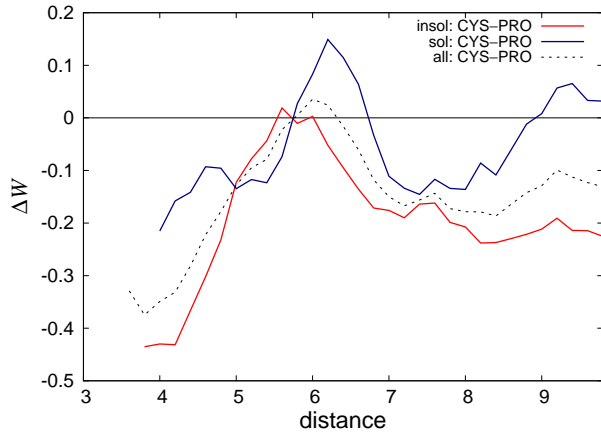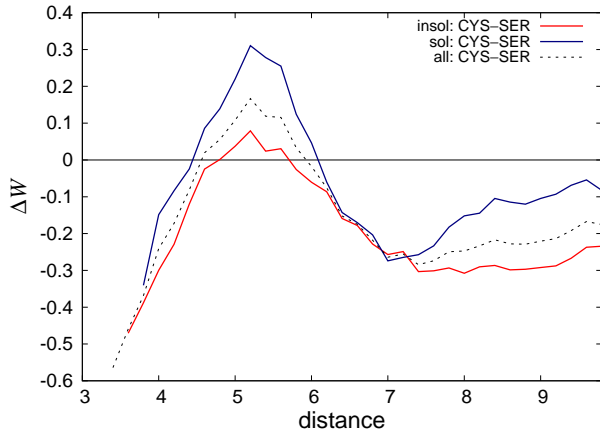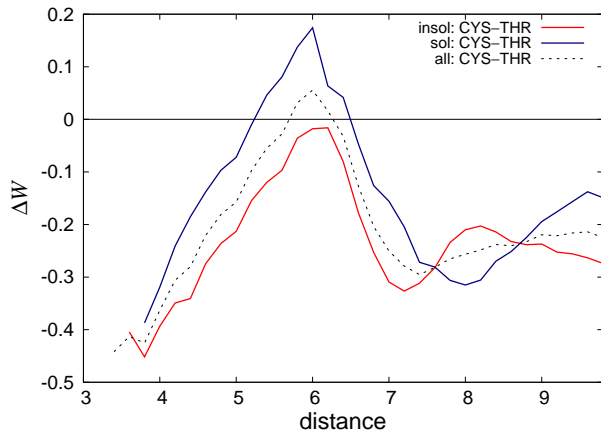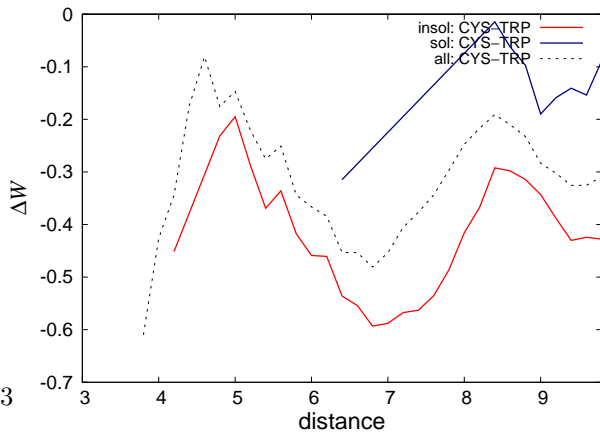

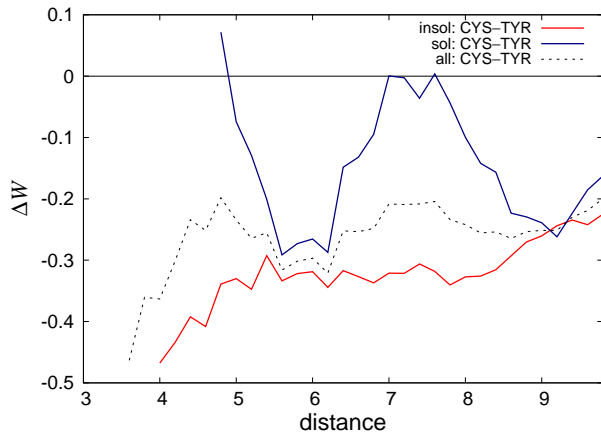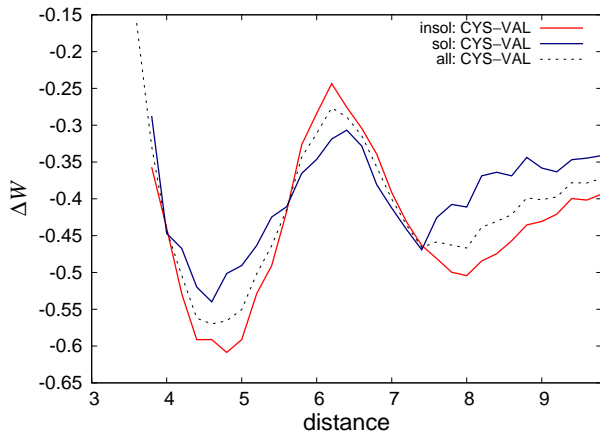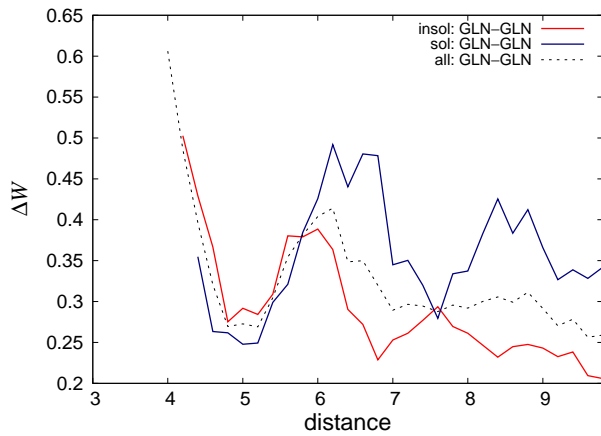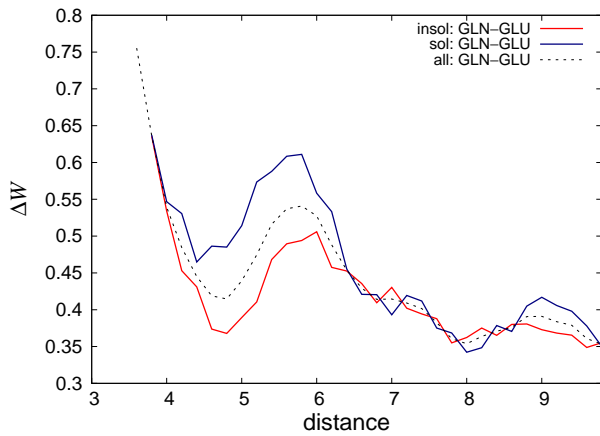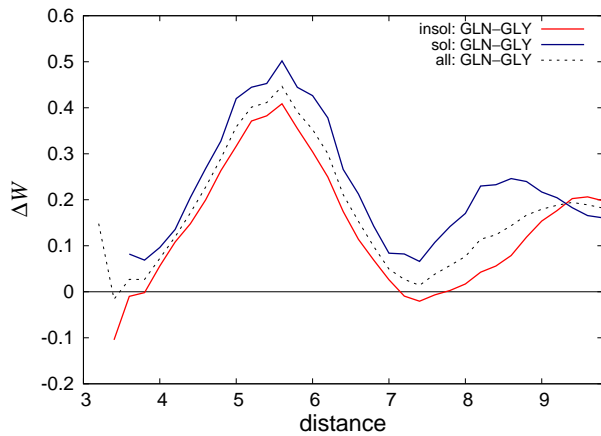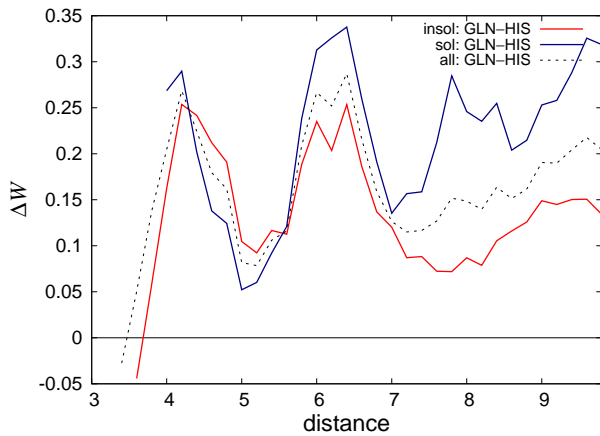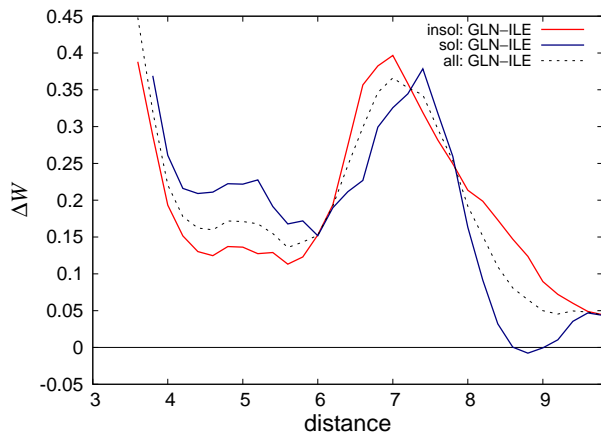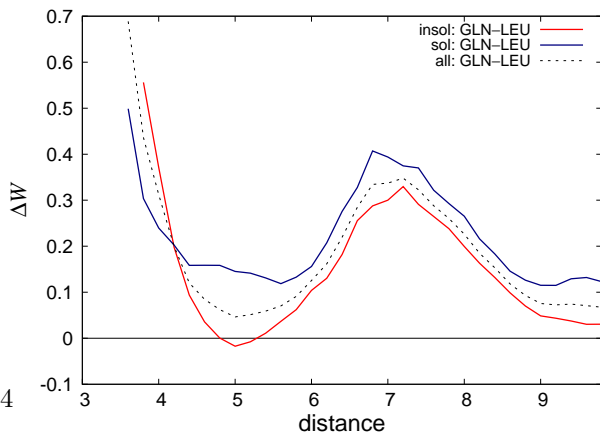



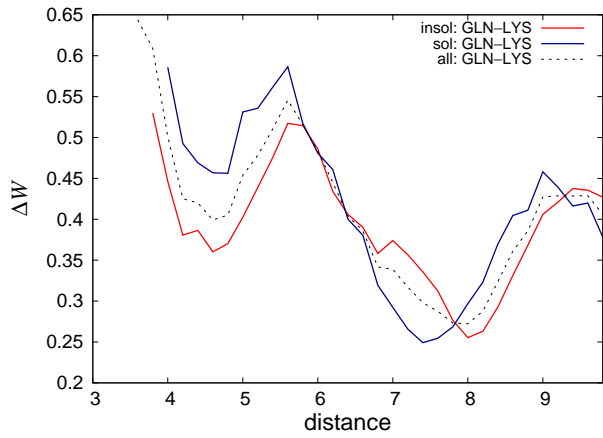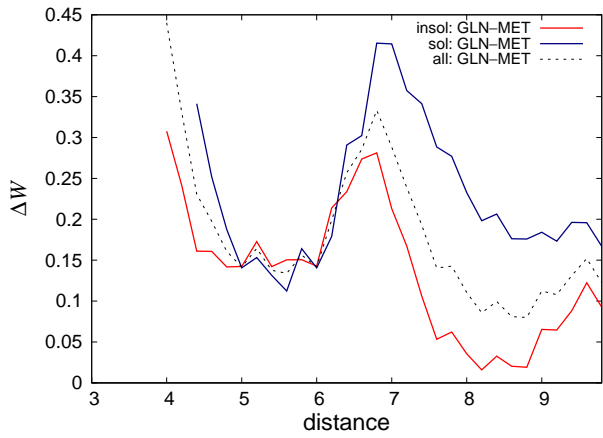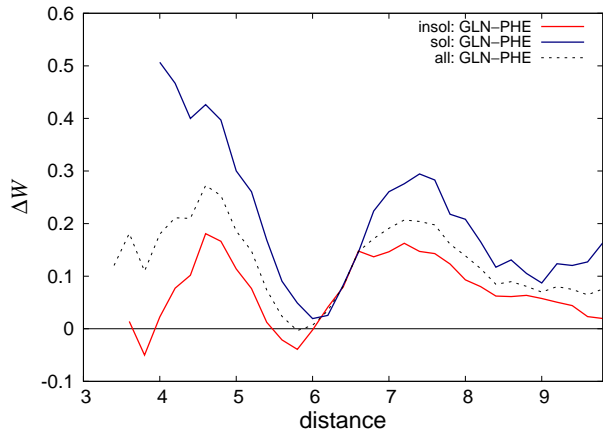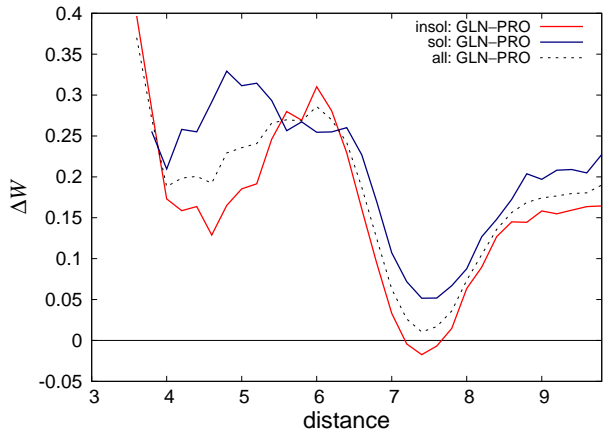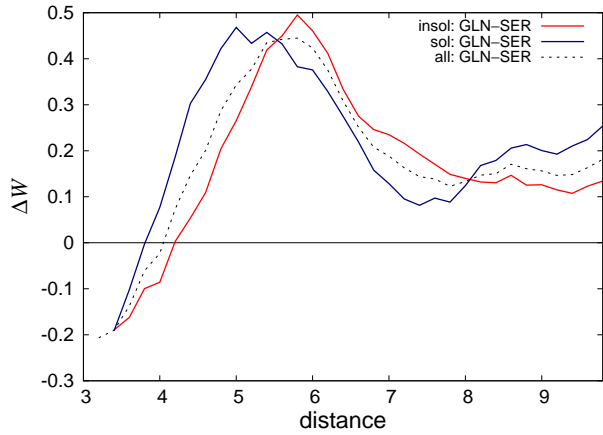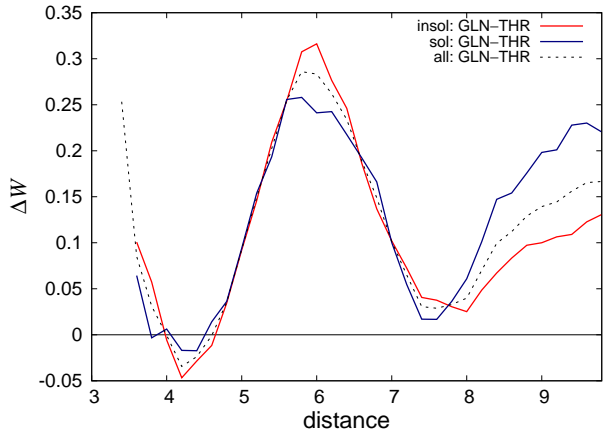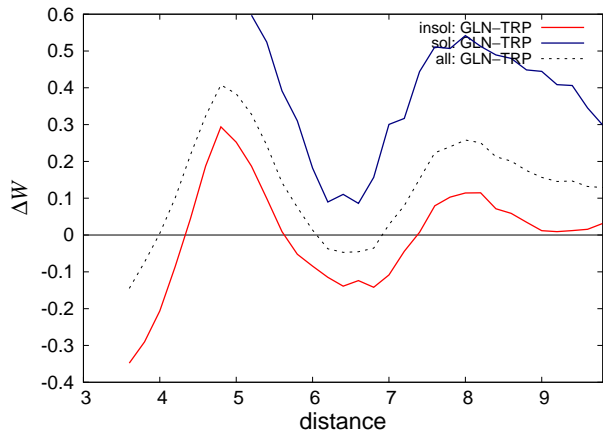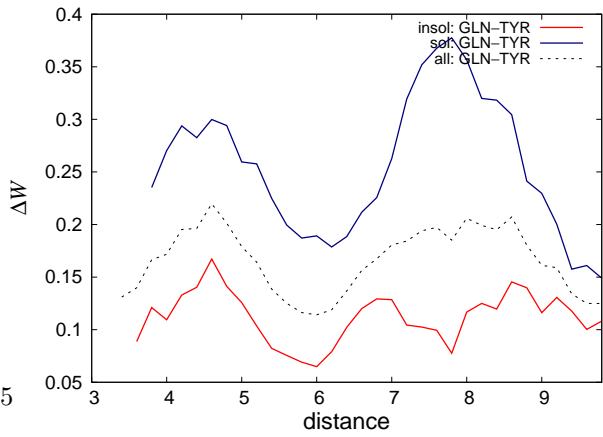

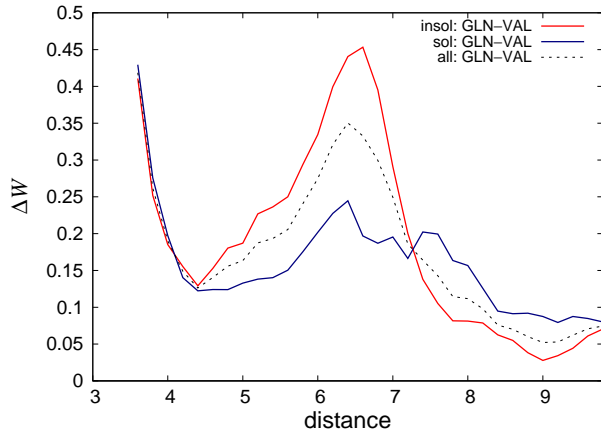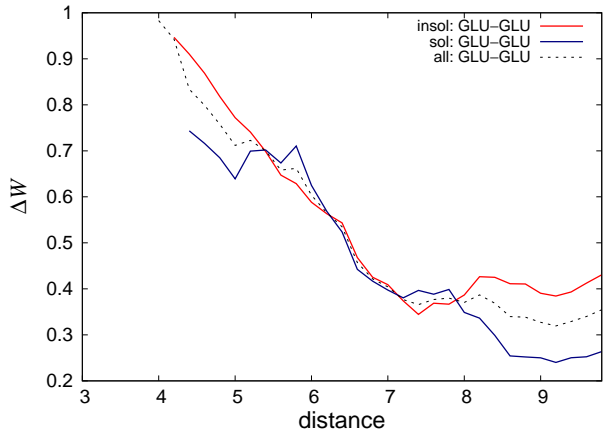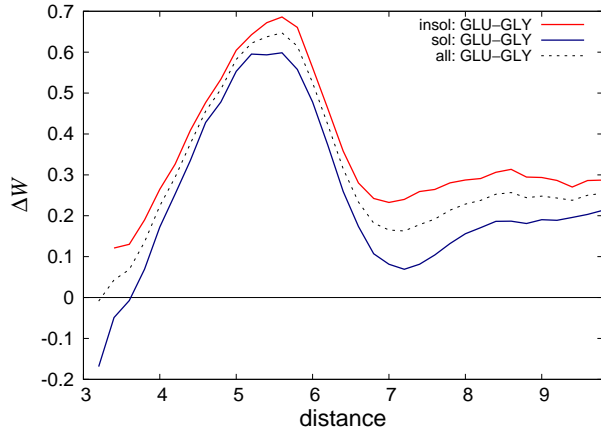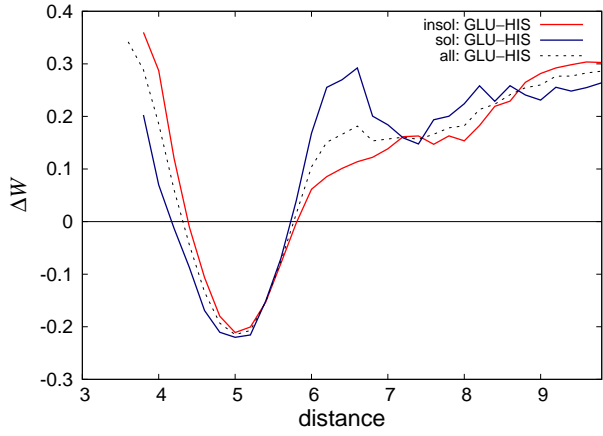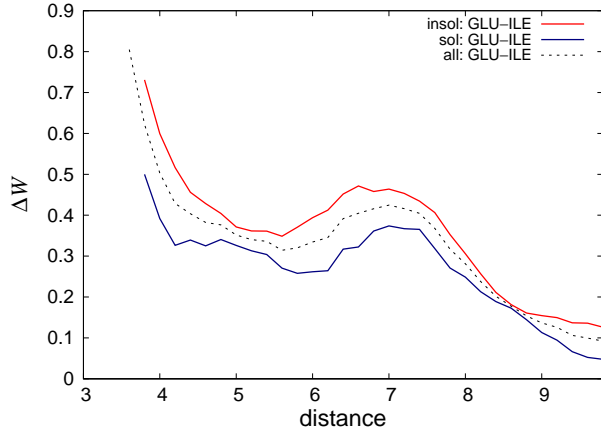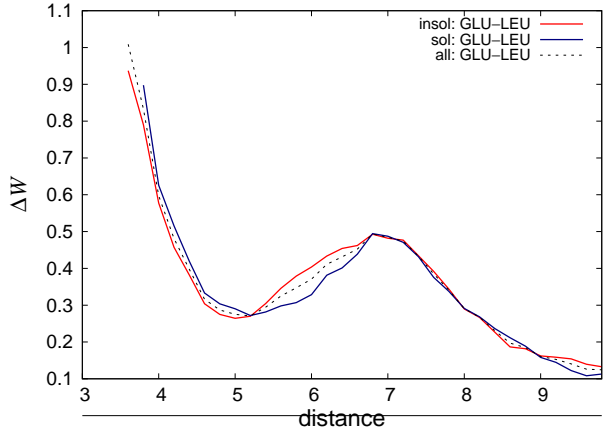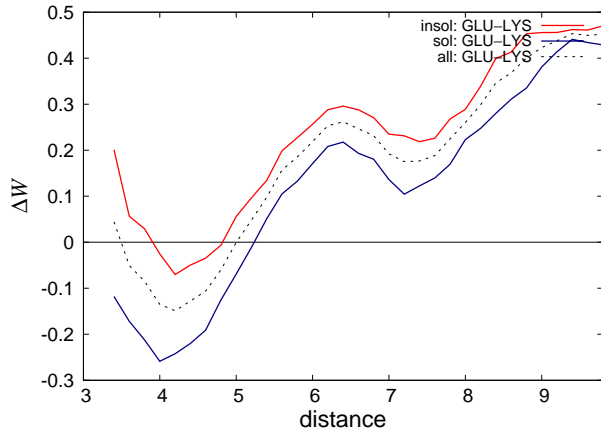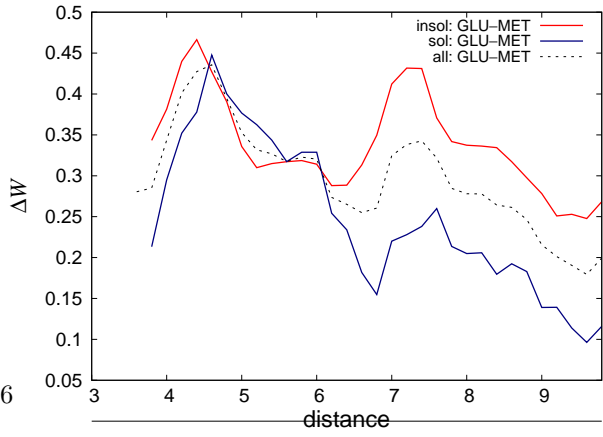

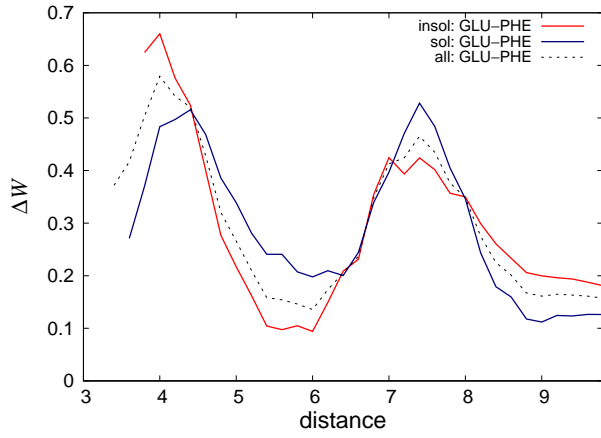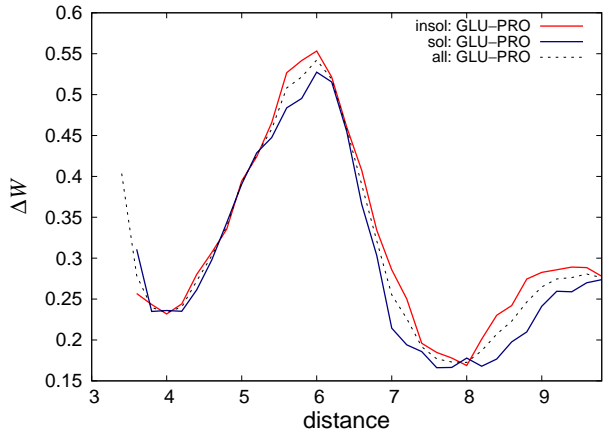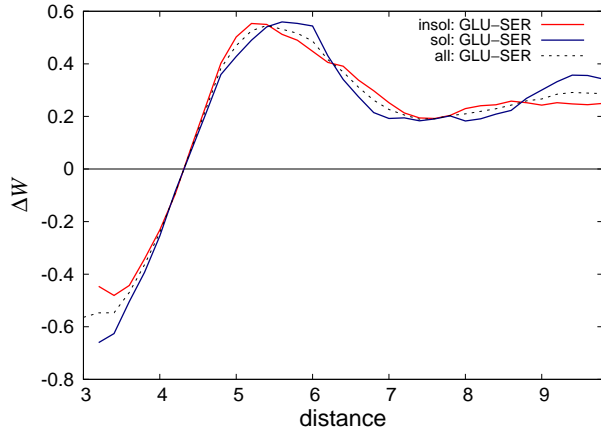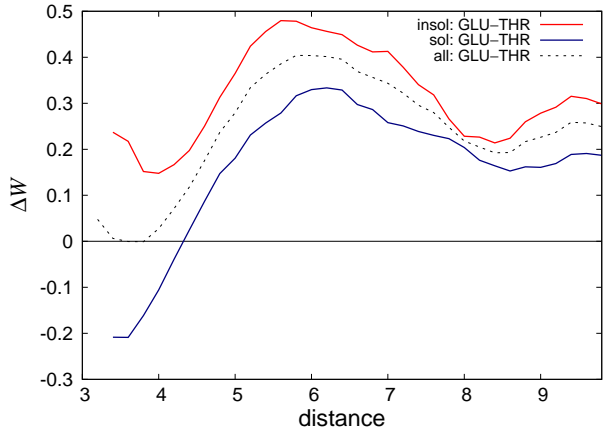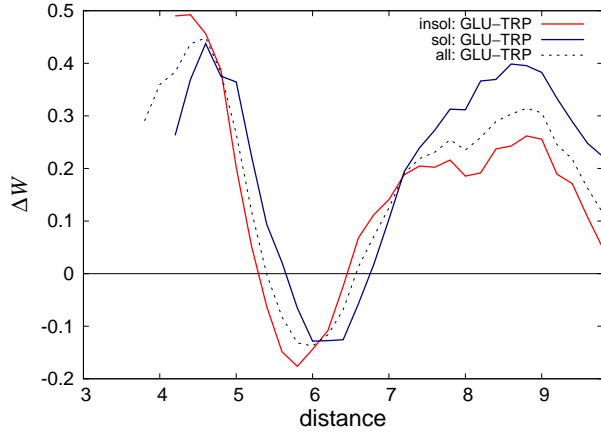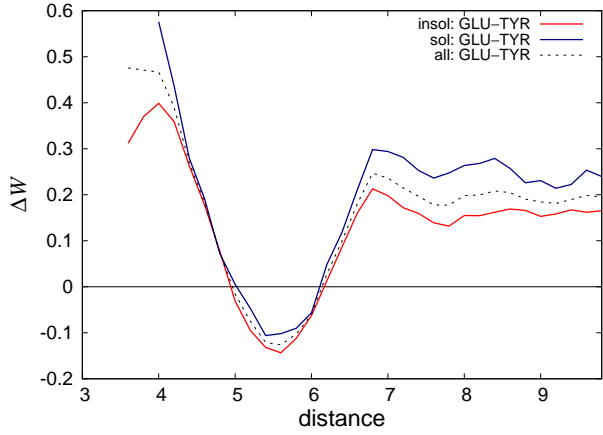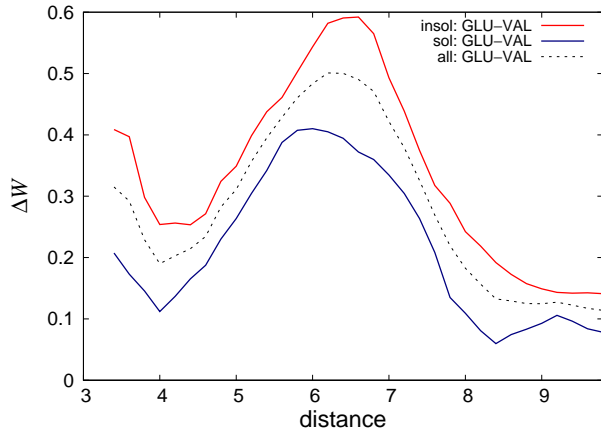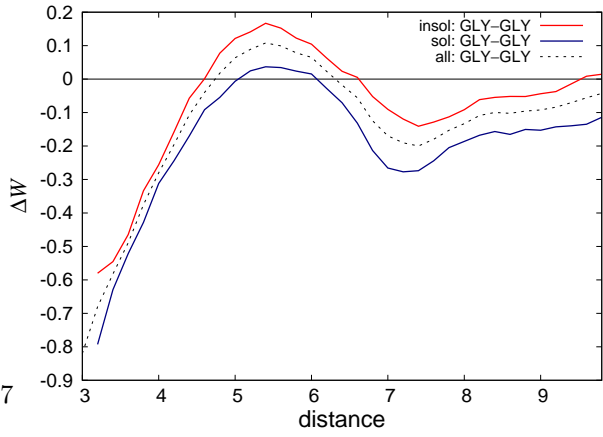

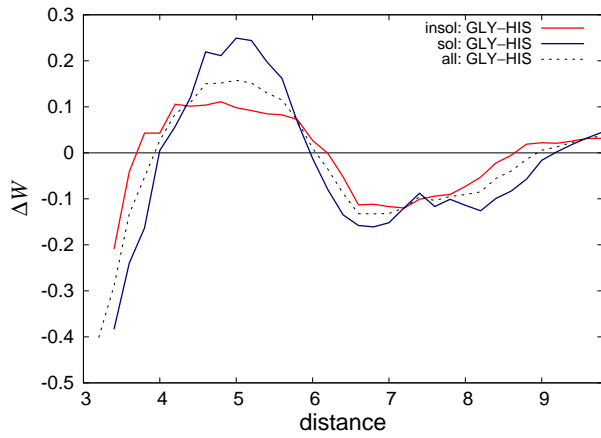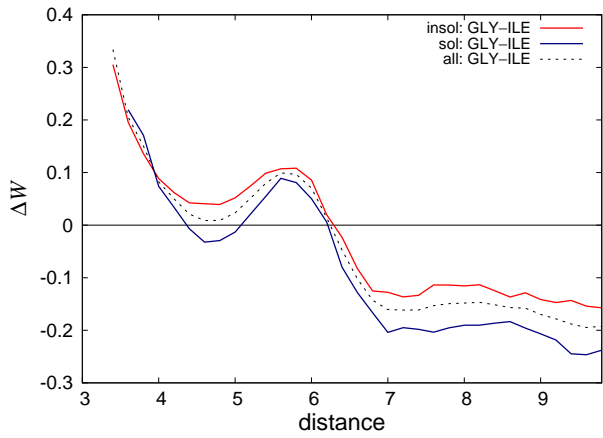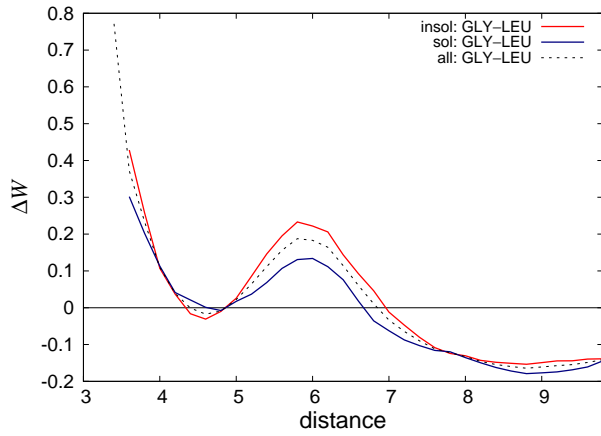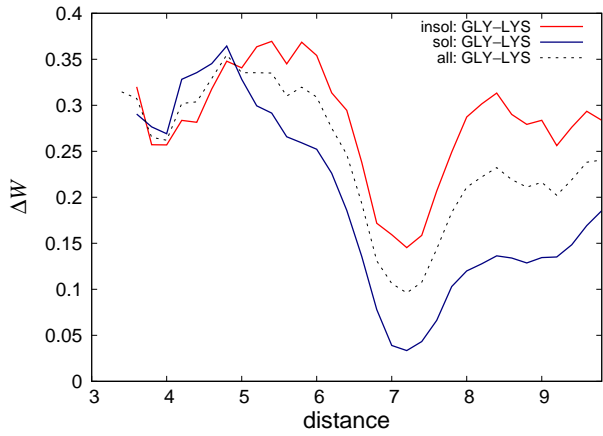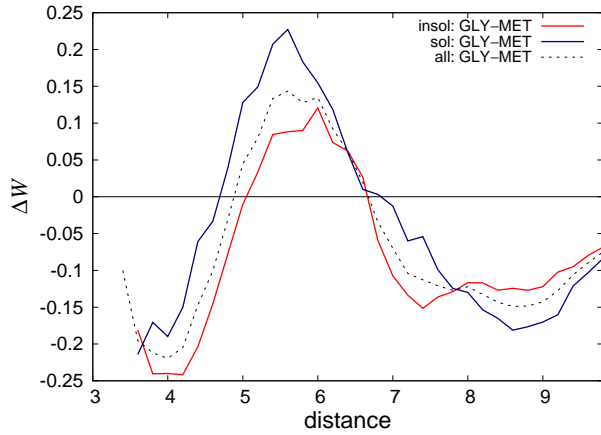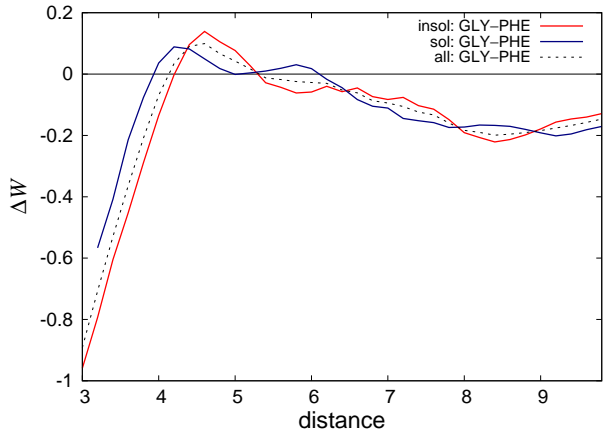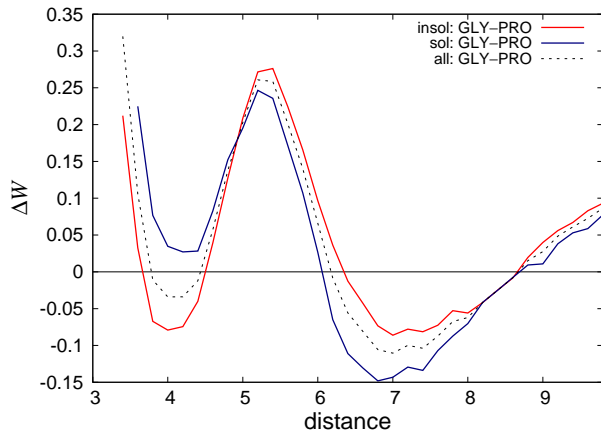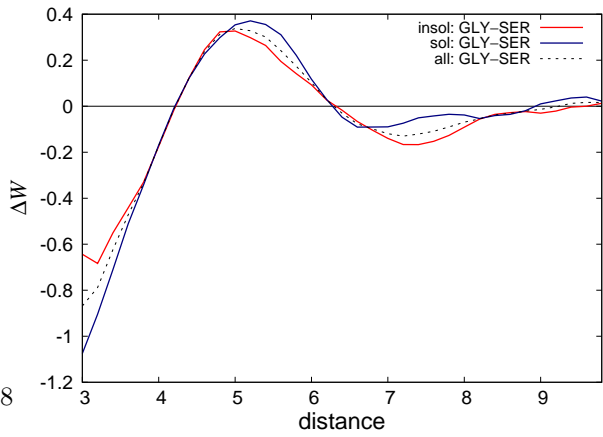

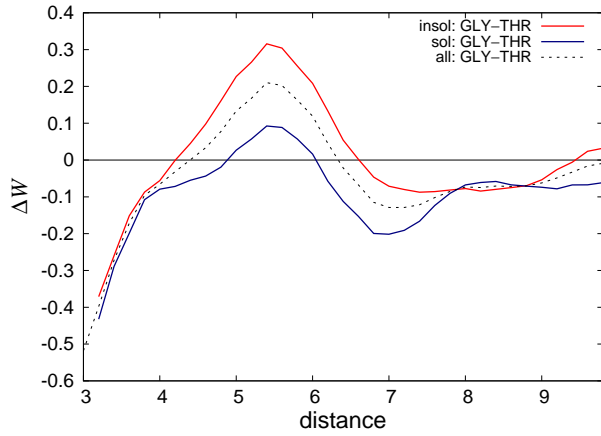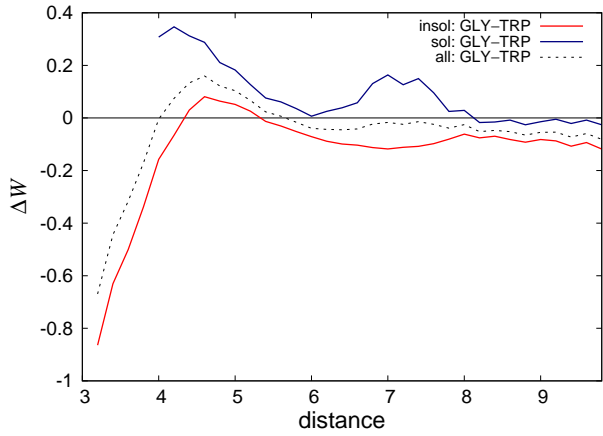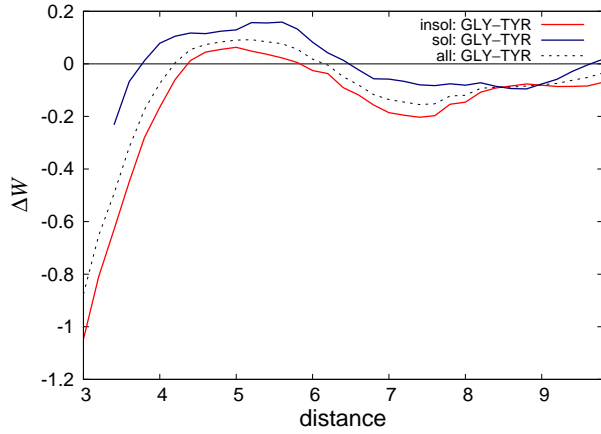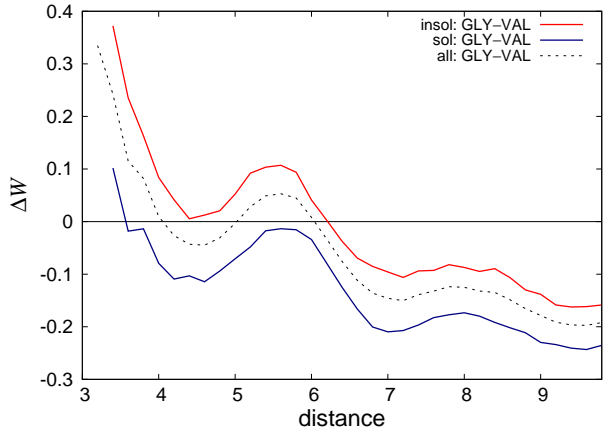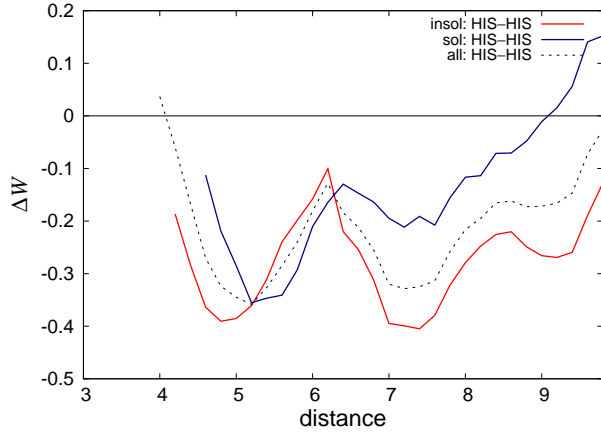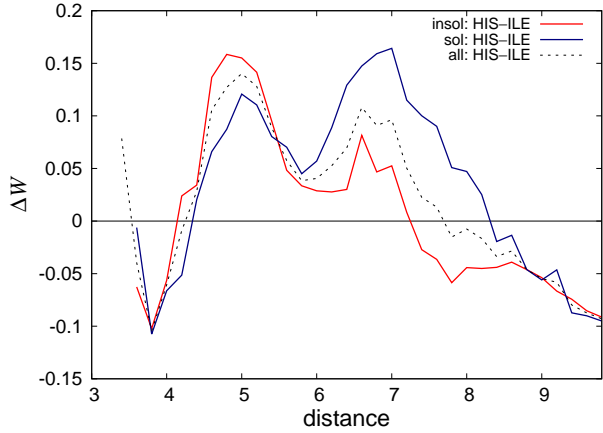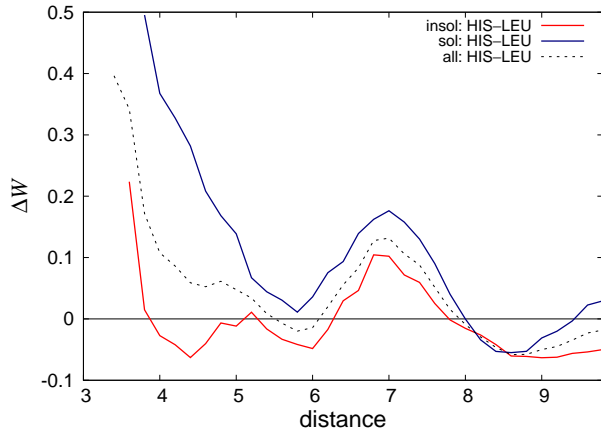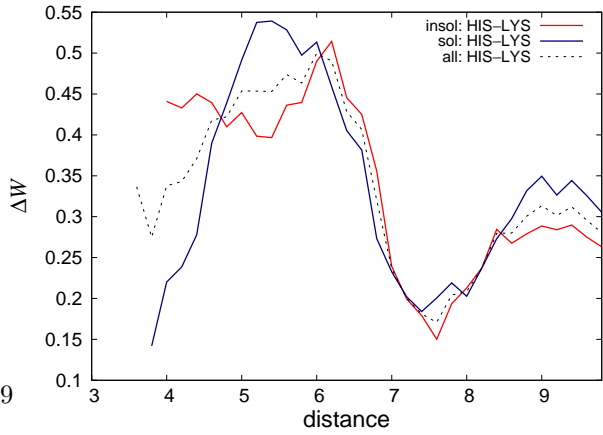

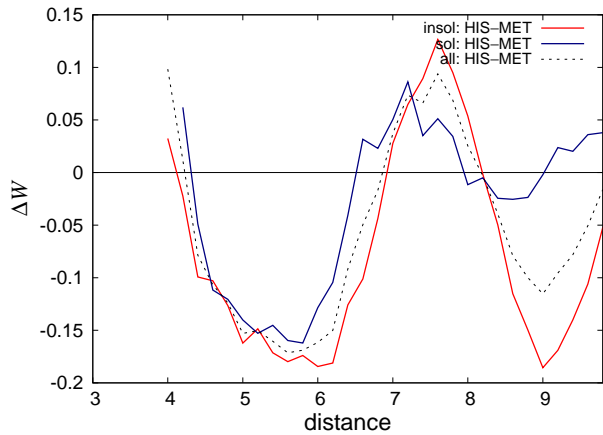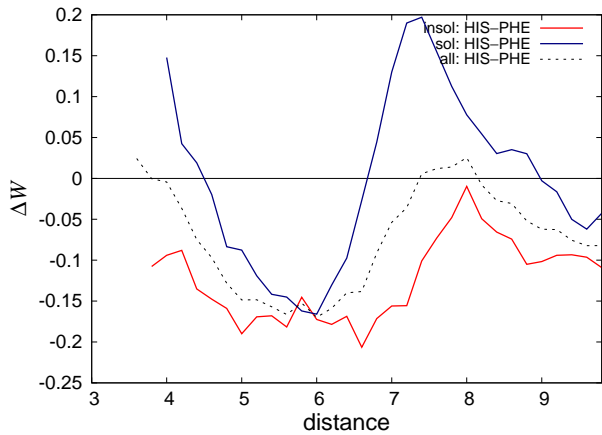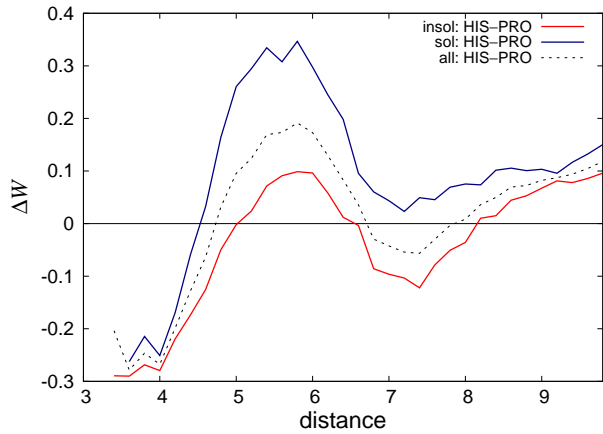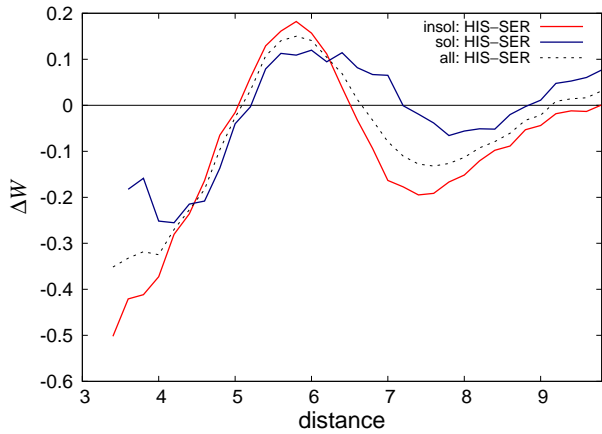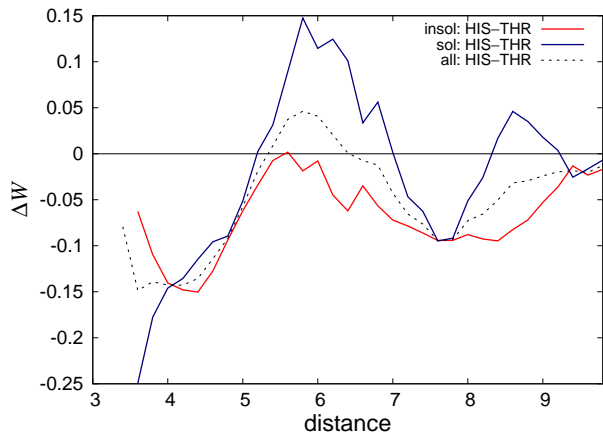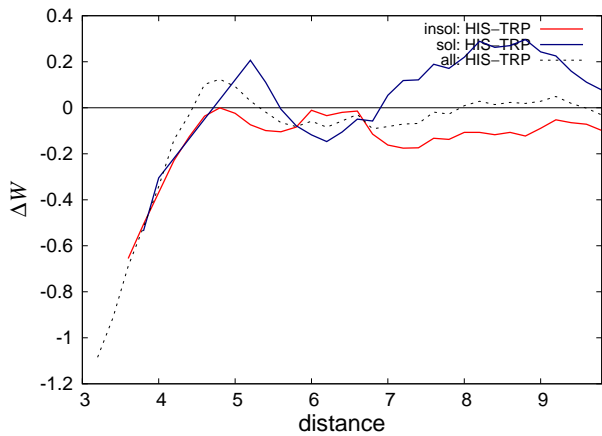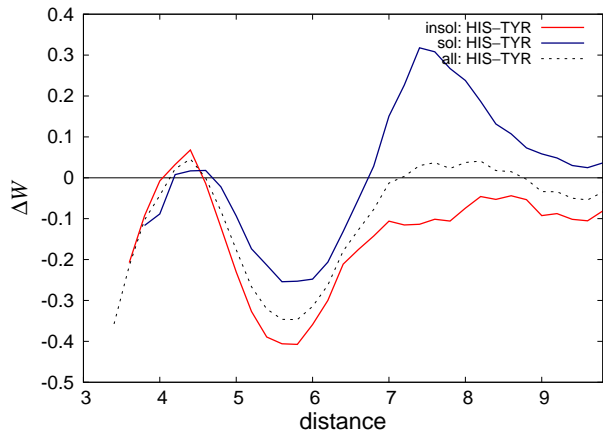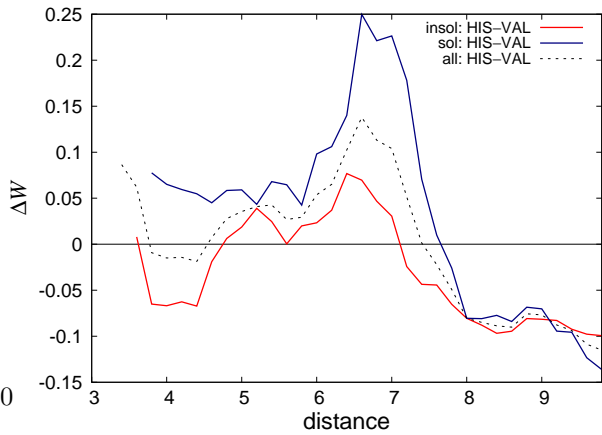

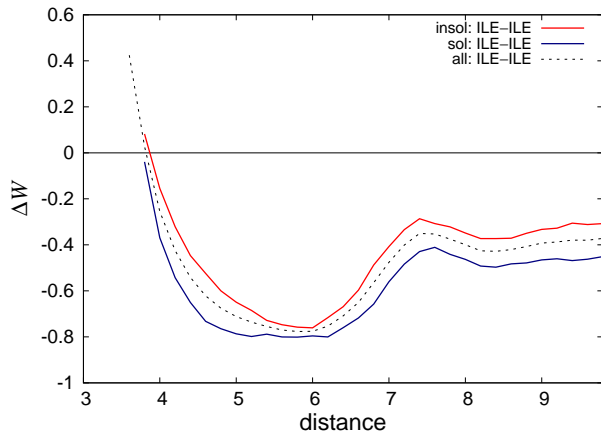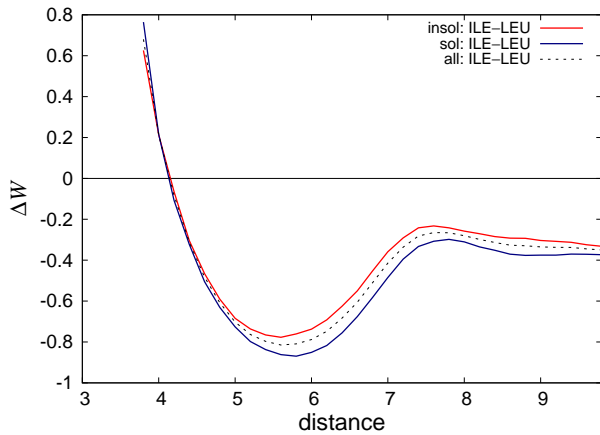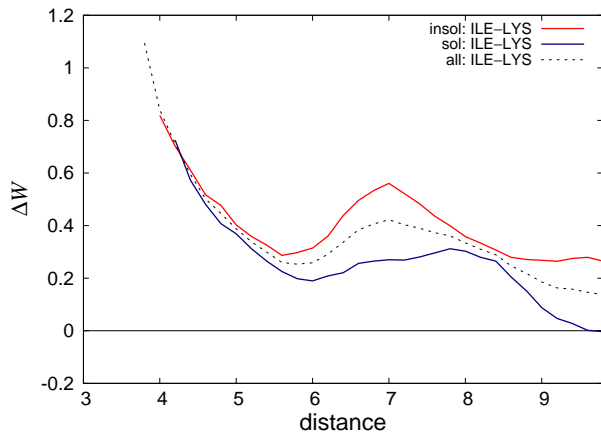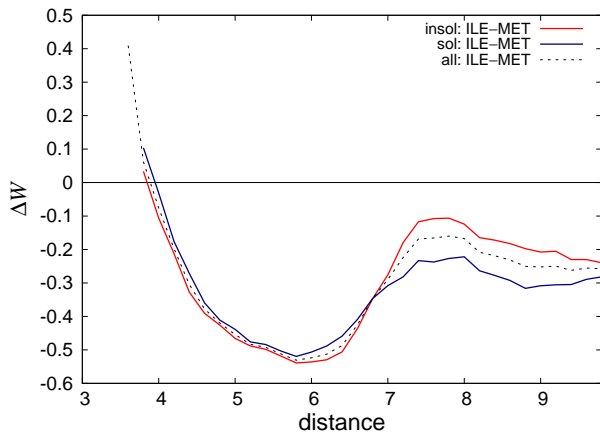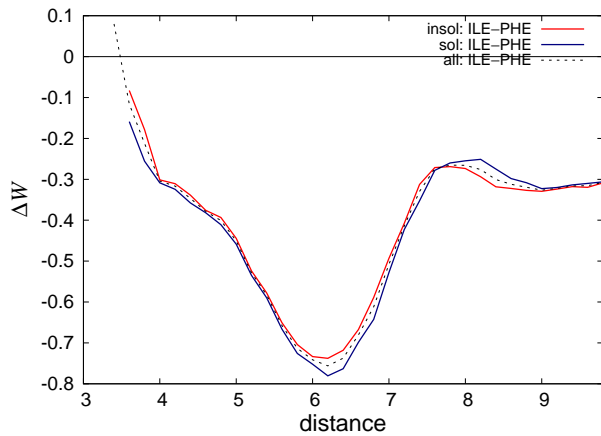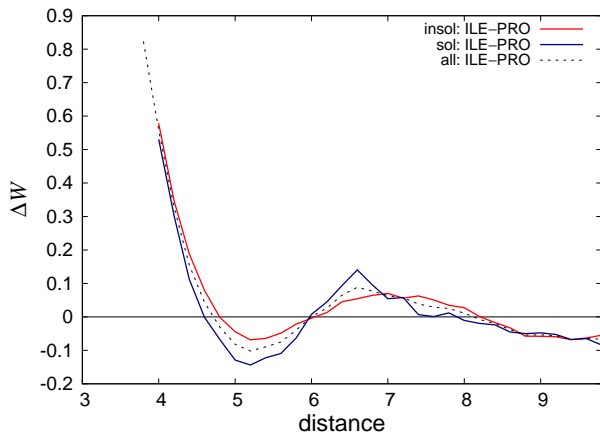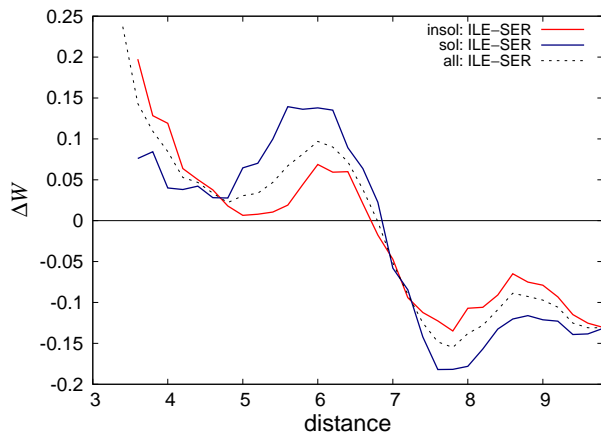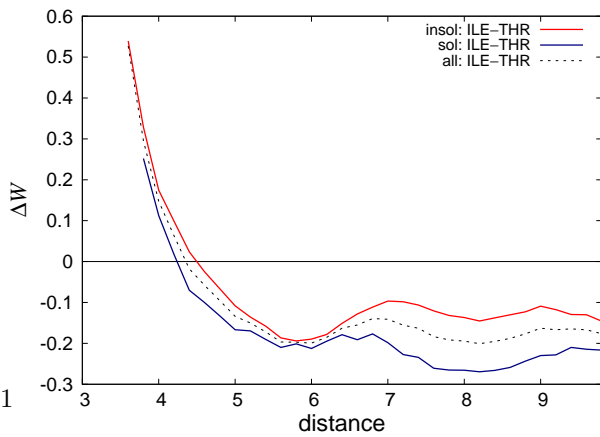

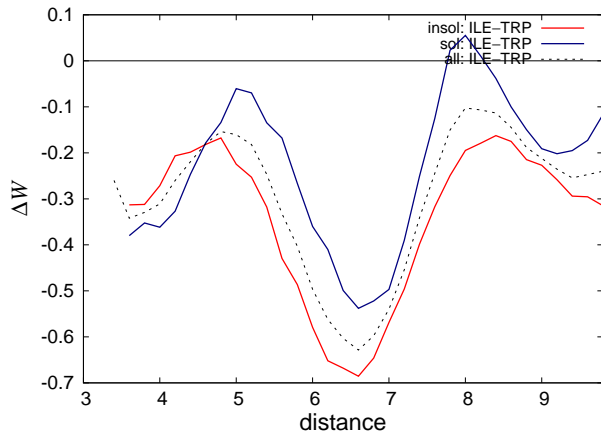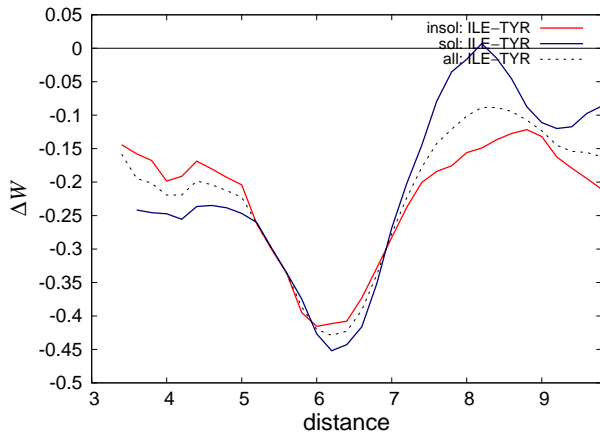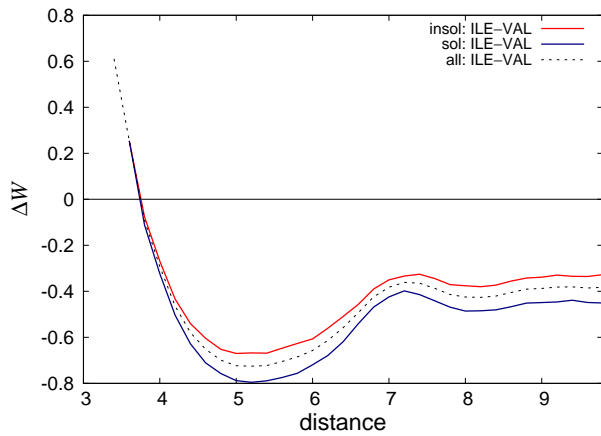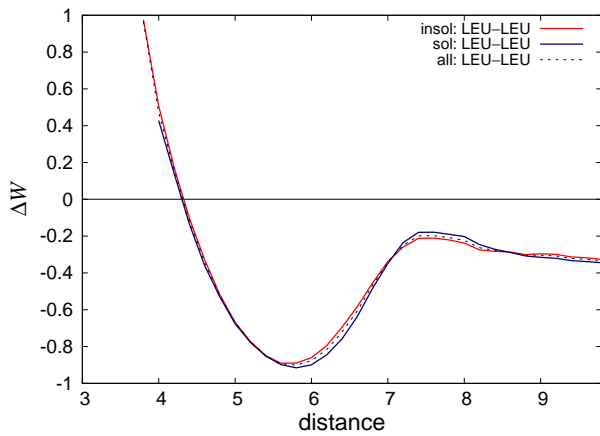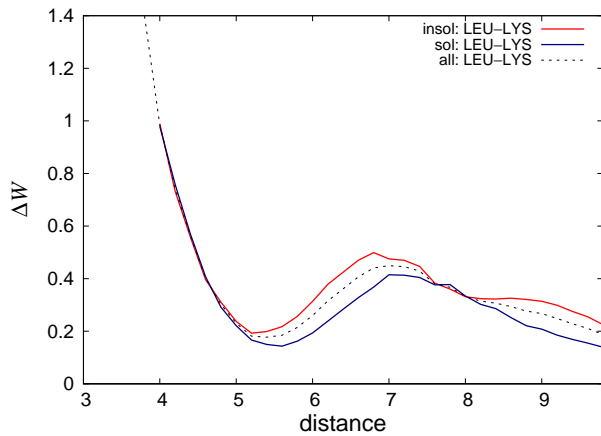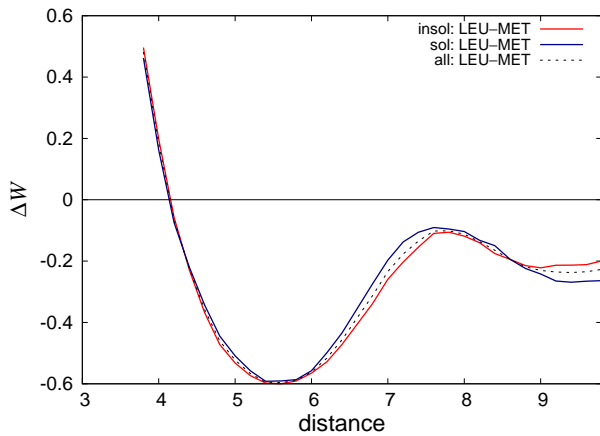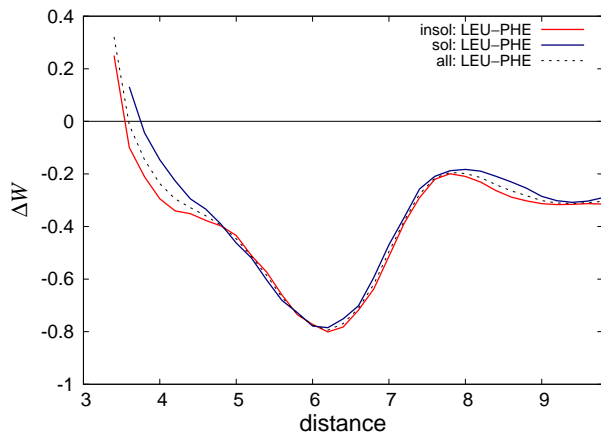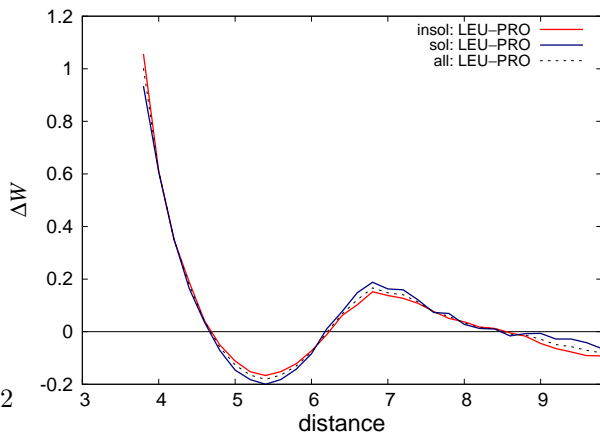



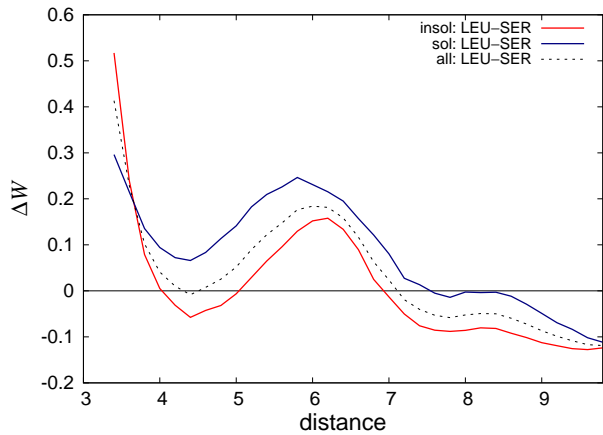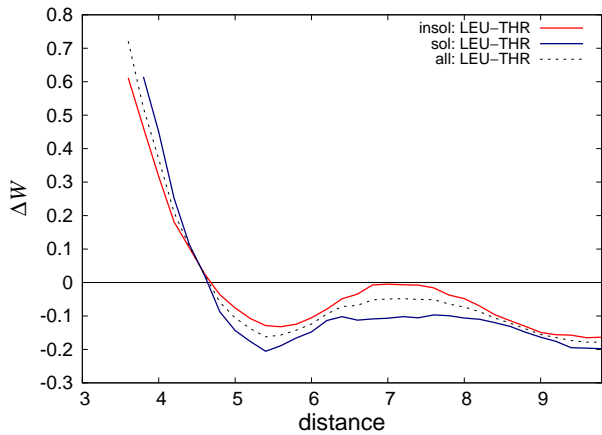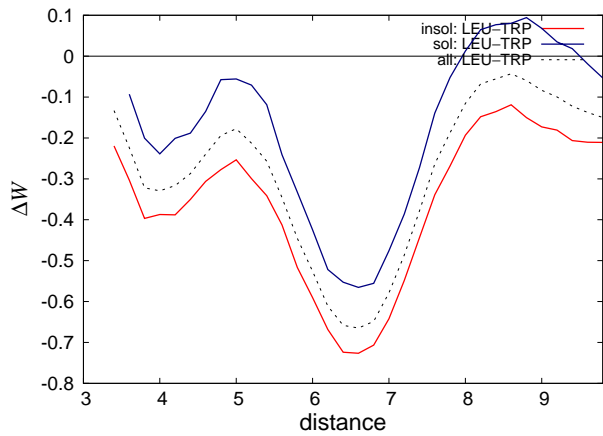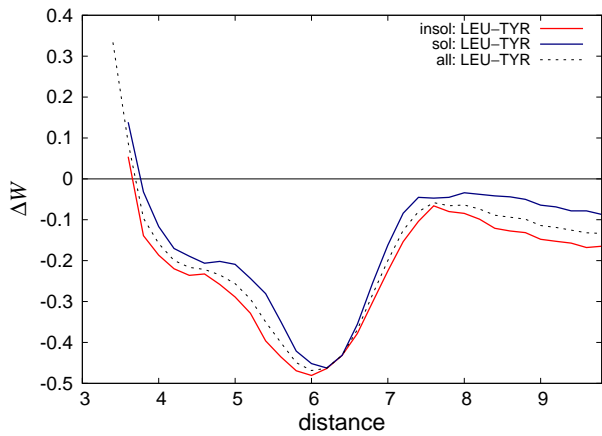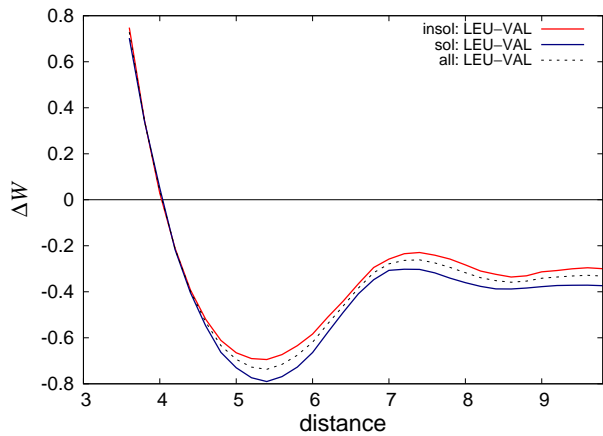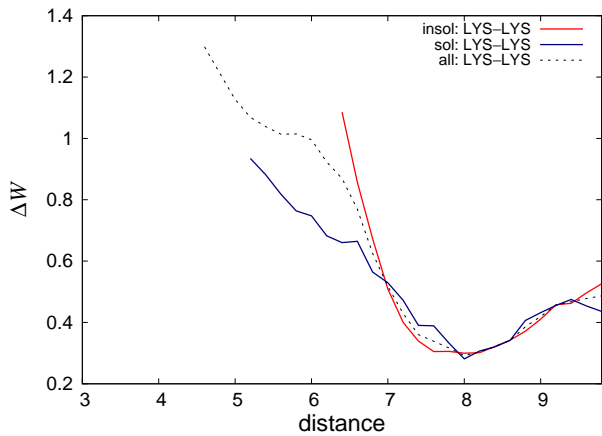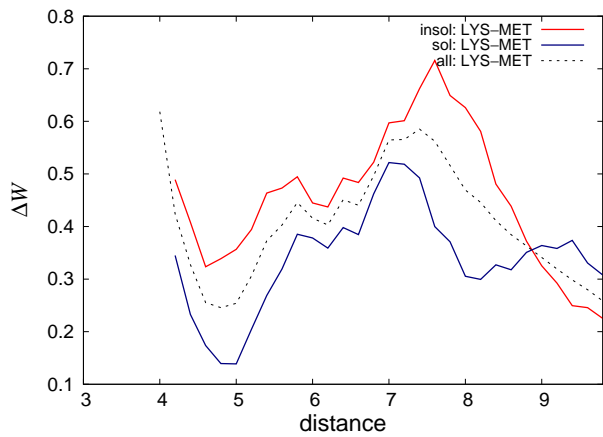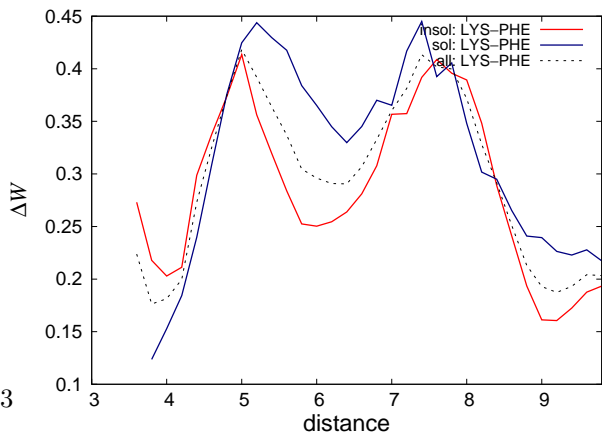

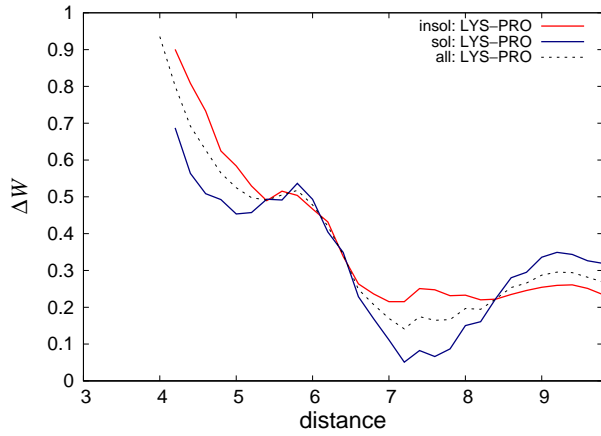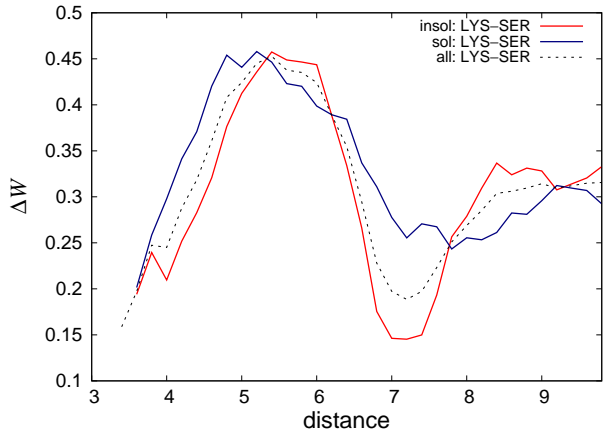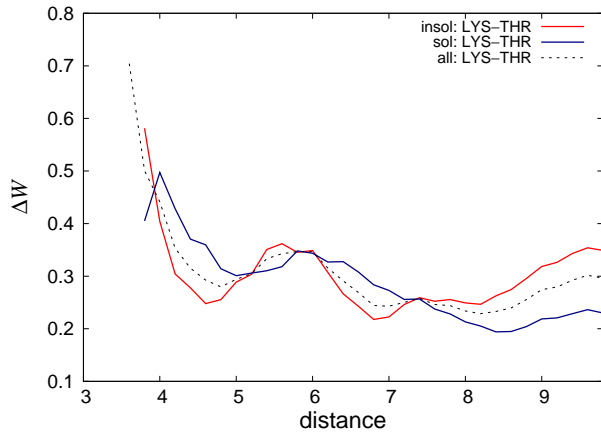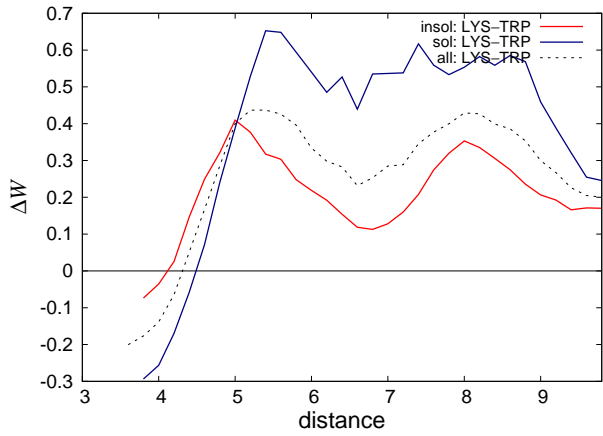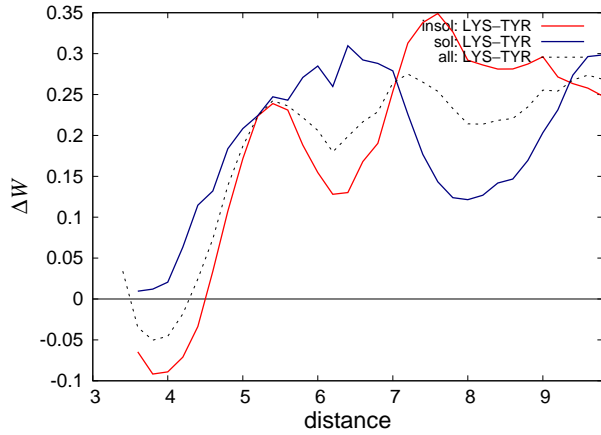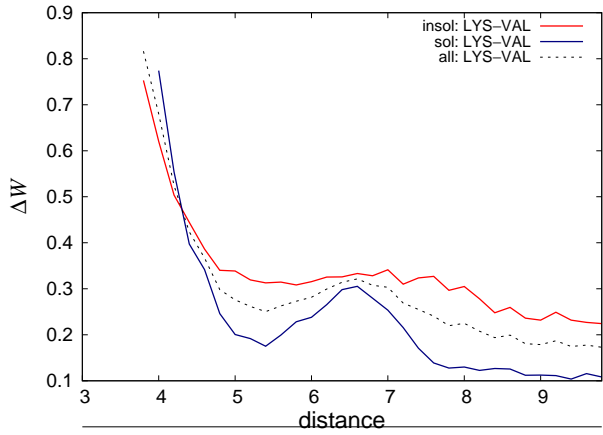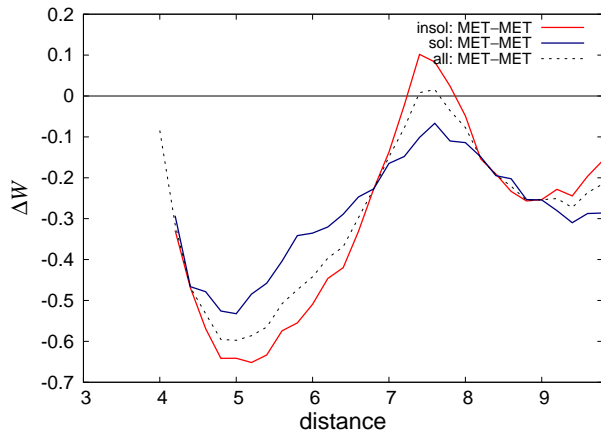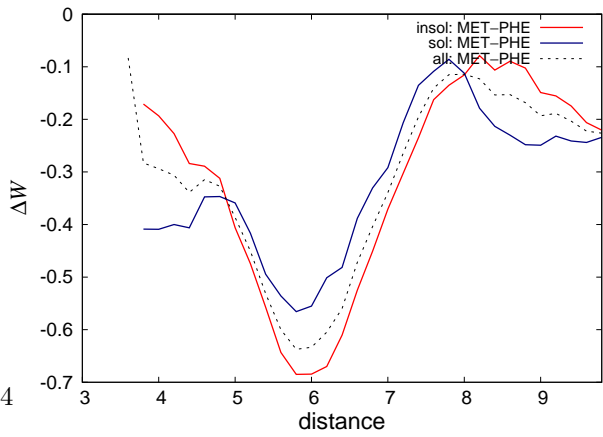

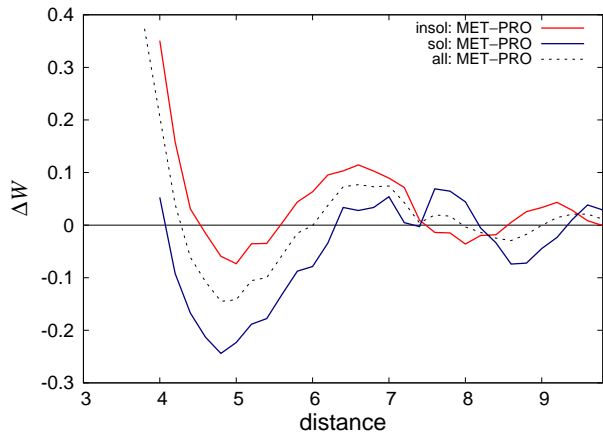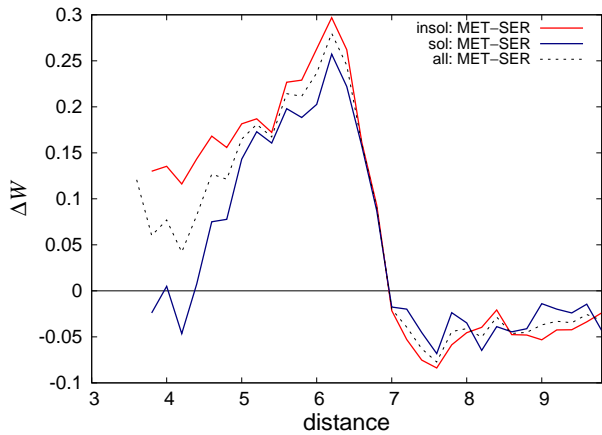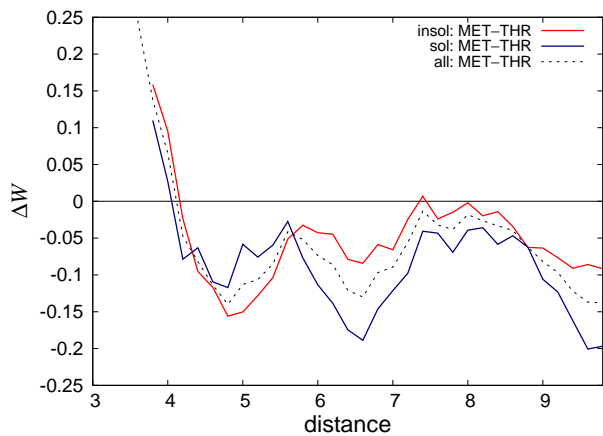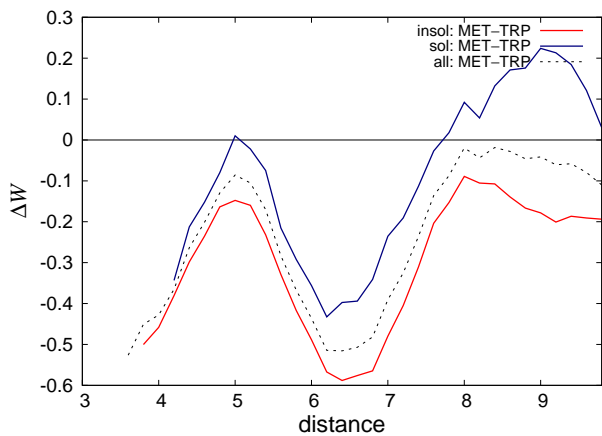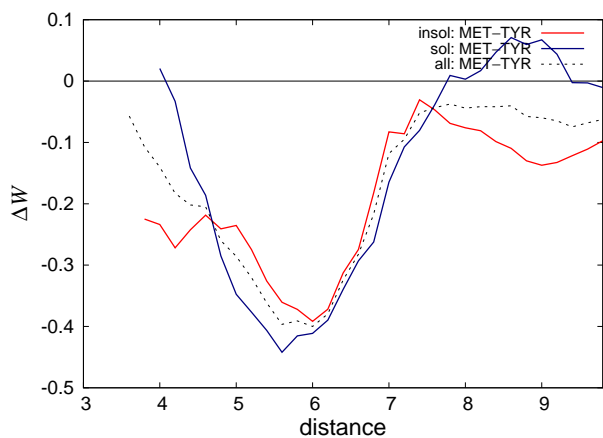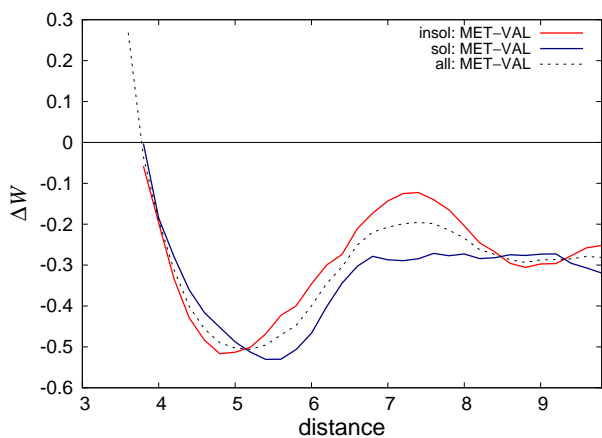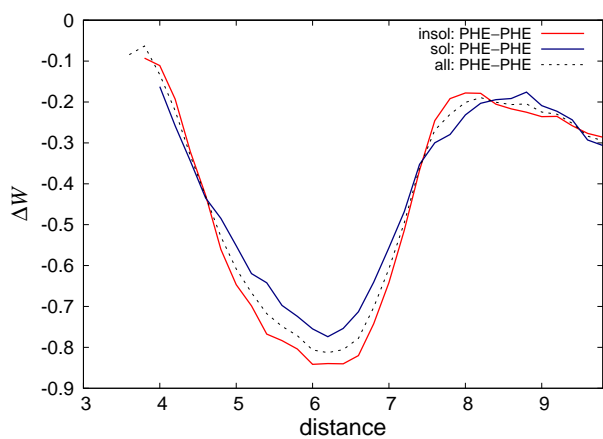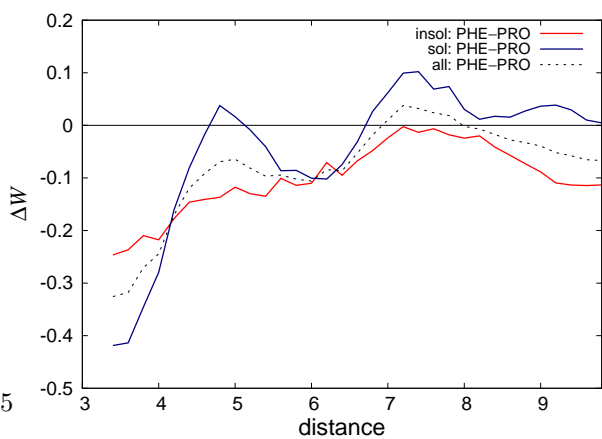

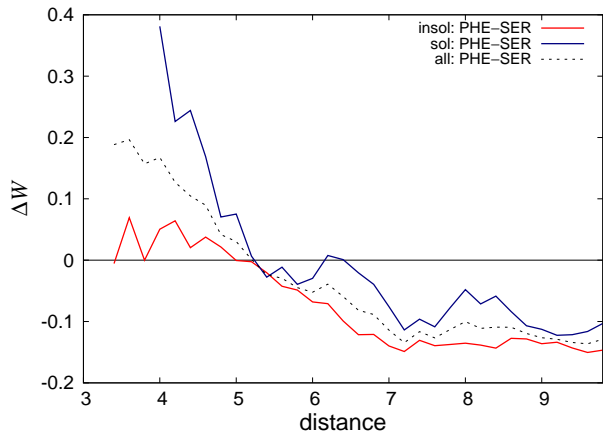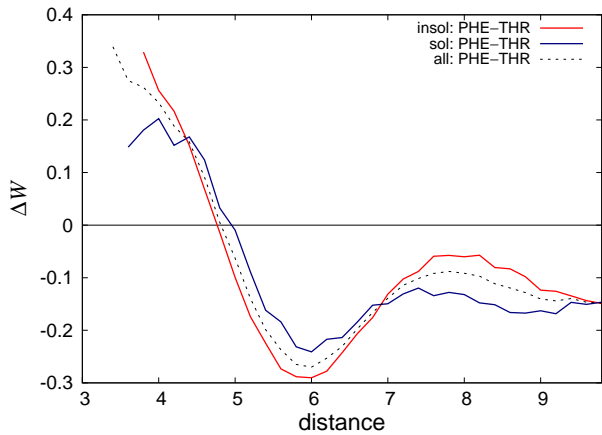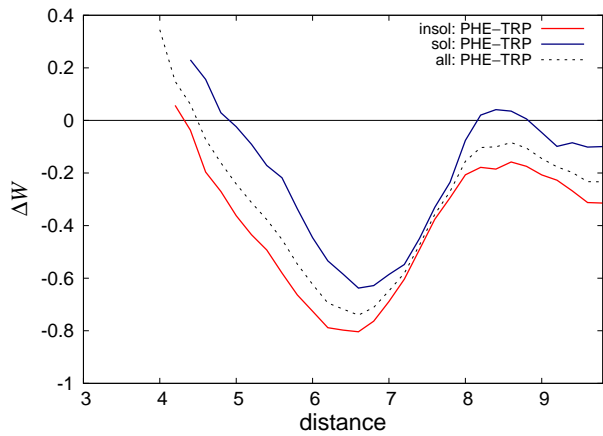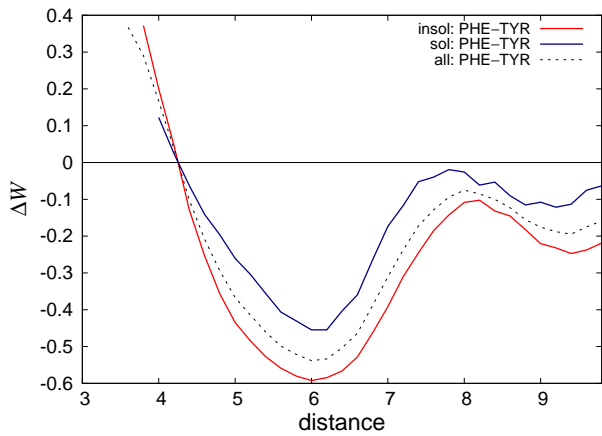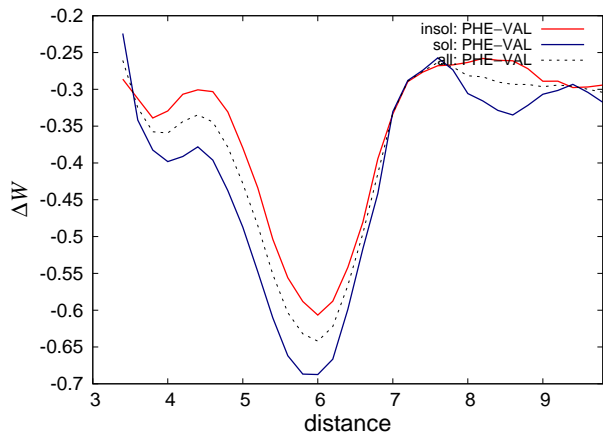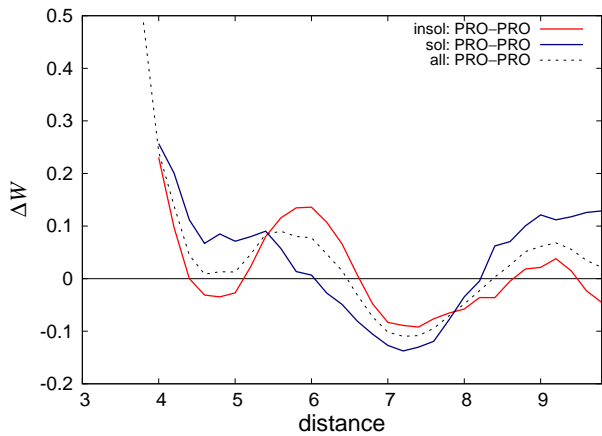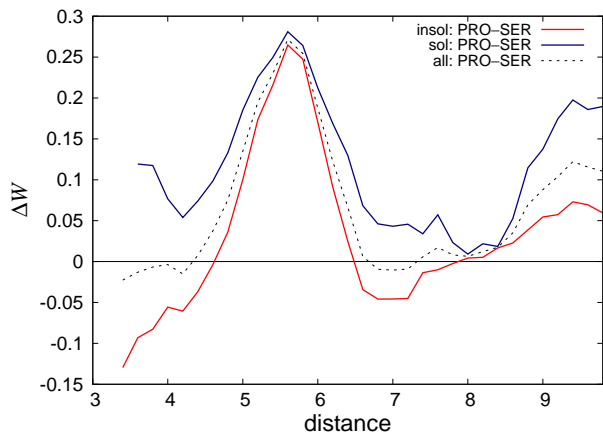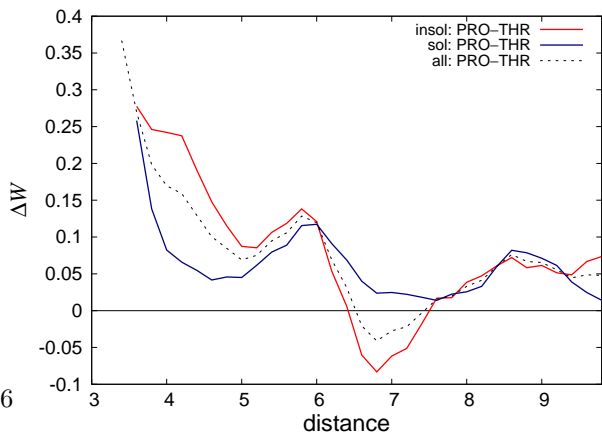

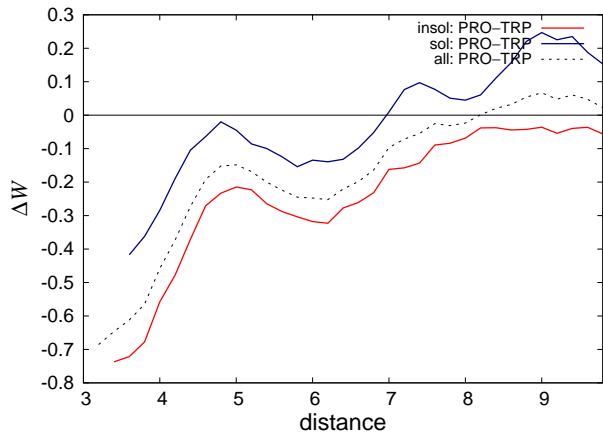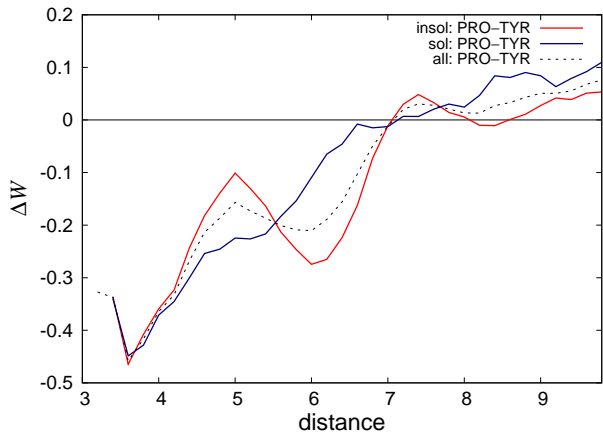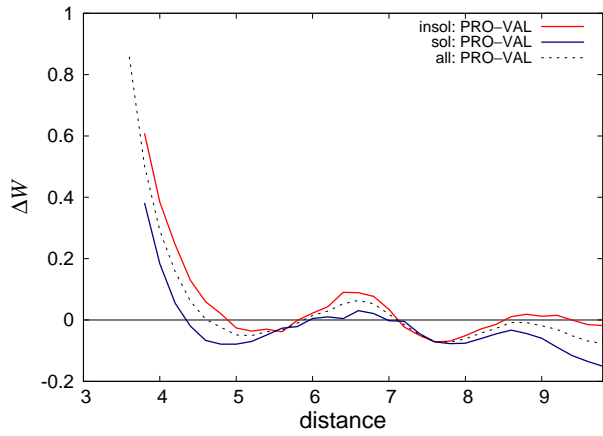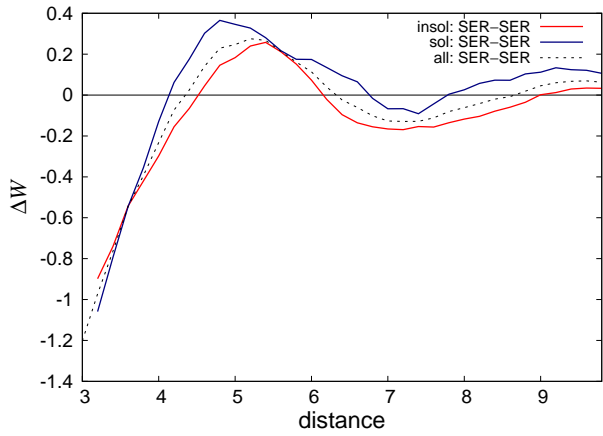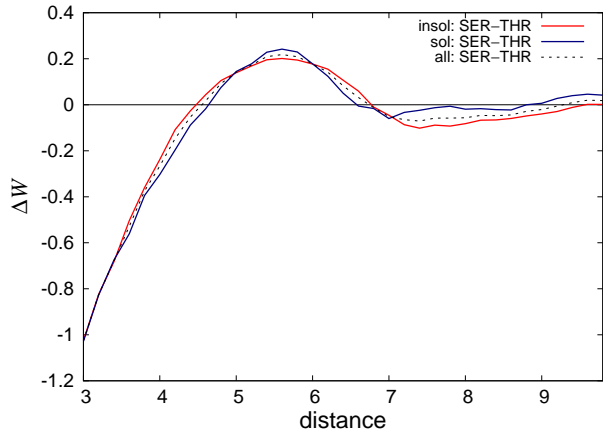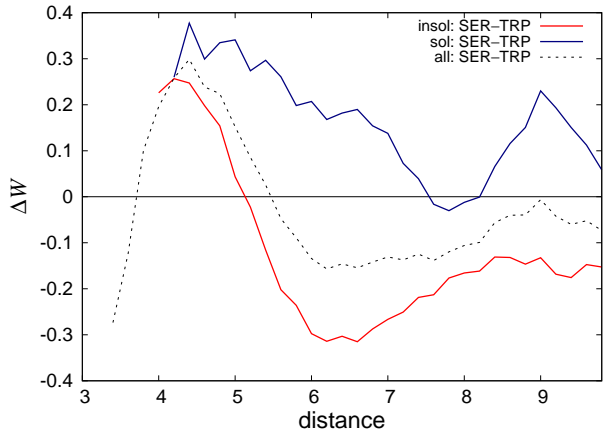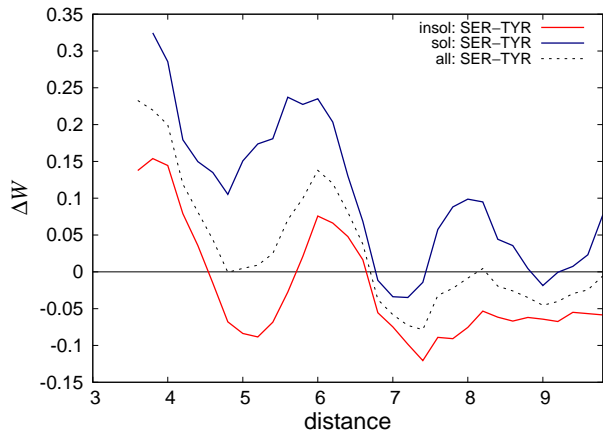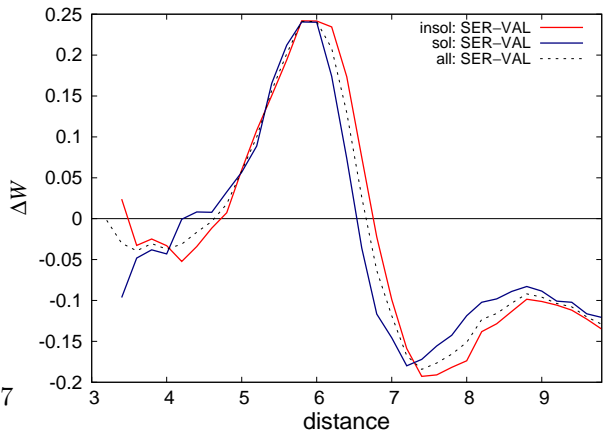

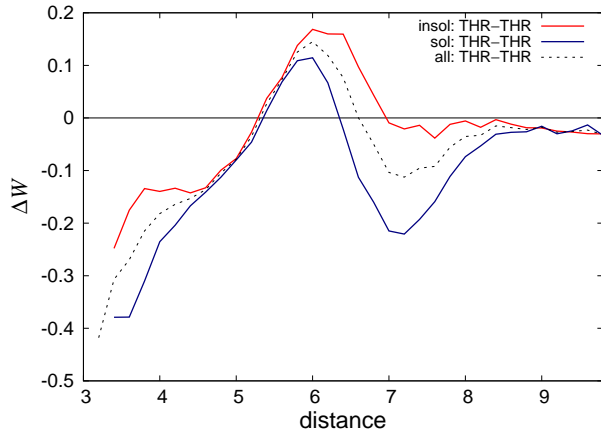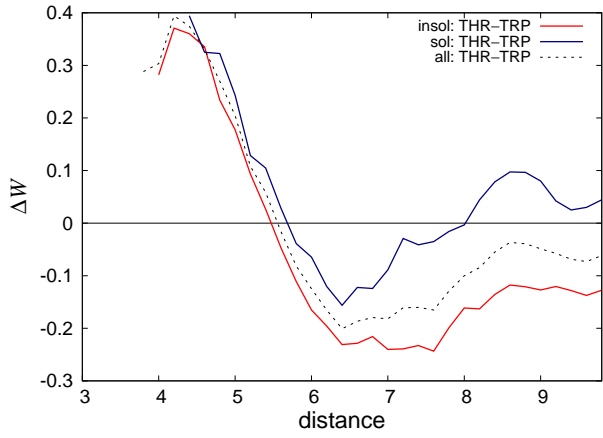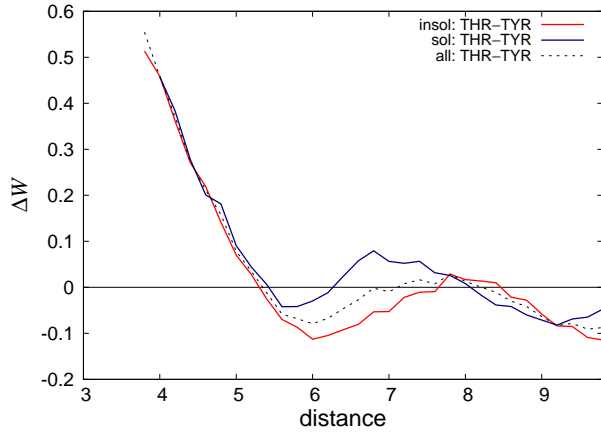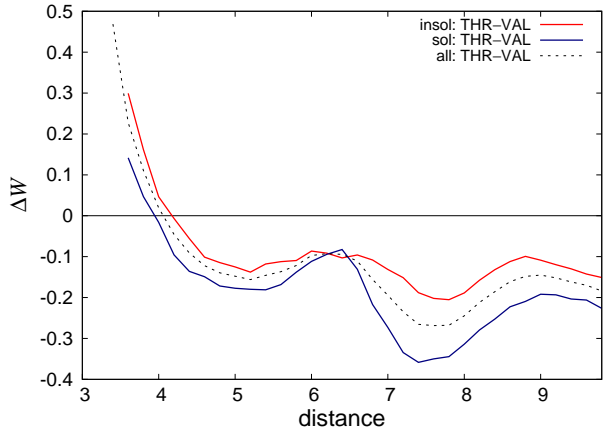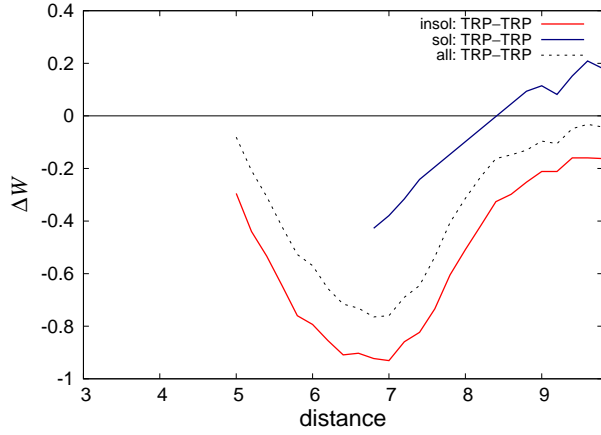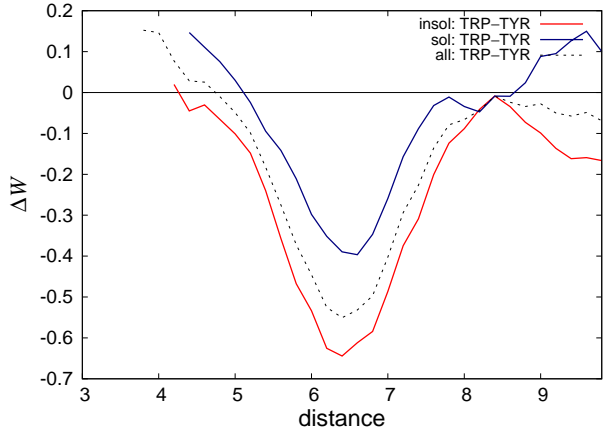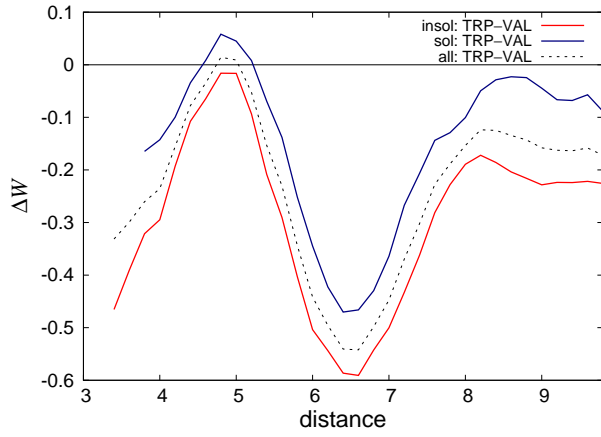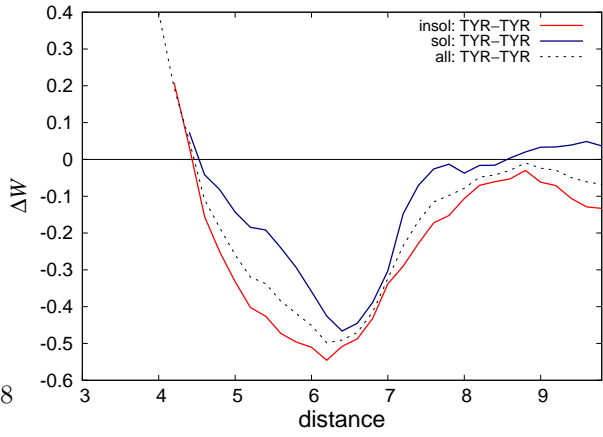

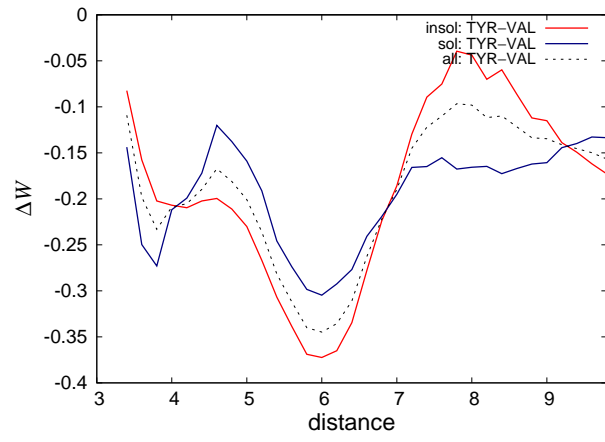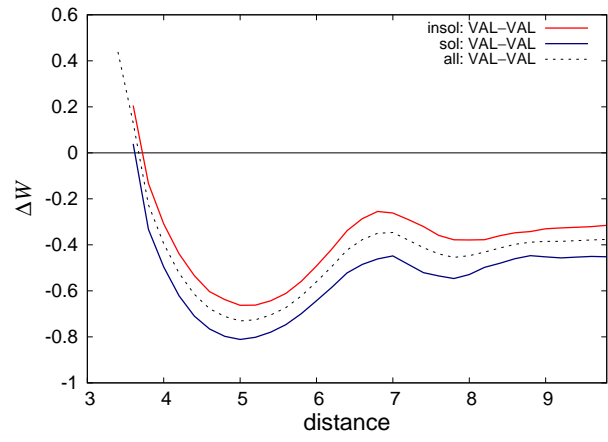

**Figure S4. Residue-residue group potentials derived from datasets** of highly soluble proteins ( $\mathcal{S} \geq 70\%$ ; dashed blue line), soluble proteins ( $\mathcal{S} \geq 64\%$ ; blue line), aggregation-prone proteins ( $\mathcal{S} < 64\%$ ; red line), highly aggregation-prone proteins ( $\mathcal{S} \leq 30\%$ ; red dashed line) and all proteins together (black dotted line). The energies are in kcal/mol, the distance  $d$  is computed between the residue side chain centroids of the smallest amino acids in the group, and the residue pairs are separated by at least 8 residues along the chain. Distance bins containing twenty occurrences or less are not drawn.

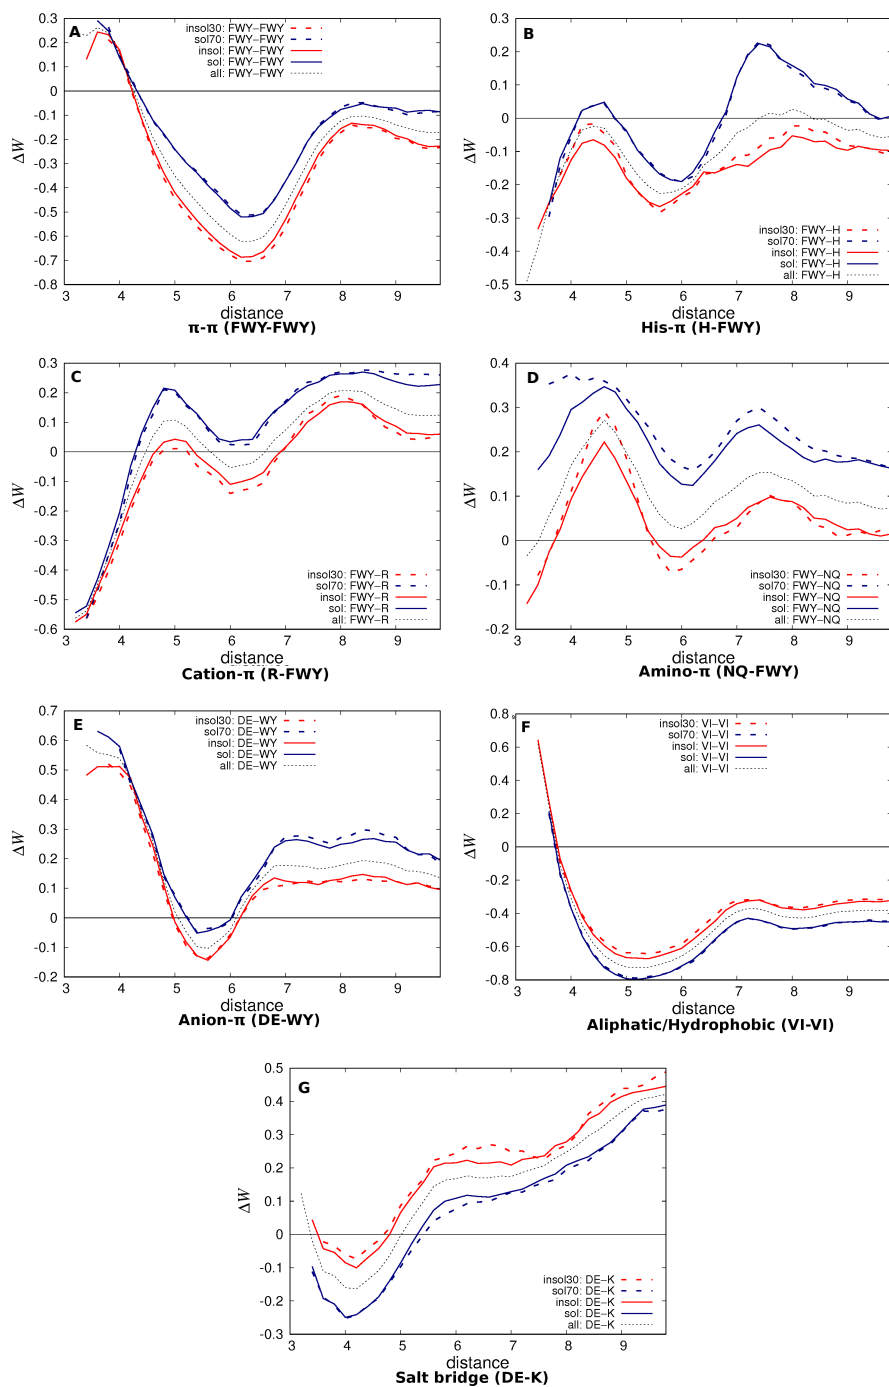

Supplement: 41598_2018_32988_MOESM1_ESM.pdf [file 41598_2018_32988_MOESM1_ESM.pdf]
